# Supplementary material
Source: HighWire-hosted journal article supplement (https://bmjopen.bmj.com/content/12/4/e049441)
Supplement: inline-supplementary-material-1 [file inline-supplementary-material-1.pdf]

**Health Assessment**

| READ_CODE | READ_DESC                                      |
|-----------|------------------------------------------------|
| 9HB5.     | Learning disabilities annual health assessment |

**Downs (GP)**

| READ_CODE | READ_DESC                          |
|-----------|------------------------------------|
| PJ0..     | Down's syndrome - trisomy 21       |
| PJ00.     | Trisomy 21, meiotic nondisjunction |
| PJ0z.     | Down's syndrome NOS                |
| PJ02.     | Trisomy 21, translocation          |
| PJ01.     | Trisomy 21, mosaicism              |

**Hospital**

| ALT_CODE | DESCRIPTION                                    |
|----------|------------------------------------------------|
| Q900     | Trisomy 21, meiotic nondisjunction             |
| Q901     | Trisomy 21, mosaicism (mitotic nondisjunction) |
| Q902     | Trisomy 21, translocation                      |
| Q909     | Down syndrome, unspecified                     |
| Q909     | Down's syndrome, unspecified                   |

| ALT_CODE | DESCRIPTION   |
|----------|---------------|
| Q90      | Down syndrome |

**Autism (GP)**

| READ_CODE | READ_DESC                 |
|-----------|---------------------------|
| 1J9..     | Suspected autism          |
| E1401     | Residual infantile autism |
| E1400     | Active infantile autism   |
| E140.     | Infantile autism          |
| Eu841     | [X]Atypical autism        |
| E140z     | Infantile autism NOS      |
| Eu840     | [X]Childhood autism       |

**Hospital**

| ALT_CODE | DESCRIPTION      |
|----------|------------------|
| F840     | Childhood autism |
| F841     | Atypical autism  |

**Learning disability (GP)**

## READ\_COD

E READ\_DESC

1J9.. Suspected autism

69DB. Learning disability health examination

8Ce6. Preferred place of care - learning disability unit

8H4f. Referral to learning disabilities psychiatrist

8HHP. Referral to learning disability team

8Hg2. Discharge from learning disability team

918e. On learning disability register

94Z9. Preferred place of death: learning disability unit

9HB.. Learning disabilities administration status

9HB0. Learning disabilities health action plan declined

9HB1. Learning disabilities health action plan offered

9HB2. Learning disabilities health action plan reviewed

9HB3. Learning disabilities health assessment

9HB4. Learning disabilities health action plan completed

9HB5. Learning disabilities annual health assessment

9HB6. Learning disabilities annual health assessment declined

9HB7. Did not attend learning disabilities annual health assessment

9N0y. Seen in learning disabilities clinic

9hL.. Exception reporting: learning disability quality indicators

9mA.. Learning disability annual health check invitation

9mA0. Learning disability annual health check verbal invitation

9mA1. Learning disability annual health check telephone invitation

9mA2. Learning disability annual health check letter invitation

9mA20 Learning disability annual health check invitation first letter

9mA21 Learning disability annual health check invitation second letter

9mA22 Learning disability annual health check invitation third letter

E140. Infantile autism

E1400 Active infantile autism

E1401 Residual infantile autism

E140z Infantile autism NOS

E3... Mental retardation

E30.. Mild mental retardation, IQ in range 50-70

E31.. Other specified mental retardation

E310. Moderate mental retardation, IQ in range 35-49

E311. Severe mental retardation, IQ in range 20-34

E312. Profound mental retardation with IQ less than 20

E31z. Other specified mental retardation NOS

E3y.. Other specified mental retardation

E3z.. Mental retardation NOS

Eu7.. [X]Mental retardation

Eu70. [X]Mild mental retardation

Eu700 [X]Mild mental retardation with the statement of no, or minimal, impairment of behaviour

Eu701 [X]Mild mental retardation, significant impairment of behaviour requiring attention or treatment

|       |                                                                                                         |
|-------|---------------------------------------------------------------------------------------------------------|
| Eu70y | [X]Mild mental retardation, other impairments of behaviour                                              |
| Eu70z | [X]Mild mental retardation without mention of impairment of behaviour                                   |
| Eu71. | [X]Moderate mental retardation                                                                          |
| Eu710 | [X]Moderate mental retardation with the statement of no, or minimal, impairment of behaviour            |
| Eu711 | [X]Moderate mental retardation, significant impairment of behaviour requiring attention or treatment    |
| Eu71y | [X]Mod retard oth behav impair                                                                          |
| Eu71z | [X]Moderate mental retardation without mention of impairment of behaviour                               |
| Eu72. | [X]Severe mental retardation                                                                            |
| Eu720 | [X]Severe mental retardation with the statement of no, or minimal, impairment of behaviour              |
| Eu721 | [X]Severe mental retardation, significant impairment of behaviour requiring attention or treatment      |
| Eu72y | [X]Severe mental retardation, other impairments of behaviour                                            |
| Eu72z | [X]Severe mental retardation without mention of impairment of behaviour                                 |
| Eu73. | [X]Profound mental retardation                                                                          |
| Eu730 | [X]Profound mental retardation with the statement of no, or minimal, impairment of behaviour            |
| Eu731 | [X]Profound mental retardation, significant impairment of behaviour requiring attention or treatment    |
| Eu73y | [X]Profound mental retardation, other impairments of behaviour                                          |
| Eu73z | [X]Profound mental retardation without mention of impairment of behaviour                               |
| Eu7y. | [X]Other mental retardation                                                                             |
| Eu7y0 | [X]Other mental retardation with the statement of no, or minimal, impairment of behaviour               |
| Eu7y1 | [X]Other mental retardation, significant impairment of behaviour requiring attention or treatment       |
| Eu7yy | [X]Other mental retardation, other impairments of behaviour                                             |
| Eu7yz | [X]Other mental retardation without mention of impairment of behaviour                                  |
| Eu7z. | [X]Unspecified mental retardation                                                                       |
| Eu7z0 | [X]Unspecified mental retardation with the statement of no, or minimal, impairment of behaviour         |
| Eu7z1 | [X]Unspecified mental retardation, significant impairment of behaviour requiring attention or treatment |
| Eu7zy | [X]Unspecified mental retardation, other impairments of behaviour                                       |
| Eu7zz | [X]Unspecified mental retardation without mention of impairment of behaviour                            |
| Eu814 | [X]Moderate learning disability                                                                         |
| Eu815 | [X]Severe learning disability                                                                           |
| Eu816 | [X]Mild learning disability                                                                             |
| Eu817 | [X]Profound learning disability                                                                         |
| Eu818 | [X]Specific learning disability                                                                         |
| Eu840 | [X]Childhood autism                                                                                     |
| Eu841 | [X]Atypical autism                                                                                      |
| PJ0.. | Down's syndrome - trisomy 21                                                                            |
| PJ00. | Trisomy 21, meiotic nondisjunction                                                                      |
| PJ01. | Trisomy 21, mosaicism                                                                                   |
| PJ02. | Trisomy 21, translocation                                                                               |
| PJ0z. | Down's syndrome NOS                                                                                     |

## Hospital

| ALT_CODE | DESCRIPTION                                    |
|----------|------------------------------------------------|
| F79X     | Unspecified mental retardation                 |
| Q18.9    | Trisomy 21, meiotic nondisjunction             |
| F84.0    | Pervasive developmental disorders              |
| Q90      | Down syndrome                                  |
| Q900     | Trisomy 21, meiotic nondisjunction             |
| Q901     | Trisomy 21, mosaicism (mitotic nondisjunction) |
| Q902     | Trisomy 21, translocation                      |
| Q909     | Down syndrome, unspecified                     |

## Diabetes (GP)

| READ_CODE | READ_DESC                                                         |
|-----------|-------------------------------------------------------------------|
| C10..     | Diabetes mellitus                                                 |
| C100.     | Diabetes mellitus with no mention of complication                 |
| C1000     | Diabetes mellitus, juvenile type, with no mention of complication |
| C1001     | Diabetes mellitus, adult onset, with no mention of complication   |
| C100z     | Diabetes mellitus NOS with no mention of complication             |
| C101.     | Diabetes mellitus with ketoacidosis                               |
| C1010     | Diabetes mellitus, juvenile type, with ketoacidosis               |
| C1011     | Diabetes mellitus, adult onset, with ketoacidosis                 |
| C101y     | Other specified diabetes mellitus with ketoacidosis               |
| C101z     | Diabetes mellitus NOS with ketoacidosis                           |
| C102.     | Diabetes mellitus with hyperosmolar coma                          |
| C1020     | Diabetes mellitus, juvenile type, with hyperosmolar coma          |
| C1021     | Diabetes mellitus, adult onset, with hyperosmolar coma            |
| C102z     | Diabetes mellitus NOS with hyperosmolar coma                      |
| C103.     | Diabetes mellitus with ketoacidotic coma                          |
| C1030     | Diabetes mellitus, juvenile type, with ketoacidotic coma          |
| C1031     | Diabetes mellitus, adult onset, with ketoacidotic coma            |
| C103y     | Other specified diabetes mellitus with coma                       |
| C103z     | Diabetes mellitus NOS with ketoacidotic coma                      |
| C104.     | Diabetes mellitus with renal manifestation                        |
| C1040     | Diabetes mellitus, juvenile type, with renal manifestation        |
| C1041     | Diabetes mellitus, adult onset, with renal manifestation          |
| C104y     | Other specified diabetes mellitus with renal complications        |
| C104z     | Diabetes mellitus with nephropathy NOS                            |
| C105.     | Diabetes mellitus with ophthalmic manifestation                   |
| C1050     | Diabetes mellitus, juvenile type, with ophthalmic manifestation   |
| C1051     | Diabetes mellitus, adult onset, with ophthalmic manifestation     |
| C105y     | Other specified diabetes mellitus with ophthalmic complications   |
| C105z     | Diabetes mellitus NOS with ophthalmic manifestation               |
| C1060     | Diabetes mellitus, juvenile type, with neurological manifestation |
| C1061     | Diabetes mellitus, adult onset, with neurological manifestation   |

|       |                                                                             |
|-------|-----------------------------------------------------------------------------|
| C107. | Diabetes mellitus with peripheral circulatory disorder                      |
| C1070 | Diabetes mellitus, juvenile type, with peripheral circulatory disorder      |
| C1071 | Diabetes mellitus, adult onset, with peripheral circulatory disorder        |
| C1072 | Diabetes mellitus, adult with gangrene                                      |
| C1073 | IDDM with peripheral circulatory disorder                                   |
| C1074 | NIDDM with peripheral circulatory disorder                                  |
| C107y | Other specified diabetes mellitus with peripheral circulatory complications |
| C107z | Diabetes mellitus NOS with peripheral circulatory disorder                  |
| C108. | Insulin dependent diabetes mellitus                                         |
| C1080 | Insulin-dependent diabetes mellitus with renal complications                |
| C1081 | Insulin-dependent diabetes mellitus with ophthalmic complications           |
| C1082 | Insulin-dependent diabetes mellitus with neurological complications         |
| C1083 | Insulin dependent diabetes mellitus with multiple complications             |
| C1084 | Unstable insulin dependent diabetes mellitus                                |
| C1085 | Insulin dependent diabetes mellitus with ulcer                              |
| C1086 | Insulin dependent diabetes mellitus with gangrene                           |
| C1087 | Insulin dependent diabetes mellitus with retinopathy                        |
| C1088 | Insulin dependent diabetes mellitus - poor control                          |
| C1089 | Insulin dependent diabetes maturity onset                                   |
| C108A | Insulin-dependent diabetes without complication                             |
| C108B | Insulin dependent diabetes mellitus with mononeuropathy                     |
| C108C | Insulin dependent diabetes mellitus with polyneuropathy                     |
| C108D | Insulin dependent diabetes mellitus with nephropathy                        |
| C108E | Insulin dependent diabetes mellitus with hypoglycaemic coma                 |
| C108F | Insulin dependent diabetes mellitus with diabetic cataract                  |
| C108G | Insulin dependent diabetes mellitus with peripheral angiopathy              |
| C108H | Insulin dependent diabetes mellitus with arthropathy                        |
| C108J | Insulin dependent diabetes mellitus with neuropathic arthropathy            |
| C108y | Other specified diabetes mellitus with multiple complications               |
| C108z | Unspecified diabetes mellitus with multiple complications                   |
| C109. | Non-insulin dependent diabetes mellitus                                     |
| C1090 | Non-insulin-dependent diabetes mellitus with renal complications            |
| C1091 | Non-insulin-dependent diabetes mellitus with ophthalmic complications       |
| C1092 | Non-insulin-dependent diabetes mellitus with neurological complications     |
| C1093 | Non-insulin-dependent diabetes mellitus with multiple complications         |
| C1094 | Non-insulin dependent diabetes mellitus with ulcer                          |
| C1095 | Non-insulin dependent diabetes mellitus with gangrene                       |
| C1096 | Non-insulin-dependent diabetes mellitus with retinopathy                    |
| C1097 | Non-insulin dependent diabetes mellitus - poor control                      |
| C1099 | Non-insulin-dependent diabetes mellitus without complication                |
| C109A | Non-insulin dependent diabetes mellitus with mononeuropathy                 |
| C109B | Non-insulin dependent diabetes mellitus with polyneuropathy                 |
| C109C | Non-insulin dependent diabetes mellitus with nephropathy                    |
| C109D | Non-insulin dependent diabetes mellitus with hypoglycaemic coma             |
| C109E | Non-insulin dependent diabetes mellitus with diabetic cataract              |
| C109F | Non-insulin-dependent diabetes mellitus with peripheral angiopathy          |
| C109G | Non-insulin dependent diabetes mellitus with arthropathy                    |
| C109H | Non-insulin dependent diabetes mellitus with neuropathic arthropathy        |

|       |                                                            |
|-------|------------------------------------------------------------|
| C109J | Insulin treated Type 2 diabetes mellitus                   |
| C109K | Hyperosmolar non-ketotic state in type 2 diabetes mellitus |
| C10E. | Type 1 diabetes mellitus                                   |
| C10E0 | Type 1 diabetes mellitus with renal complications          |
| C10E1 | Type 1 diabetes mellitus with ophthalmic complications     |
| C10E2 | Type 1 diabetes mellitus with neurological complications   |
| C10E3 | Type 1 diabetes mellitus with multiple complications       |
| C10E4 | Unstable type 1 diabetes mellitus                          |
| C10E5 | Type 1 diabetes mellitus with ulcer                        |
| C10E6 | Type 1 diabetes mellitus with gangrene                     |
| C10E7 | Type 1 diabetes mellitus with retinopathy                  |
| C10E8 | Type 1 diabetes mellitus - poor control                    |
| C10E9 | Type 1 diabetes mellitus maturity onset                    |
| C10EA | Type 1 diabetes mellitus without complication              |
| C10EB | Type 1 diabetes mellitus with mononeuropathy               |
| C10EC | Type 1 diabetes mellitus with polyneuropathy               |
| C10ED | Type 1 diabetes mellitus with nephropathy                  |
| C10EE | Type 1 diabetes mellitus with hypoglycaemic coma           |
| C10EF | Type 1 diabetes mellitus with diabetic cataract            |
| C10EG | Type 1 diabetes mellitus with peripheral angiopathy        |
| C10EH | Type 1 diabetes mellitus with arthropathy                  |
| C10EJ | Type 1 diabetes mellitus with neuropathic arthropathy      |
| C10EK | Type 1 diabetes mellitus with persistent proteinuria       |
| C10EL | Type 1 diabetes mellitus with persistent microalbuminuria  |
| C10EM | Type 1 diabetes mellitus with ketoacidosis                 |
| C10EN | Type 1 diabetes mellitus with ketoacidotic coma            |
| C10EP | Type 1 diabetes mellitus with exudative maculopathy        |
| C10EQ | Type 1 diabetes mellitus with gastroparesis                |
| C10ER | Latent autoimmune diabetes mellitus in adult               |
| C10F. | Type 2 diabetes mellitus                                   |
| C10F0 | Type 2 diabetes mellitus with renal complications          |
| C10F1 | Type 2 diabetes mellitus with ophthalmic complications     |
| C10F2 | Type 2 diabetes mellitus with neurological complications   |
| C10F3 | Type 2 diabetes mellitus with multiple complications       |
| C10F4 | Type 2 diabetes mellitus with ulcer                        |
| C10F5 | Type 2 diabetes mellitus with gangrene                     |
| C10F6 | Type 2 diabetes mellitus with retinopathy                  |
| C10F7 | Type 2 diabetes mellitus - poor control                    |
| C10F9 | Type 2 diabetes mellitus without complication              |
| C10FA | Type 2 diabetes mellitus with mononeuropathy               |
| C10FB | Type 2 diabetes mellitus with polyneuropathy               |
| C10FC | Type 2 diabetes mellitus with nephropathy                  |
| C10FD | Type 2 diabetes mellitus with hypoglycaemic coma           |
| C10FE | Type 2 diabetes mellitus with diabetic cataract            |
| C10FF | Type 2 diabetes mellitus with peripheral angiopathy        |
| C10FG | Type 2 diabetes mellitus with arthropathy                  |
| C10FH | Type 2 diabetes mellitus with neuropathic arthropathy      |
| C10FJ | Insulin treated Type 2 diabetes mellitus                   |

|       |                                                                                      |
|-------|--------------------------------------------------------------------------------------|
| C10FK | Hyperosmolar non-ketotic state in type 2 diabetes mellitus                           |
| C10FL | Type 2 diabetes mellitus with persistent proteinuria                                 |
| C10FM | Type 2 diabetes mellitus with persistent microalbuminuria                            |
| C10FN | Type 2 diabetes mellitus with ketoacidosis                                           |
| C10FQ | Type 2 diabetes mellitus with exudative maculopathy                                  |
| C10FR | Type 2 diabetes mellitus with gastroparesis                                          |
| C10y. | Diabetes mellitus with other specified manifestation                                 |
| C10y0 | Diabetes mellitus, juvenile type, with other specified manifestation                 |
| C10y1 | Diabetes mellitus, adult onset, with other specified manifestation                   |
| C10yy | Other specified diabetes mellitus with other specified complications                 |
| C10yz | Diabetes mellitus NOS with other specified manifestation                             |
| C10z. | Diabetes mellitus with unspecified complication                                      |
| C10z0 | Diabetes mellitus, juvenile type, with unspecified complication                      |
| C10z1 | Diabetes mellitus, adult onset, with unspecified complication                        |
| C10zy | Other specified diabetes mellitus with unspecified complications                     |
| C10zz | Diabetes mellitus NOS with unspecified complication                                  |
| L180. | Diabetes mellitus during pregnancy, childbirth and the puerperium                    |
| L1800 | Diabetes mellitus - unspecified whether during pregnancy or the puerperium           |
| L1801 | Diabetes mellitus during pregnancy - baby delivered                                  |
|       | Diabetes mellitus in the puerperium - baby delivered during current episode of care  |
| L1802 |                                                                                      |
| L1803 | Diabetes mellitus during pregnancy - baby not yet delivered                          |
|       | Diabetes mellitus in the puerperium - baby delivered during previous episode of care |
| L1804 |                                                                                      |
| L1805 | Pre-existing diabetes mellitus, insulin-dependent                                    |
| L1806 | Pre-existing diabetes mellitus, non-insulin-dependent                                |
| L1808 | Diabetes mellitus arising in pregnancy                                               |
| L1809 | Gestational diabetes mellitus                                                        |
| L180X | Pre-existing diabetes mellitus, unspecified                                          |
| L180z | Diabetes mellitus during pregnancy, childbirth or the puerperium NOS                 |

## Hospital

| ALT_CODE | DESCRIPTION                         |
|----------|-------------------------------------|
| E10      | Insulin-dependent diabetes mellitus |
| E10      | Type 1 diabetes mellitus            |
| E100     | Insulin-dependent diabetes mellitus |
| E100     | Type 1 diabetes mellitus            |
| E101     | Insulin-dependent diabetes mellitus |
| E101     | Type 1 diabetes mellitus            |
| E102     | Insulin-dependent diabetes mellitus |
| E102     | Type 1 diabetes mellitus            |
| E103     | Insulin-dependent diabetes mellitus |
| E103     | Type 1 diabetes mellitus            |
| E104     | Insulin-dependent diabetes mellitus |
| E104     | Type 1 diabetes mellitus            |

|      |                                         |
|------|-----------------------------------------|
| E105 | Insulin-dependent diabetes mellitus     |
| E105 | Type 1 diabetes mellitus                |
| E106 | Insulin-dependent diabetes mellitus     |
| E106 | Type 1 diabetes mellitus                |
| E107 | Insulin-dependent diabetes mellitus     |
| E107 | Type 1 diabetes mellitus                |
| E108 | Insulin-dependent diabetes mellitus     |
| E108 | Type 1 diabetes mellitus                |
| E109 | Insulin-dependent diabetes mellitus     |
| E109 | Type 1 diabetes mellitus                |
| E11  | Non-insulin-dependent diabetes mellitus |
| E11  | Type 2 diabetes mellitus                |
| E110 | Non-insulin-dependent diabetes mellitus |
| E110 | Type 2 diabetes mellitus                |
| E111 | Non-insulin-dependent diabetes mellitus |
| E111 | Type 2 diabetes mellitus                |
| E112 | Non-insulin-dependent diabetes mellitus |
| E112 | Type 2 diabetes mellitus                |
| E113 | Non-insulin-dependent diabetes mellitus |
| E113 | Type 2 diabetes mellitus                |
| E114 | Non-insulin-dependent diabetes mellitus |
| E114 | Type 2 diabetes mellitus                |
| E115 | Non-insulin-dependent diabetes mellitus |
| E115 | Type 2 diabetes mellitus                |
| E116 | Non-insulin-dependent diabetes mellitus |
| E116 | Type 2 diabetes mellitus                |
| E117 | Non-insulin-dependent diabetes mellitus |
| E117 | Type 2 diabetes mellitus                |
| E118 | Non-insulin-dependent diabetes mellitus |
| E118 | Type 2 diabetes mellitus                |
| E119 | Non-insulin-dependent diabetes mellitus |
| E119 | Type 2 diabetes mellitus                |
| E12  | Malnutrition-related diabetes mellitus  |
| E120 | Malnutrition-related diabetes mellitus  |
| E121 | Malnutrition-related diabetes mellitus  |
| E122 | Malnutrition-related diabetes mellitus  |
| E123 | Malnutrition-related diabetes mellitus  |
| E124 | Malnutrition-related diabetes mellitus  |
| E125 | Malnutrition-related diabetes mellitus  |
| E126 | Malnutrition-related diabetes mellitus  |
| E127 | Malnutrition-related diabetes mellitus  |
| E128 | Malnutrition-related diabetes mellitus  |
| E129 | Malnutrition-related diabetes mellitus  |
| E13  | Other specified diabetes mellitus       |
| E130 | Other specified diabetes mellitus       |
| E131 | Other specified diabetes mellitus       |
| E132 | Other specified diabetes mellitus       |
| E133 | Other specified diabetes mellitus       |



|      |                                                                                       |
|------|---------------------------------------------------------------------------------------|
| E134 | Other specified diabetes mellitus                                                     |
| E135 | Other specified diabetes mellitus                                                     |
| E136 | Other specified diabetes mellitus                                                     |
| E137 | Other specified diabetes mellitus                                                     |
| E138 | Other specified diabetes mellitus                                                     |
| E139 | Other specified diabetes mellitus                                                     |
| E14  | Unspecified diabetes mellitus                                                         |
| E140 | Unspecified diabetes mellitus                                                         |
| E141 | Unspecified diabetes mellitus                                                         |
| E142 | Unspecified diabetes mellitus                                                         |
| E143 | Unspecified diabetes mellitus                                                         |
| E144 | Unspecified diabetes mellitus                                                         |
| E145 | Unspecified diabetes mellitus                                                         |
| E146 | Unspecified diabetes mellitus                                                         |
| E147 | Unspecified diabetes mellitus                                                         |
| E148 | Unspecified diabetes mellitus                                                         |
| E149 | Unspecified diabetes mellitus                                                         |
| O240 | Diabetes mellitus in pregnancy: Pre-existing diabetes mellitus, insulin-dependent     |
| O240 | Diabetes mellitus in pregnancy: Pre-existing type 1 diabetes mellitus                 |
| O240 | Diabetes mellitus in pregnancy: Pre-existing diabetes mellitus, non-insulin-dependent |
| O241 | Diabetes mellitus in pregnancy: Pre-existing type 2 diabetes mellitus                 |
| O242 | Diabetes mellitus in pregnancy: Pre-existing malnutrition-related diabetes mellitus   |
| O243 | Diabetes mellitus in pregnancy: Pre-existing diabetes mellitus, unspecified           |
| O249 | Diabetes mellitus in pregnancy, unspecified                                           |

## Arthritis

| READ_COD | READ_DESC                                                     |
|----------|---------------------------------------------------------------|
| E        |                                                               |
| N....    | Musculoskeletal and connective tissue diseases                |
| N0...    | Arthropathies and related disorders                           |
| N00..    | Diffuse diseases of connective tissue                         |
| N000.    | Systemic lupus erythematosus                                  |
| N0000    | Disseminated lupus erythematosus                              |
| N0001    | Libman-Sacks disease                                          |
| N0002    | Drug-induced systemic lupus erythematosus                     |
| N0003    | Systemic lupus erythematosus with organ or system involvement |
| N0004    | Systemic lupus erythematosus with pericarditis                |
| N0005    | Neonatal lupus erythematosus                                  |
| N0006    | Cerebral lupus                                                |
| N000z    | Systemic lupus erythematosus NOS                              |
| N001.    | Scleroderma                                                   |
| N0010    | Progressive systemic sclerosis                                |
| N0011    | CREST syndrome                                                |
| N0012    | Systemic sclerosis induced by drugs and chemicals             |
| N002.    | Sicca (Sjogren's) syndrome                                    |
| N003.    | Dermatomyositis                                               |

|       |                                                                       |
|-------|-----------------------------------------------------------------------|
| N0030 | Juvenile dermatomyositis                                              |
| N0031 | Dermatopolymyositis in neoplastic disease                             |
| N003X | Dermatopolymyositis, unspecified                                      |
| N004. | Polymyositis                                                          |
| N005. | Adult Still's Disease                                                 |
| N006. | Antiphospholipid syndrome                                             |
| N00y. | Other specified diffuse collagen diseases                             |
| N00y0 | Eosinophilic fasciitis                                                |
| N00y1 | Fibrosclerosis systemic                                               |
| N00z. | Collagen disease NOS                                                  |
| N01.. | Arthropathy associated with infections                                |
| N010. | Pyogenic arthritis                                                    |
| N0100 | Pyogenic arthritis of unspecified site                                |
| N0101 | Pyogenic arthritis of the shoulder region                             |
| N0102 | Pyogenic arthritis of the upper arm                                   |
| N0103 | Pyogenic arthritis of the forearm                                     |
| N0104 | Pyogenic arthritis of the hand                                        |
| N0105 | Pyogenic arthritis of the pelvic region and thigh                     |
| N0106 | Pyogenic arthritis of the lower leg                                   |
| N0107 | Pyogenic arthritis of the ankle and foot                              |
| N0108 | Staphylococcal arthritis and polyarthritis                            |
| N0109 | Pneumococcal arthritis and polyarthritis                              |
| N010A | Arthritis in Lyme disease                                             |
| N010x | Pyogenic arthritis of multiple sites                                  |
| N010y | Pyogenic arthritis of other specified sites                           |
| N010z | Pyogenic arthritis NOS                                                |
| N011. | Sexually acquired reactive arthropathy                                |
| N0110 | Sexually acquired reactive arthropathy of unspecified site            |
| N0111 | Sexually acquired reactive arthropathy of the shoulder region         |
| N0112 | Sexually acquired reactive arthropathy of the upper arm               |
| N0113 | Sexually acquired reactive arthropathy of the forearm                 |
| N0114 | Sexually acquired reactive arthropathy of the hand                    |
| N0115 | Sexually acquired reactive arthropathy of the pelvic region and thigh |
| N0116 | Sexually acquired reactive arthropathy of the lower leg               |
| N0117 | Sexually acquired reactive arthropathy of the ankle and foot          |
| N011x | Sexually acquired reactive arthropathy of multiple sites              |
| N011y | Sexually acquired reactive arthropathy of other specified site        |
| N011z | Sexually acquired reactive arthropathy NOS                            |
| N012. | Arthropathy in Behcet's syndrome                                      |
| N0120 | Arthropathy in Behcet's syndrome of unspecified site                  |
| N0121 | Arthropathy in Behcet's syndrome of the shoulder region               |
| N0122 | Arthropathy in Behcet's syndrome of the upper arm                     |
| N0123 | Arthropathy in Behcet's syndrome of the forearm                       |
| N0124 | Arthropathy in Behcet's syndrome of the hand                          |
| N0125 | Arthropathy in Behcet's syndrome of the pelvic region and thigh       |
| N0126 | Arthropathy in Behcet's syndrome of the lower leg                     |
| N0127 | Arthropathy in Behcet's syndrome of the ankle and foot                |
| N012x | Arthropathy in Behcet's syndrome of multiple sites                    |

|       |                                                                                     |
|-------|-------------------------------------------------------------------------------------|
| N012y | Arthropathy in Behcet's syndrome of other specified sites                           |
| N012z | Arthropathy in Behcet's syndrome NOS                                                |
| N013. | Postdysenteric reactive arthropathy                                                 |
| N0130 | Postdysenteric reactive arthropathy of unspecified site                             |
| N0131 | Postdysenteric reactive arthropathy of the shoulder region                          |
| N0132 | Postdysenteric reactive arthropathy of the upper arm                                |
| N0133 | Postdysenteric reactive arthropathy of the forearm                                  |
| N0134 | Postdysenteric reactive arthropathy of the hand                                     |
| N0135 | Postdysenteric reactive arthropathy of the pelvic region and thigh                  |
| N0136 | Postdysenteric reactive arthropathy of the lower leg                                |
| N0137 | Postdysenteric reactive arthropathy of the ankle and foot                           |
| N013x | Postdysenteric reactive arthropathy of multiple sites                               |
| N013y | Postdysenteric reactive arthropathy of other specified sites                        |
| N013z | Postdysenteric reactive arthropathy NOS                                             |
| N014. | Arthropathy associated with other bacterial diseases                                |
| N0140 | Arthropathy associated with other bacterial disease, of unspecified site            |
| N0141 | Arthropathy associated with other bacterial disease, of the shoulder region         |
| N0142 | Arthropathy associated with other bacterial disease, of the upper arm               |
| N0143 | Arthropathy associated with other bacterial disease, of the forearm                 |
| N0144 | Arthropathy associated with other bacterial disease, of the hand                    |
| N0145 | Arthropathy associated with other bacterial disease, of the pelvic region and thigh |
| N0146 | Arthropathy associated with other bacterial disease, of the lower leg               |
| N0147 | Arthropathy associated with other bacterial disease, of the ankle and foot          |
| N0148 | Arthropathy in Whipple's disease                                                    |
| N014x | Arthropathy associated with other bacterial disease, of multiple sites              |
| N014y | Arthropathy associated with other bacterial disease, of other specified site        |
| N014z | Arthropathy associated with other bacterial disease NOS                             |
| N015. | Arthropathy associated with other viral diseases                                    |
| N0150 | Arthropathy associated with other viral disease, of unspecified site                |
| N0151 | Arthropathy associated with other viral disease, of the shoulder region             |
| N0152 | Arthropathy associated with other viral disease, of the upper arm                   |
| N0153 | Arthropathy associated with other viral disease, of the forearm                     |
| N0154 | Arthropathy with other viral disease, of hand                                       |
| N0155 | Arthropathy associated with other viral disease, of the pelvic region and thigh     |
| N0156 | Arthropathy associated with other viral disease, of the lower leg                   |
| N0157 | Arthropathy associated with other viral disease, of the ankle and foot              |
| N015x | Arthropathy associated with other viral disease, of multiple sites                  |
| N015y | Arthropathy associated with other viral disease, of other specified site            |
| N015z | Arthropathy associated with other viral disease NOS                                 |
| N016. | Arthropathy associated with mycoses                                                 |
| N0160 | Arthropathy associated with mycoses, of unspecified site                            |
| N0161 | Arthropathy associated with mycoses, of the shoulder region                         |
| N0162 | Arthropathy associated with mycoses, of the upper arm                               |
| N0163 | Arthropathy associated with mycoses, of the forearm                                 |
| N0164 | Arthropathy associated with mycoses, of the hand                                    |
| N0165 | Arthropathy associated with mycoses, of the pelvic region and thigh                 |
| N0166 | Arthropathy associated with mycoses, of the lower leg                               |
| N0167 | Arthropathy associated with mycoses, of the ankle and foot                          |

|       |                                                                                         |
|-------|-----------------------------------------------------------------------------------------|
| N016x | Arthropathy associated with mycoses, of multiple sites                                  |
| N016y | Arthropathy associated with mycoses, of other specified site                            |
| N016z | Arthropathy associated with mycoses NOS                                                 |
| N017. | Helminthiasis with arthropathy                                                          |
| N0170 | Helminthiasis with arthropathy of unspecified site                                      |
| N0171 | Helminthiasis with arthropathy of the shoulder region                                   |
| N0172 | Helminthiasis with arthropathy of the upper arm                                         |
| N0173 | Helminthiasis with arthropathy of the forearm                                           |
| N0174 | Helminthiasis with arthropathy of the hand                                              |
| N0175 | Helminthiasis with arthropathy of the pelvic region and thigh                           |
| N0176 | Helminthiasis with arthropathy of the lower leg                                         |
| N0177 | Helminthiasis with arthropathy of the ankle and foot                                    |
| N017x | Helminthiasis with arthropathy of multiple sites                                        |
| N017y | Helminthiasis with arthropathy of other specified site                                  |
| N017z | Helminthiasis with arthropathy NOS                                                      |
| N018. | Tuberculous arthritis                                                                   |
| N01w. | Reactive arthropathy, unspecified                                                       |
| N01w0 | Reactive arthropathy of shoulder                                                        |
| N01w1 | Reactive arthropathy of sternoclavicular joint                                          |
| N01w2 | Reactive arthropathy of acromioclavicular joint                                         |
| N01w3 | Reactive arthropathy of elbow                                                           |
| N01w4 | Reactive arthropathy of distal radio-ulnar joint                                        |
| N01w5 | Reactive arthropathy of wrist                                                           |
| N01w6 | Reactive arthropathy of metacarpophalangeal joint                                       |
| N01w7 | Reactive arthropathy of proximal interphalangeal joint of finger                        |
| N01w8 | Reactive arthropathy of distal interphalangeal joint of finger                          |
| N01w9 | Reactive arthropathy of hip                                                             |
| N01wA | Reactive arthropathy of sacro-iliac joint                                               |
| N01wB | Reactive arthropathy of knee                                                            |
| N01wC | Reactive arthropathy of tibio-fibular joint                                             |
| N01wD | Reactive arthropathy of ankle                                                           |
| N01wE | Reactive arthropathy of subtalar joint                                                  |
| N01wF | Reactive arthropathy of talonavicular joint                                             |
| N01wG | Reactive arthropathy of other tarsal joint                                              |
| N01wH | Reactive arthropathy of 1st metatarsophalangeal joint                                   |
| N01wJ | Reactive arthropathy of lesser metatarsophalangeal joint                                |
| N01wK | Reactive arthropathy of interphalangeal joint of toe                                    |
| N01y. | Other infectious and parasitic diseases with arthropathy                                |
| N01y0 | Other infectious and parasitic diseases with arthropathy of unspecified site            |
| N01y1 | Other infectious and parasitic diseases with arthropathy of the shoulder region         |
| N01y2 | Other infectious and parasitic diseases with arthropathy of the upper arm               |
| N01y3 | Other infectious and parasitic diseases with arthropathy of the forearm                 |
| N01y4 | Other infectious and parasitic diseases with arthropathy of the hand                    |
| N01y5 | Other infectious and parasitic diseases with arthropathy of the pelvic region and thigh |
| N01y6 | Other infectious and parasitic diseases with arthropathy of the lower leg               |
| N01y7 | Other infectious and parasitic diseases with arthropathy of the ankle and foot          |
| N01yx | Other infectious and parasitic diseases with arthropathy of multiple sites              |

|       |                                                                                       |
|-------|---------------------------------------------------------------------------------------|
| N01yy | Other infectious and parasitic diseases with arthropathy of other specified sites     |
| N01yz | Other infectious and parasitic diseases with arthropathy NOS                          |
| N01z. | Infective arthritis NOS                                                               |
| N01z0 | Infective arthritis NOS, of unspecified site                                          |
| N01z1 | Infective arthritis NOS, of the shoulder region                                       |
| N01z2 | Infective arthritis NOS, of the upper arm                                             |
| N01z3 | Infective arthritis NOS, of the forearm                                               |
| N01z4 | Infective arthritis NOS, of the hand                                                  |
| N01z5 | Infective arthritis NOS, of the pelvic region and thigh                               |
| N01z6 | Infective arthritis NOS, of the lower leg                                             |
| N01z7 | Infective arthritis NOS, of the ankle and foot                                        |
| N01z8 | Infective arthritis NOS, of shoulder                                                  |
| N01z9 | Infective arthritis NOS, of sternoclavicular joint                                    |
| N01zA | Infective arthritis NOS, of acromioclavicular joint                                   |
| N01zB | Infective arthritis NOS, of elbow                                                     |
| N01zC | Infective arthritis NOS, of distal radio-ulnar joint                                  |
| N01zD | Infective arthritis NOS, of wrist                                                     |
| N01zE | Infective arthritis NOS, of metacarpophalangeal joint                                 |
| N01zF | Infective arthritis NOS, of proximal interphalangeal joint of finger                  |
| N01zG | Infective arthritis NOS, of distal interphalangeal joint of finger                    |
| N01zH | Infective arthritis NOS, of hip                                                       |
| N01zJ | Infective arthritis NOS, of sacro-iliac joint                                         |
| N01zK | Infective arthritis NOS, of knee                                                      |
| N01zL | Infective arthritis NOS, of tibio-fibular joint                                       |
| N01zM | Infective arthritis NOS, of ankle                                                     |
| N01zN | Infective arthritis NOS, of subtalar joint                                            |
| N01zP | Infective arthritis NOS, of talonavicular joint                                       |
| N01zQ | Infective arthritis NOS, of other tarsal joint                                        |
| N01zR | Infective arthritis NOS, of 1st metatarsophalangeal joint                             |
| N01zS | Infective arthritis NOS, of lesser metatarsophalangeal joint                          |
| N01zT | Infective arthritis NOS, of interphalangeal joint of toe                              |
| N01zx | Infective arthritis NOS, of multiple sites                                            |
| N01zy | Infective arthritis NOS, of other specified site                                      |
| N01zz | Infective arthritis NOS                                                               |
| N02.. | Crystal arthropathies                                                                 |
| N020. | Chondrocalcinosis due to dicalcium phosphate crystals                                 |
| N0200 | Chondrocalcinosis due to dicalcium phosphate crystals, of unspecified site            |
| N0201 | Chondrocalcinosis due to dicalcium phosphate crystals, of the shoulder region         |
| N0202 | Chondrocalcinosis due to dicalcium phosphate crystals, of the upper arm               |
| N0203 | Chondrocalcinosis due to dicalcium phosphate crystals, of the forearm                 |
| N0204 | Chondrocalcinosis due to dicalcium phosphate crystals, of the hand                    |
| N0205 | Chondrocalcinosis due to dicalcium phosphate crystals, of the pelvic region and thigh |
| N0206 | Chondrocalcinosis due to dicalcium phosphate crystals, of the lower leg               |
| N0207 | Chondrocalcinosis due to dicalcium phosphate crystals, of the ankle and foot          |
| N020x | Chondrocalcinosis due to dicalcium phosphate crystals, of multiple sites              |
| N020y | Chondrocalcinosis due to dicalcium phosphate crystals, of other specified site        |
| N020z | Chondrocalcinosis due to dicalcium phosphate crystals, NOS                            |

|       |                                                                                 |
|-------|---------------------------------------------------------------------------------|
| N021. | Chondrocalcinosis due to pyrophosphate crystals                                 |
| N0210 | Chondrocalcinosis due to pyrophosphate crystals, of unspecified site            |
| N0211 | Chondrocalcinosis due to pyrophosphate crystals, of the shoulder region         |
| N0212 | Chondrocalcinosis due to pyrophosphate crystals, of the upper arm               |
| N0213 | Chondrocalcinosis due to pyrophosphate crystals, of the forearm                 |
| N0214 | Chondrocalcinosis-pyrophosphate crystals, of the hand                           |
| N0215 | Chondrocalcinosis due to pyrophosphate crystals, of the pelvic region and thigh |
| N0216 | Chondrocalcinosis due to pyrophosphate crystals, of the lower leg               |
| N0217 | Chondrocalcinosis due to pyrophosphate crystals, of the ankle and foot          |
| N021x | Chondrocalcinosis due to pyrophosphate crystals, of multiple sites              |
| N021y | Chondrocalcinosis due to pyrophosphate crystals, of other specified site        |
| N021z | Chondrocalcinosis due to pyrophosphate crystals, NOS                            |
| N022. | Chondrocalcinosis, unspecified                                                  |
| N0220 | Chondrocalcinosis unspecified, of unspecified site                              |
| N0221 | Chondrocalcinosis unspecified, of the shoulder region                           |
| N0222 | Chondrocalcinosis unspecified, of the upper arm                                 |
| N0223 | Chondrocalcinosis unspecified, of the forearm                                   |
| N0224 | Chondrocalcinosis unspecified, of the hand                                      |
| N0225 | Chondrocalcinosis unspecified, of the pelvic region and thigh                   |
| N0226 | Chondrocalcinosis unspecified, of the lower leg                                 |
| N0227 | Chondrocalcinosis unspecified, of the ankle and foot                            |
| N022x | Chondrocalcinosis unspecified, of multiple sites                                |
| N022y | Chondrocalcinosis unspecified, of other specified site                          |
| N022z | Chondrocalcinosis NOS                                                           |
| N023. | Gouty arthritis                                                                 |
| N0230 | Gouty arthritis of unspecified site                                             |
| N0231 | Gouty arthritis of the shoulder region                                          |
| N0232 | Gouty arthritis of the upper arm                                                |
| N0233 | Gouty arthritis of the forearm                                                  |
| N0234 | Gouty arthritis of the hand                                                     |
| N0235 | Gouty arthritis of the pelvic region and thigh                                  |
| N0236 | Gouty arthritis of the lower leg                                                |
| N0237 | Gouty arthritis of the ankle and foot                                           |
| N0238 | Gouty arthritis of toe                                                          |
| N023x | Gouty arthritis of multiple sites                                               |
| N023y | Gouty arthritis of other specified site                                         |
| N023z | Gouty arthritis NOS                                                             |
| N024. | Familial chondrocalcinosis                                                      |
| N02y. | Other crystal arthropathies                                                     |
| N02y0 | Other crystal arthropathies of unspecified site                                 |
| N02y1 | Other crystal arthropathies of the shoulder                                     |
| N02y2 | Other crystal arthropathies of the upper arm                                    |
| N02y3 | Other crystal arthropathies of the forearm                                      |
| N02y4 | Other crystal arthropathies of the hand                                         |
| N02y5 | Other crystal arthropathies of the pelvic region and thigh                      |
| N02y6 | Other crystal arthropathies of the lower leg                                    |
| N02y7 | Other crystal arthropathies of the ankle and foot                               |
| N02y8 | Hydroxyapatite deposition disease                                               |

|       |                                                                      |
|-------|----------------------------------------------------------------------|
| N02yx | Other crystal arthropathies of multiple sites                        |
| N02yy | Other crystal arthropathies of other specified sites                 |
| N02yz | Other crystal arthropathy NOS                                        |
| N02z. | Crystal arthropathy NOS                                              |
| N02z0 | Crystal arthropathy NOS, site unspecified                            |
| N02z1 | Crystal arthropathy NOS, of the shoulder region                      |
| N02z2 | Crystal arthropathy NOS, of the upper arm                            |
| N02z3 | Crystal arthropathy NOS, of the forearm                              |
| N02z4 | Crystal arthropathy NOS, of the hand                                 |
| N02z5 | Crystal arthropathy NOS, of the pelvic region and thigh              |
| N02z6 | Crystal arthropathy NOS, of the lower leg                            |
| N02z7 | Crystal arthropathy NOS, of the ankle and foot                       |
| N02z8 | Crystal arthropathy NOS, of shoulder                                 |
| N02z9 | Crystal arthropathy NOS, of sternoclavicular joint                   |
| N02zA | Crystal arthropathy NOS, of acromioclavicular joint                  |
| N02zB | Crystal arthropathy NOS, of elbow                                    |
| N02zC | Crystal arthropathy NOS, of distal radio-ulnar joint                 |
| N02zD | Crystal arthropathy NOS, of wrist                                    |
| N02zE | Crystal arthropathy NOS, of metacarpophalangeal joint                |
| N02zF | Crystal arthropathy NOS, of proximal interphalangeal joint of finger |
| N02zG | Crystal arthropathy NOS, of distal interphalangeal joint of finger   |
| N02zH | Crystal arthropathy NOS, of hip                                      |
| N02zJ | Crystal arthropathy NOS, of sacro-iliac joint                        |
| N02zK | Crystal arthropathy NOS, of knee                                     |
| N02zL | Crystal arthropathy NOS, of tibio-fibular joint                      |
| N02zM | Crystal arthropathy NOS, of ankle                                    |
| N02zN | Crystal arthropathy NOS, of subtalar joint                           |
| N02zP | Crystal arthropathy NOS, of talonavicular joint                      |
| N02zQ | Crystal arthropathy NOS, of other tarsal joint                       |
| N02zR | Crystal arthropathy NOS, of 1st metatarsophalangeal joint            |
| N02zS | Crystal arthropathy NOS, of lesser metatarsophalangeal joint         |
| N02zT | Crystal arthropathy NOS, of interphalangeal joint of toe             |
| N02zx | Crystal arthropathy NOS, of multiple sites                           |
| N02zy | Crystal arthropathy NOS, of other specified site                     |
| N02zz | Crystal arthropathy NOS                                              |
| N03.. | Arthropathy associated with disorders EC                             |
| N030. | Arthropathy associated with endocrine and metabolic disorder         |
| N0300 | Diabetic cheiroarthropathy                                           |
| N0301 | Diabetic Charcot arthropathy                                         |
| N0302 | Arthropathy in amyloidosis                                           |
| N031. | Arthropathy associated with non-infective gastrointestinal disorders |
| N0310 | Arthropathy in ulcerative colitis                                    |
| N0311 | Arthropathy in Crohn's disease                                       |
| N0312 | Arthropathy in Whipple's disease                                     |
| N0313 | Arthropathy following intestinal bypass                              |
| N032. | Arthropathy associated with haematological disorders                 |
| N0320 | Arthropathy due to haemophilia                                       |
| N033. | Arthropathy associated with dermatological disorders                 |



|       |                                                                                   |
|-------|-----------------------------------------------------------------------------------|
| N034. | Arthropathy associated with respiratory disorders                                 |
| N035. | Neuropathic arthropathy                                                           |
| N036. | Arthropathy due to hypersensitivity reaction                                      |
| N037. | Postimmunization arthropathy                                                      |
| N038. | Reactive arthropathies                                                            |
| N0380 | Postmeningococcal arthritis                                                       |
| N0381 | Postinfective arthropathy in syphilis                                             |
| N039. | Beta-2 microglobulin arthropathy                                                  |
| N03x. | Other general diseases with associated arthropathy                                |
| N03x0 | Arthritis associated with other disease, shoulder                                 |
| N03x1 | Arthritis associated with other disease, sternoclavicular joint                   |
| N03x2 | Arthritis associated with other disease, acromioclavicular joint                  |
| N03x3 | Arthritis associated with other disease, elbow                                    |
| N03x4 | Arthritis associated with other disease, distal radio-ulnar joint                 |
| N03x5 | Arthritis associated with other disease, wrist                                    |
| N03x6 | Arthritis associated with other disease, metacarpophalangeal joint                |
| N03x7 | Arthritis associated with other disease, proximal interphalangeal joint of finger |
| N03x8 | Arthritis associated with other disease, distal interphalangeal joint of finger   |
| N03x9 | Arthritis associated with other disease, hip                                      |
| N03xA | Arthritis associated with other disease, sacro-iliac joint                        |
| N03xB | Arthritis associated with other disease, knee                                     |
| N03xC | Arthritis associated with other disease, tibio-fibular joint                      |
| N03xD | Arthritis associated with other disease, ankle                                    |
| N03xE | Arthritis associated with other disease, subtalar joint                           |
| N03xF | Arthritis associated with other disease, talonavicular joint                      |
| N03xG | Arthritis associated with other disease, other tarsal joint                       |
| N03xH | Arthritis associated with other disease, 1st metatarsophalangeal joint            |
| N03xJ | Arthritis associated with other disease, lesser metatarsophalangeal joint         |
| N03xK | Arthritis associated with other disease, interphalangeal joint of toe             |
| N03y. | Arthropathy associated with other conditions EC                                   |
| N03z. | Arthropathy associated with disorders EC NOS                                      |
| N04.. | Rheumatoid arthritis and other inflammatory polyarthropathies                     |
| N040. | Rheumatoid arthritis                                                              |
| N0400 | Rheumatoid arthritis of cervical spine                                            |
| N0401 | Other rheumatoid arthritis of spine                                               |
| N0402 | Rheumatoid arthritis of shoulder                                                  |
| N0403 | Rheumatoid arthritis of sternoclavicular joint                                    |
| N0404 | Rheumatoid arthritis of acromioclavicular joint                                   |
| N0405 | Rheumatoid arthritis of elbow                                                     |
| N0406 | Rheumatoid arthritis of distal radio-ulnar joint                                  |
| N0407 | Rheumatoid arthritis of wrist                                                     |
| N0408 | Rheumatoid arthritis of metacarpophalangeal joint                                 |
| N0409 | Rheumatoid arthritis of proximal interphalangeal joint of finger                  |
| N040A | Rheumatoid arthritis of distal interphalangeal joint of finger                    |
| N040B | Rheumatoid arthritis of hip                                                       |
| N040C | Rheumatoid arthritis of sacro-iliac joint                                         |
| N040D | Rheumatoid arthritis of knee                                                      |
| N040E | Rheumatoid arthritis of tibio-fibular joint                                       |



|       |                                                                    |
|-------|--------------------------------------------------------------------|
| N040F | Rheumatoid arthritis of ankle                                      |
| N040G | Rheumatoid arthritis of subtalar joint                             |
| N040H | Rheumatoid arthritis of talonavicular joint                        |
| N040J | Rheumatoid arthritis of other tarsal joint                         |
| N040K | Rheumatoid arthritis of 1st metatarsophalangeal joint              |
| N040L | Rheumatoid arthritis of lesser metatarsophalangeal joint           |
| N040M | Rheumatoid arthritis of interphalangeal joint of toe               |
| N040N | Rheumatoid vasculitis                                              |
| N040P | Seronegative rheumatoid arthritis                                  |
| N040Q | Rheumatoid bursitis                                                |
| N040R | Rheumatoid nodule                                                  |
| N040S | Rheumatoid arthritis - multiple joint                              |
| N040T | Flare of rheumatoid arthritis                                      |
| N041. | Felty's syndrome                                                   |
| N042. | Other rheumatoid arthropathy with visceral or systemic involvement |
| N0420 | Rheumatic carditis                                                 |
| N0421 | Rheumatoid lung disease                                            |
| N0422 | Rheumatoid nodule                                                  |
| N042z | Rheumatoid arthropathy with visceral or systemic involvement NOS   |
| N043. | Juvenile rheumatoid arthritis - Still's disease                    |
| N0430 | Juvenile rheumatoid arthropathy unspecified                        |
| N0431 | Acute polyarticular juvenile rheumatoid arthritis                  |
| N0432 | Pauciarticular juvenile rheumatoid arthritis                       |
| N0433 | Monarticular juvenile rheumatoid arthritis                         |
| N043z | Juvenile rheumatoid arthritis NOS                                  |
| N044. | Chronic post-rheumatic arthropathy                                 |
| N045. | Other juvenile arthritis                                           |
| N0450 | Juvenile ankylosing spondylitis                                    |
| N0451 | Juvenile seronegative polyarthritis                                |
| N0452 | Juvenile arthritis in psoriasis                                    |
| N0453 | Juvenile arthritis in Crohn's disease                              |
| N0454 | Juvenile arthritis in ulcerative colitis                           |
| N0455 | Juvenile rheumatoid arthritis                                      |
| N0456 | Pauciarticular onset juvenile chronic arthritis                    |
| N047. | Seropositive erosive rheumatoid arthritis                          |
| N04X. | Seropositive rheumatoid arthritis, unspecified                     |
| N04y. | Other specified inflammatory polyarthropathy                       |
| N04y0 | Rheumatoid lung                                                    |
| N04y1 | Sero negative arthritis                                            |
| N04y2 | Adult-onset Still's disease                                        |
| N04y3 | Remitting seronegative symmetrical synovitis with pitting oedema   |
| N04yz | Other specified inflammatory polyarthropathy NOS                   |
| N04z. | Inflammatory polyarthropathy NOS                                   |
| N05.. | Osteoarthritis and allied disorders                                |
| N050. | Generalised osteoarthritis - OA                                    |
| N0500 | Generalised osteoarthritis of unspecified site                     |
| N0501 | Generalised osteoarthritis of the hand                             |
| N0502 | Generalised osteoarthritis of multiple sites                       |

|       |                                                                       |
|-------|-----------------------------------------------------------------------|
| N0503 | Bouchard's nodes with arthropathy                                     |
| N0504 | Primary generalized osteoarthritis                                    |
| N0505 | Secondary multiple arthrosis                                          |
| N0506 | Erosive osteoarthritis                                                |
| N0507 | Heberden's nodes with arthropathy                                     |
| N050z | Generalised osteoarthritis NOS                                        |
| N051. | Localised, primary osteoarthritis                                     |
| N0510 | Localised, primary osteoarthritis of unspecified site                 |
| N0511 | Localised, primary osteoarthritis of the shoulder region              |
| N0512 | Localised, primary osteoarthritis of the upper arm                    |
| N0513 | Localised, primary osteoarthritis of the forearm                      |
| N0514 | Localised, primary osteoarthritis of the hand                         |
| N0515 | Localised, primary osteoarthritis of the pelvic region and thigh      |
| N0516 | Localised, primary osteoarthritis of the lower leg                    |
| N0517 | Localised, primary osteoarthritis of the ankle and foot               |
| N0518 | Localised, primary osteoarthritis of other specified site             |
| N0519 | Primary coxarthrosis, bilateral                                       |
| N051A | Coxarthrosis resulting from dysplasia, bilateral                      |
| N051B | Primary gonarthrosis, bilateral                                       |
| N051C | Primary arthrosis of first carpometacarpal joints, bilateral          |
| N051D | Localised, primary osteoarthritis of the wrist                        |
| N051E | Localised, primary osteoarthritis of toe                              |
| N051F | Localised, primary osteoarthritis of elbow                            |
| N051G | Osteoarthritis of spinal facet joint                                  |
| N051z | Localised, primary osteoarthritis NOS                                 |
| N052. | Localised, secondary osteoarthritis                                   |
| N0520 | Localised, secondary osteoarthritis of unspecified site               |
| N0521 | Localised, secondary osteoarthritis of the shoulder region            |
| N0522 | Localised, secondary osteoarthritis of the upper arm                  |
| N0523 | Localised, secondary osteoarthritis of the forearm                    |
| N0524 | Localised, secondary osteoarthritis of the hand                       |
| N0525 | Localised, secondary osteoarthritis of the pelvic region and thigh    |
| N0526 | Localised, secondary osteoarthritis of the lower leg                  |
| N0527 | Localised, secondary osteoarthritis of the ankle and foot             |
| N0528 | Localised, secondary osteoarthritis of other specified site           |
| N0529 | Post-traumatic coxarthrosis, bilateral                                |
| N052A | Post-traumatic gonarthrosis, bilateral                                |
| N052B | Post-traumatic arthrosis of first carpometacarpal joints, bilateral   |
| N052C | Post-traumatic gonarthrosis, unilateral                               |
| N052z | Localised, secondary osteoarthritis NOS                               |
| N053. | Localised osteoarthritis, unspecified                                 |
| N0530 | Localised osteoarthritis, unspecified, of unspecified site            |
| N0531 | Localised osteoarthritis, unspecified, of the shoulder region         |
| N0532 | Localised osteoarthritis, unspecified, of the upper arm               |
| N0533 | Localised osteoarthritis, unspecified, of the forearm                 |
| N0534 | Localised osteoarthritis, unspecified, of the hand                    |
| N0535 | Localised osteoarthritis, unspecified, of the pelvic region and thigh |
| N0536 | Localised osteoarthritis, unspecified, of the lower leg               |

|       |                                                                            |
|-------|----------------------------------------------------------------------------|
| N0537 | Localised osteoarthritis, unspecified, of the ankle and foot               |
| N0538 | Localised osteoarthritis, unspecified, of other specified site             |
| N0539 | Arthrosis of first carpometacarpal joint, unspecified                      |
| N053z | Localised osteoarthritis, unspecified, NOS                                 |
| N054. | Oligoarticular osteoarthritis, unspecified                                 |
| N0540 | Oligoarticular osteoarthritis, unspecified, of unspecified sites           |
| N0541 | Oligoarticular osteoarthritis, unspecified, of the shoulder region         |
| N0542 | Oligoarticular osteoarthritis, unspecified, of upper arm                   |
| N0543 | Oligoarticular osteoarthritis, unspecified, of forearm                     |
| N0544 | Oligoarticular osteoarthritis, unspecified, of hand                        |
| N0545 | Oligoarticular osteoarthritis, unspecified, of the pelvic region and thigh |
| N0546 | Oligoarticular osteoarthritis, unspecified, of lower leg                   |
| N0547 | Oligoarticular osteoarthritis, unspecified, of ankle and foot              |
| N0548 | Oligoarticular osteoarthritis, unspecified, of other specified sites       |
| N0549 | Oligoarticular osteoarthritis, unspecified, of multiple sites              |
| N054z | Osteoarthritis of more than one site, unspecified, NOS                     |
| N05z. | Osteoarthritis NOS                                                         |
| N05z0 | Osteoarthritis NOS, of unspecified site                                    |
| N05z1 | Osteoarthritis NOS, of shoulder region                                     |
| N05z2 | Osteoarthritis NOS, of the upper arm                                       |
| N05z3 | Osteoarthritis NOS, of the forearm                                         |
| N05z4 | Osteoarthritis NOS, of the hand                                            |
| N05z5 | Osteoarthritis NOS, pelvic region/thigh                                    |
| N05z6 | Osteoarthritis NOS, of the lower leg                                       |
| N05z7 | Osteoarthritis NOS, of ankle and foot                                      |
| N05z8 | Osteoarthritis NOS, other specified site                                   |
| N05z9 | Osteoarthritis NOS, of shoulder                                            |
| N05zA | Osteoarthritis NOS, of sternoclavicular joint                              |
| N05zB | Osteoarthritis NOS, of acromioclavicular joint                             |
| N05zC | Osteoarthritis NOS, of elbow                                               |
| N05zD | Osteoarthritis NOS, of distal radio-ulnar joint                            |
| N05zE | Osteoarthritis NOS, of wrist                                               |
| N05zF | Osteoarthritis NOS, of metacarpophalangeal joint                           |
| N05zG | Osteoarthritis NOS, of proximal interphalangeal joint of finger            |
| N05zH | Osteoarthritis NOS, of distal interphalangeal joint of finger              |
| N05zJ | Osteoarthritis NOS, of hip                                                 |
| N05zK | Osteoarthritis NOS, of sacro-iliac joint                                   |
| N05zL | Osteoarthritis NOS, of knee                                                |
| N05zM | Osteoarthritis NOS, of tibio-fibular joint                                 |
| N05zN | Osteoarthritis NOS, of ankle                                               |
| N05zP | Osteoarthritis NOS, of subtalar joint                                      |
| N05zQ | Osteoarthritis NOS, of talonavicular joint                                 |
| N05zR | Osteoarthritis NOS, of other tarsal joint                                  |
| N05zS | Osteoarthritis NOS, of 1st metatarsophalangeal joint                       |
| N05zT | Osteoarthritis NOS, of lesser metatarsophalangeal joint                    |
| N05zU | Osteoarthritis NOS, of interphalangeal joint of toe                        |
| N05zz | Osteoarthritis NOS                                                         |
| N06.. | Other and unspecified arthropathies                                        |

|       |                                                                   |
|-------|-------------------------------------------------------------------|
| N060. | Kaschin - Beck disease                                            |
| N0600 | Kaschin-Beck disease of unspecified site                          |
| N0601 | Kaschin-Beck disease of the shoulder region                       |
| N0602 | Kaschin-Beck disease of the upper arm                             |
| N0603 | Kaschin-Beck disease of the forearm                               |
| N0604 | Kaschin-Beck disease of the hand                                  |
| N0605 | Kaschin-Beck disease of the pelvic region and thigh               |
| N0606 | Kaschin-Beck disease of the lower leg                             |
| N0607 | Kaschin-Beck disease of the ankle and foot                        |
| N0608 | Kaschin-Beck disease of other specified site                      |
| N0609 | Kaschin-Beck disease of multiple sites                            |
| N060z | Kaschin-Beck disease NOS                                          |
| N061. | Traumatic arthropathy                                             |
| N0610 | Traumatic arthropathy of unspecified site                         |
| N0611 | Traumatic arthropathy of the shoulder region                      |
| N0612 | Traumatic arthropathy of the upper arm                            |
| N0613 | Traumatic arthropathy of the forearm                              |
| N0614 | Traumatic arthropathy of the hand                                 |
| N0615 | Traumatic arthropathy of the pelvic region and thigh              |
| N0616 | Traumatic arthropathy of the lower leg                            |
| N0617 | Traumatic arthropathy of the ankle and foot                       |
| N0618 | Traumatic arthropathy of other specified site                     |
| N0619 | Traumatic arthropathy of multiple sites                           |
| N061A | Traumatic arthropathy of shoulder                                 |
| N061B | Traumatic arthropathy of sternoclavicular joint                   |
| N061C | Traumatic arthropathy of acromioclavicular joint                  |
| N061D | Traumatic arthropathy-elbow                                       |
| N061E | Traumatic arthropathy of distal radio-ulnar joint                 |
| N061F | Traumatic arthropathy-wrist                                       |
| N061G | Traumatic arthropathy of metacarpophalangeal joint                |
| N061H | Traumatic arthropathy of proximal interphalangeal joint of finger |
| N061J | Traumatic arthropathy of distal interphalangeal joint of finger   |
| N061K | Traumatic arthropathy-hip                                         |
| N061L | Traumatic arthropathy of sacro-iliac joint                        |
| N061M | Traumatic arthropathy-knee                                        |
| N061N | Traumatic arthropathy of tibio-fibular joint                      |
| N061P | Traumatic arthropathy-ankle                                       |
| N061Q | Traumatic arthropathy of subtalar joint                           |
| N061R | Traumatic arthropathy of talonavicular joint                      |
| N061S | Traumatic arthropathy of other tarsal joint                       |
| N061T | Traumatic arthropathy of 1st metatarsophalangeal joint            |
| N061U | Traumatic arthropathy of lesser metatarsophalangeal joint         |
| N061V | Traumatic arthropathy of interphalangeal joint of toe             |
| N061z | Traumatic arthropathy NOS                                         |
| N062. | Allergic arthritis                                                |
| N0620 | Allergic arthritis of unspecified site                            |
| N0621 | Allergic arthritis of the shoulder region                         |
| N0622 | Allergic arthritis of the upper arm                               |

|       |                                                                   |
|-------|-------------------------------------------------------------------|
| N0623 | Allergic arthritis of the forearm                                 |
| N0624 | Allergic arthritis of the hand                                    |
| N0625 | Allergic arthritis of the pelvic region and thigh                 |
| N0626 | Allergic arthritis of the lower leg                               |
| N0627 | Allergic arthritis of the ankle and foot                          |
| N0628 | Allergic arthritis of other specified site                        |
| N0629 | Allergic arthritis of multiple sites                              |
| N062z | Allergic arthritis NOS                                            |
| N063. | Climacteric arthritis                                             |
| N0630 | Climacteric arthritis of unspecified site                         |
| N0631 | Climacteric arthritis of the shoulder region                      |
| N0632 | Climacteric arthritis of the upper arm                            |
| N0633 | Climacteric arthritis of the forearm                              |
| N0634 | Climacteric arthritis of the hand                                 |
| N0635 | Climacteric arthritis of the pelvic region and thigh              |
| N0636 | Climacteric arthritis of the lower leg                            |
| N0637 | Climacteric arthritis of the ankle and foot                       |
| N0638 | Climacteric arthritis of other specified site                     |
| N0639 | Climacteric arthritis of multiple sites                           |
| N063z | Climacteric arthritis NOS                                         |
| N064. | Transient arthropathy                                             |
| N0640 | Transient arthropathy of unspecified site                         |
| N0641 | Transient arthropathy of the shoulder region                      |
| N0642 | Transient arthropathy of the upper arm                            |
| N0643 | Transient arthropathy of the forearm                              |
| N0644 | Transient arthropathy of the hand                                 |
| N0645 | Transient arthropathy of the pelvic region and thigh              |
| N0646 | Transient arthropathy of the lower leg                            |
| N0647 | Transient arthropathy of the ankle and foot                       |
| N0648 | Transient arthropathy of other specified site                     |
| N0649 | Transient arthropathy of multiple sites                           |
| N064A | Transient arthropathy of shoulder                                 |
| N064B | Transient arthropathy of sternoclavicular joint                   |
| N064C | Transient arthropathy of acromioclavicular joint                  |
| N064D | Transient arthropathy-elbow                                       |
| N064E | Transient arthropathy of distal radio-ulnar joint                 |
| N064F | Transient arthropathy-wrist                                       |
| N064G | Transient arthropathy of metacarpophalangeal joint                |
| N064H | Transient arthropathy of proximal interphalangeal joint of finger |
| N064J | Transient arthropathy of distal interphalangeal joint of finger   |
| N064K | Transient arthropathy-hip                                         |
| N064L | Transient arthropathy of sacro-iliac joint                        |
| N064M | Transient arthropathy-knee                                        |
| N064N | Transient arthropathy of tibio-fibular joint                      |
| N064P | Transient arthropathy-ankle                                       |
| N064Q | Transient arthropathy of subtalar joint                           |
| N064R | Transient arthropathy of talonavicular joint                      |
| N064S | Transient arthropathy of other tarsal joint                       |

|       |                                                            |
|-------|------------------------------------------------------------|
| N064T | Transient arthropathy of 1st metatarsophalangeal joint     |
| N064U | Transient arthropathy of lesser metatarsophalangeal joint  |
| N064V | Transient arthropathy of interphalangeal joint of toe      |
| N064z | Transient arthropathy NOS                                  |
| N065. | Unspecified polyarthropathy or polyarthritis               |
| N0650 | Unspecified polyarthropathy of unspecified site            |
| N0651 | Unspecified polyarthropathy of the shoulder region         |
| N0652 | Unspecified polyarthropathy of the upper arm               |
| N0653 | Unspecified polyarthropathy of the forearm                 |
| N0654 | Unspecified polyarthropathy of the hand                    |
| N0655 | Unspecified polyarthropathy of the pelvic region and thigh |
| N0656 | Unspecified polyarthropathy of the lower leg               |
| N0657 | Unspecified polyarthropathy of the ankle and foot          |
| N0658 | Unspecified polyarthropathy of other specified site        |
| N0659 | Unspecified polyarthropathy of multiple sites              |
| N065A | Generalised arthritis                                      |
| N065z | Unspecified polyarthropathy or polyarthritis NOS           |
| N066. | Unspecified monoarthritis                                  |
| N0660 | Unspecified monoarthritis of unspecified site              |
| N0661 | Unspecified monoarthritis of the shoulder region           |
| N0662 | Unspecified monoarthritis of the upper arm                 |
| N0663 | Unspecified monoarthritis of the forearm                   |
| N0664 | Unspecified monoarthritis of the hand                      |
| N0665 | Unspecified monoarthritis of the pelvic region and thigh   |
| N0666 | Unspecified monoarthritis of the lower leg                 |
| N0667 | Unspecified monoarthritis of the ankle and foot            |
| N0668 | Unspecified monoarthritis of other specified site          |
| N066z | Unspecified monoarthritis NOS                              |
| N067. | Ochronotic arthropathy                                     |
| N068. | Haemophilic arthropathy                                    |
| N069. | Arthropathy in neoplastic disease                          |
| N06y. | Other specified arthropathy                                |
| N06y0 | Other specified arthropathy of unspecified site            |
| N06y1 | Other specified arthropathy of the shoulder region         |
| N06y2 | Other specified arthropathy of the upper arm               |
| N06y3 | Other specified arthropathy of the forearm                 |
| N06y4 | Other specified arthropathy of the hand                    |
| N06y5 | Other specified arthropathy of the pelvic region and thigh |
| N06y6 | Other specified arthropathy of the lower leg               |
| N06y7 | Other specified arthropathy of the ankle and foot          |
| N06y8 | Other specified arthropathy of other specified site        |
| N06y9 | Other specified arthropathy of multiple sites              |
| N06yz | Other specified arthropathy NOS                            |
| N06z. | Arthropathy NOS                                            |
| N06z0 | Arthropathy NOS, of unspecified site                       |
| N06z1 | Arthropathy NOS, of the shoulder region                    |
| N06z2 | Arthropathy NOS, of the upper arm                          |
| N06z3 | Arthropathy NOS, of the forearm                            |

|       |                                                        |
|-------|--------------------------------------------------------|
| N06z4 | Arthropathy NOS, of the hand                           |
| N06z5 | Arthropathy NOS, of the pelvic region and thigh        |
| N06z6 | Arthropathy NOS, of the lower leg                      |
| N06z7 | Arthropathy NOS, of the ankle and foot                 |
| N06z8 | Arthropathy NOS, of other specified site               |
| N06z9 | Arthropathy NOS, of multiple sites                     |
| N06zA | Acute arthritis                                        |
| N06zB | Chronic arthritis                                      |
| N06zz | Arthropathy NOS                                        |
| N07.. | Internal derangement of knee                           |
| N070. | Medial meniscus derangement                            |
| N0700 | Medial meniscus derangement, unspecified               |
| N0701 | Old bucket handle tear of medial meniscus              |
| N0702 | Medial meniscus, anterior horn derangement             |
| N0703 | Medial meniscus, posterior horn derangement            |
| N0704 | Parrot beak tear of posterior horn of medial meniscus  |
| N0705 | Peripheral detachment of medial meniscus               |
| N0706 | Radial tear of medial meniscus                         |
| N0707 | Horizontal cleavage tear of medial meniscus            |
| N0708 | Multiple tears of medial meniscus                      |
| N0709 | Cyst of medial meniscus                                |
| N070A | Old tear of medial meniscus                            |
| N070B | Old tear of posterior horn of medial meniscus          |
| N070z | Medial meniscus derangement NOS                        |
| N071. | Lateral meniscus derangement                           |
| N0710 | Lateral meniscus derangement unspecified               |
| N0711 | Old bucket handle tear of lateral meniscus             |
| N0712 | Lateral meniscus, anterior horn derangement            |
| N0713 | Lateral meniscus, posterior horn derangement           |
| N0714 | Lateral meniscus derangement NOS                       |
| N0715 | Parrot beak tear of posterior horn of lateral meniscus |
| N0716 | Peripheral detachment of lateral meniscus              |
| N0717 | Radial tear of lateral meniscus                        |
| N0718 | Horizontal cleavage tear of lateral meniscus           |
| N0719 | Multiple tears of lateral meniscus                     |
| N071A | Cyst of lateral meniscus                               |
| N071B | Discoid lateral meniscus                               |
| N071C | Old tear of lateral meniscus                           |
| N072. | Meniscus derangement NEC                               |
| N0720 | Old torn meniscus of knee                              |
| N0721 | Degenerative lesion of articular cartilage of knee     |
| N0722 | Cyst of semilunar cartilage                            |
| N073. | Loose body in knee                                     |
| N074. | Chondromalacia patellae                                |
| N07y. | Other internal knee derangement                        |
| N07y0 | Old lateral collateral ligament disruption             |
| N07y1 | Old medial collateral ligament disruption              |
| N07y2 | Old anterior cruciate ligament disruption              |

|       |                                                                     |
|-------|---------------------------------------------------------------------|
| N07y3 | Old posterior cruciate ligament disruption                          |
| N07y4 | Old capsular knee ligament disruption                               |
| N07y5 | Locked knee                                                         |
| N07y6 | Patellofemoral maltracking                                          |
| N07y7 | Old partial tear lateral collateral ligament                        |
| N07y8 | Old complete tear lateral collateral ligament                       |
| N07y9 | Old posterolateral capsular complex tear                            |
| N07yA | Old partial tear medial collateral ligament                         |
| N07yB | Old complete tear medial collateral ligament                        |
| N07yC | Old medial capsular complex tear                                    |
| N07yD | Old partial tear anterior cruciate ligament                         |
| N07yE | Old complete tear anterior cruciate ligament                        |
| N07yF | Old partial tear posterior cruciate ligament                        |
| N07yG | Old complete tear posterior cruciate ligament                       |
| N07yH | Locking knee                                                        |
| N07yJ | Adhesions of knee joint                                             |
| N07yy | Other old knee ligament disruption                                  |
| N07yz | Other internal knee derangement NOS                                 |
| N07z. | Internal knee derangement NOS                                       |
| N08.. | Other derangement of joint                                          |
| N080. | Articular cartilage disorder, excluding the knee                    |
| N0800 | Articular cartilage disorder, of unspecified site                   |
| N0801 | Articular cartilage disorder of the shoulder region                 |
| N0802 | Articular cartilage disorder of the upper arm                       |
| N0803 | Articular cartilage disorder of the forearm                         |
| N0804 | Articular cartilage disorder of the hand                            |
| N0805 | Articular cartilage disorder of the pelvic region and thigh         |
| N0806 | Articular cartilage disorder of the ankle and foot                  |
| N0807 | Articular cartilage disorder of other specified site                |
| N0808 | Articular cartilage disorder of multiple sites                      |
| N0809 | Hill-Sachs lesion                                                   |
| N080A | Reverse Hill-Sachs lesion                                           |
| N080B | Articular cartilage disorder of other joints of the shoulder girdle |
| N080C | Chondrolysis of the femoral head                                    |
| N080z | Articular cartilage disorder NOS                                    |
| N081. | Loose body in joint, excluding the knee                             |
| N0810 | Loose body in joint, unspecified joint                              |
| N0811 | Loose body in joint of shoulder region                              |
| N0812 | Loose body in joint of upper arm                                    |
| N0813 | Loose body in joint of forearm                                      |
| N0814 | Loose body in joint of hand                                         |
| N0815 | Loose body in joint of pelvic region and thigh                      |
| N0816 | Loose body in joint of ankle and foot                               |
| N0817 | Loose body in joint, other specified joint                          |
| N0818 | Loose joint body in multiple joints                                 |
| N0819 | Loose body in shoulder joint                                        |
| N081A | Loose body in other joint of shoulder girdle                        |
| N081B | Loose body in elbow joint                                           |



|       |                                                              |
|-------|--------------------------------------------------------------|
| N081C | Loose body in wrist joint                                    |
| N081D | Loose body in hip joint                                      |
| N081E | Loose body in other joint of pelvic girdle                   |
| N081F | Loose body in ankle joint                                    |
| N081G | Loose body in foot joint                                     |
| N081z | Loose body in joint (excluding the knee) NOS                 |
| N082. | Pathological dislocation                                     |
| N0820 | Pathological dislocation of unspecified site                 |
| N0821 | Pathological dislocation of the shoulder region              |
| N0822 | Pathological dislocation of the upper arm                    |
| N0823 | Pathological dislocation of the forearm                      |
| N0824 | Pathological dislocation of the hand                         |
| N0825 | Pathological dislocation of the pelvic region and thigh      |
| N0826 | Pathological dislocation of the lower leg                    |
| N0827 | Pathological dislocation of the ankle and foot               |
| N0828 | Pathological dislocation of other specified site             |
| N0829 | Pathological dislocation of multiple joints                  |
| N082A | Pathological dislocation of the shoulder joint               |
| N082B | Pathological dislocation of other joint of shoulder girdle   |
| N082C | Pathological dislocation of humero-ulnar joint               |
| N082D | Pathological dislocation of superior radio-ulnar joint       |
| N082E | Pathological dislocation of radial head                      |
| N082F | Pathological dislocation of inferior radio-ulnar joint       |
| N082G | Pathological dislocation of wrist joint                      |
| N082H | Pathological dislocation of 1st carpometacarpal joint        |
| N082J | Pathological dislocation of other carpometacarpal joint      |
| N082K | Pathological dislocation of metacarpophalangeal joint        |
| N082L | Pathological dislocation of proximal interphalangeal joint   |
| N082M | Pathological dislocation of distal interphalangeal joint     |
| N082N | Neuromuscular dislocation of the hip                         |
| N082P | Other acquired pathological dislocation of the hip           |
| N082Q | Pathological dislocation of knee joint                       |
| N082R | Pathological dislocation of patellofemoral joint             |
| N082S | Pathological dislocation of ankle joint                      |
| N082T | Pathological dislocation of subtalar joint                   |
| N082U | Pathological dislocation of midtarsal joint                  |
| N082V | Pathological dislocation of tarsometatarsal joint            |
| N082W | Pathological dislocation of 1st metatarsophalangeal joint    |
| N082X | Pathological dislocation of lesser metatarsophalangeal joint |
| N082Y | Pathological dislocation of toe interphalangeal joint        |
| N082Z | Non-traumatic subluxation of acromioclavicular joint         |
| N082z | Pathological dislocation NOS                                 |
| N083. | Recurrent dislocation of joint                               |
| N0830 | Recurrent joint dislocation, of unspecified site             |
| N0831 | Recurrent joint dislocation, of the shoulder region          |
| N0832 | Recurrent joint dislocation, of the upper arm                |
| N0833 | Recurrent joint dislocation, of the forearm                  |
| N0834 | Recurrent joint dislocation, of the hand                     |

|       |                                                              |
|-------|--------------------------------------------------------------|
| N0835 | Recurrent joint dislocation, of the pelvic region and thigh  |
| N0836 | Recurrent joint dislocation, of the lower leg                |
| N0837 | Recurrent joint dislocation, of the ankle and foot           |
| N0838 | Recurrent joint dislocation, of other specified site         |
| N0839 | Recurrent dislocation of multiple joints                     |
| N083A | Recurrent dislocation of shoulder - anterior                 |
| N083B | Recurrent dislocation of shoulder - posterior                |
| N083C | Recurrent subluxation of shoulder - anterior                 |
| N083D | Recurrent subluxation of shoulder - posterior                |
| N083E | Recurrent dislocation of shoulder - inferior                 |
| N083F | Recurrent subluxation of shoulder - inferior                 |
| N083G | Recurrent dislocation of shoulder - anterior                 |
| N083H | Recurrent subluxation of shoulder - anterior                 |
| N083J | Recurrent dislocation of shoulder - multidirectional         |
| N083K | Recurrent subluxation of shoulder - multidirectional         |
| N083L | Habitual dislocation of the shoulder                         |
| N083M | Habitual subluxation of the shoulder                         |
| N083N | Recurrent dislocation of elbow                               |
| N083P | Recurrent subluxation of elbow                               |
| N083Q | Recurrent dislocation of superior radio-ulnar joint          |
| N083R | Recurrent subluxation of superior radio-ulnar joint          |
| N083S | Recurrent dislocation of radial head                         |
| N083T | Recurrent subluxation of radial head                         |
| N083U | Recurrent dislocation of inferior radio-ulnar joint          |
| N083V | Recurrent subluxation of inferior radio-ulnar joint          |
| N083W | Recurrent dislocation of wrist                               |
| N083X | Carpal instability                                           |
| N083Y | Recurrent subluxation of wrist                               |
| N083Z | Carpal instability, dorsal intercalated segment instability  |
| N083a | Carpal instability, ventral intercalated segment instability |
| N083b | Carpal instability, ulnar translocation                      |
| N083c | Carpal instability, dorsal subluxation                       |
| N083d | Carpal instability, other                                    |
| N083e | Recurrent dislocation of carpometacarpal joint               |
| N083f | Recurrent subluxation of carpometacarpal joint               |
| N083g | Recurrent dislocation of metacarpophalangeal joint           |
| N083h | Recurrent subluxation of metacarpophalangeal joint           |
| N083j | Recurrent dislocation of interphalangeal joint               |
| N083k | Recurrent subluxation of interphalangeal joint               |
| N083l | Recurrent dislocation of the hip                             |
| N083m | Recurrent dislocation of other pelvic joints                 |
| N083n | Recurrent dislocation of the knee                            |
| N083p | Recurrent dislocation of the patella                         |
| N083q | Recurrent subluxation of the patella                         |
| N083r | Habitual dislocation of the patella                          |
| N083s | Recurrent dislocation of the ankle                           |
| N083t | Recurrent subluxation of the ankle                           |
| N083u | Recurrent dislocation of foot joint                          |

|       |                                                       |
|-------|-------------------------------------------------------|
| N083v | Recurrent subluxation of the subtalar joint           |
| N083w | Recurrent subluxation of other foot joint             |
| N083x | Recurrent subluxation of the hip joint                |
| N083z | Recurrent joint dislocation NOS                       |
| N084. | Contracture of joint                                  |
| N0840 | Joint contracture of unspecified site                 |
| N0841 | Joint contracture of the shoulder region              |
| N0842 | Joint contracture of the upper arm                    |
| N0843 | Joint contracture of the forearm                      |
| N0844 | Joint contracture of the hand                         |
| N0845 | Joint contracture of the pelvic region and thigh      |
| N0846 | Joint contracture of the lower leg                    |
| N0847 | Joint contracture of the ankle and foot               |
| N0848 | Joint contracture of other specified site             |
| N0849 | Contracture of multiple joints                        |
| N084A | Flexion contracture-shoulder                          |
| N084B | Extension contracture-shoulder                        |
| N084C | Abduction contracture-shoulder                        |
| N084D | Adduction contracture-shoulder                        |
| N084E | Internal rotation contracture-shoulder                |
| N084F | External rotation contracture-shoulder                |
| N084G | Flexion contracture - elbow                           |
| N084H | Extension contracture - elbow                         |
| N084J | Pronation contracture - forearm                       |
| N084K | Supination contracture - forearm                      |
| N084L | Flexion contracture - wrist                           |
| N084M | Extension contracture of the wrist                    |
| N084N | Ulnar deviation contracture of the wrist              |
| N084P | Radial deviation contracture of the wrist             |
| N084Q | Flexion contracture of metacarpophalangeal joint      |
| N084R | Extension contracture of metacarpophalangeal joint    |
| N084S | Flexion contracture of proximal interphalangeal joint |
| N084T | Flexion contracture of distal interphalangeal joint   |
| N084U | Flexion contracture of hip                            |
| N084V | Extension contracture of hip                          |
| N084W | Abduction contracture of hip                          |
| N084X | Adduction contracture of hip                          |
| N084Y | Internal rotation contracture of hip                  |
| N084Z | External rotation contracture of hip                  |
| N084a | Flexion contracture of the knee                       |
| N084b | Equinus contracture of the ankle                      |
| N084c | Calcaneus contracture of the ankle                    |
| N084d | Flexion contracture of metatarsophalangeal joint      |
| N084e | Extension contracture of metatarsophalangeal joint    |
| N084f | Flexion contracture of toe interphalangeal joint      |
| N084g | Extension contracture of toe interphalangeal joint    |
| N084z | Contracture of joint NOS                              |
| N085. | Ankylosis of joint                                    |

|       |                                                     |
|-------|-----------------------------------------------------|
| N0850 | Joint ankylosis of unspecified site                 |
| N0851 | Joint ankylosis of the shoulder region              |
| N0852 | Joint ankylosis of the upper arm                    |
| N0853 | Joint ankylosis of the forearm                      |
| N0854 | Joint ankylosis of the hand                         |
| N0855 | Joint ankylosis of the pelvic region and thigh      |
| N0856 | Joint ankylosis of the lower leg                    |
| N0857 | Joint ankylosis of the ankle and foot               |
| N0858 | Joint ankylosis of other specified site             |
| N0859 | Ankylosis of multiple joints                        |
| N085A | Ankylosis of the shoulder joint                     |
| N085B | Ankylosis of other joint of the shoulder girdle     |
| N085C | Ankylosis of the elbow joint                        |
| N085D | Ankylosis of the superior radio-ulnar joint         |
| N085E | Ankylosis of the inferior radio-ulnar joint         |
| N085F | Ankylosis of the wrist joint                        |
| N085G | Ankylosis of the 1st carpometacarpal joint          |
| N085H | Ankylosis of other carpometacarpal joint            |
| N085J | Ankylosis of metacarpophalangeal joint              |
| N085K | Ankylosis of proximal interphalangeal joint         |
| N085L | Ankylosis of distal interphalangeal joint           |
| N085M | Ankylosis of the hip joint                          |
| N085N | Ankylosis of other pelvic joint                     |
| N085P | Ankylosis of the knee joint                         |
| N085Q | Ankylosis of the ankle joint                        |
| N085R | Ankylosis of the subtalar joint                     |
| N085S | Ankylosis of other tarsal joint                     |
| N085T | Ankylosis of metatarsophalangeal joint              |
| N085U | Ankylosis of toe joint                              |
| N085z | Ankylosis of joint NOS                              |
| N086. | Unspecified intrapelvic protrusio acetabuli         |
| N0860 | Protrusio acetabuli of unspecified site             |
| N0861 | Protrusio acetabuli of the pelvic region and thigh  |
| N086z | Protrusio acetabuli NOS                             |
| N087. | Fibrocartilage lesion of joint                      |
| N0870 | Bankart lesion                                      |
| N0871 | Reverse Bankart lesion                              |
| N0872 | Glenoid labrum detachment                           |
| N0873 | Glenoid labrum tear                                 |
| N0874 | Triangular fibrocartilage tear                      |
| N0875 | Triangular fibrocartilage detachment                |
| N0876 | Acetabular labrum detachment                        |
| N0877 | Acetabular labrum tear                              |
| N0878 | Snapping shoulder                                   |
| N08y. | Other joint derangement NEC                         |
| N08y0 | Other joint derangement NEC, of unspecified site    |
| N08y1 | Other joint derangement NEC, of the shoulder region |
| N08y2 | Other joint derangement NEC, of the upper arm       |

|       |                                                             |
|-------|-------------------------------------------------------------|
| N08y3 | Other joint derangement NEC, of the forearm                 |
| N08y4 | Other joint derangement NEC, of the hand                    |
| N08y5 | Other joint derangement NEC, of the pelvic region and thigh |
| N08y6 | Other joint derangement NEC, of the lower leg               |
| N08y7 | Other joint derangement NEC, of the ankle and foot          |
| N08y8 | Other joint derangement NEC, of other specified site        |
| N08y9 | Other joint derangement NEC, of multiple sites              |
| N08yA | Flail joint                                                 |
| N08yB | Shoulder joint unstable                                     |
| N08yz | Other joint derangement NEC, NOS                            |
| N08z. | Joint derangement NOS                                       |
| N08z0 | Joint derangement NOS, of unspecified site                  |
| N08z1 | Joint derangement NOS, of the shoulder region               |
| N08z2 | Joint derangement NOS, of the upper arm                     |
| N08z3 | Joint derangement NOS, of the forearm                       |
| N08z4 | Joint derangement NOS, of the hand                          |
| N08z5 | Joint derangement NOS, of the pelvic region and thigh       |
| N08z6 | Joint derangement NOS, of the ankle and foot                |
| N08z7 | Joint derangement NOS, of other specified site              |
| N08z8 | Joint derangement NOS, of multiple sites                    |
| N08zz | Joint derangement NOS                                       |
| N09.. | Other and unspecified joint disorders                       |
| N090. | Effusion of joint                                           |
| N0900 | Joint effusion of unspecified site                          |
| N0901 | Joint effusion of the shoulder region                       |
| N0902 | Joint effusion of the upper arm                             |
| N0903 | Joint effusion of the forearm                               |
| N0904 | Joint effusion of the hand                                  |
| N0905 | Joint effusion of the pelvic region and thigh               |
| N0906 | Joint effusion of the lower leg                             |
| N0907 | Joint effusion of the ankle and foot                        |
| N0908 | Joint effusion of other specified site                      |
| N0909 | Effusion of multiple joints                                 |
| N090A | Effusion of shoulder                                        |
| N090B | Effusion of sternoclavicular joint                          |
| N090C | Effusion of acromioclavicular joint                         |
| N090D | Effusion of elbow                                           |
| N090E | Effusion of distal radio-ulnar joint                        |
| N090F | Effusion of wrist                                           |
| N090G | Effusion of metacarpophalangeal joint                       |
| N090H | Effusion of proximal interphalangeal joint of finger        |
| N090J | Effusion of distal interphalangeal joint of finger          |
| N090K | Effusion of hip                                             |
| N090L | Effusion of sacro-iliac joint                               |
| N090M | Effusion of knee                                            |
| N090N | Effusion of tibio-fibular joint                             |
| N090P | Effusion of ankle                                           |
| N090Q | Effusion of subtalar joint                                  |

|       |                                                       |
|-------|-------------------------------------------------------|
| N090R | Effusion of talonavicular joint                       |
| N090S | Effusion of other tarsal joint                        |
| N090T | Effusion of 1st metatarsophalangeal joint             |
| N090U | Effusion of lesser metatarsophalangeal joint          |
| N090V | Effusion of interphalangeal joint of toe              |
| N090W | Intermittent hydrarthrosis                            |
| N090X | Chronic joint effusion                                |
| N090Y | Acute joint effusion                                  |
| N090z | Effusion of joint NOS                                 |
| N091. | Haemarthrosis                                         |
| N0910 | Haemarthrosis of unspecified site                     |
| N0911 | Haemarthrosis of the shoulder region                  |
| N0912 | Haemarthrosis of the upper arm                        |
| N0913 | Haemarthrosis of the forearm                          |
| N0914 | Haemarthrosis of the hand                             |
| N0915 | Haemarthrosis of the pelvic region and thigh          |
| N0916 | Haemarthrosis of the lower leg                        |
| N0917 | Haemarthrosis of the ankle and foot                   |
| N0918 | Haemarthrosis of other specified site                 |
| N0919 | Haemarthrosis of multiple joints                      |
| N091A | Haemarthrosis of shoulder                             |
| N091B | Haemarthrosis of sternoclavicular joint               |
| N091C | Haemarthrosis of acromioclavicular joint              |
| N091D | Haemarthrosis of elbow                                |
| N091E | Haemarthrosis of distal radio-ulnar joint             |
| N091F | Haemarthrosis of wrist                                |
| N091G | Haemarthrosis of MCP joint                            |
| N091H | Haemarthrosis of PIP joint of finger                  |
| N091J | Haemarthrosis of DIP joint of finger                  |
| N091K | Haemarthrosis of hip                                  |
| N091L | Haemarthrosis of sacro-iliac joint                    |
| N091M | Haemarthrosis of knee                                 |
| N091N | Haemarthrosis of tibio-fibular joint                  |
| N091P | Haemarthrosis of ankle                                |
| N091Q | Haemarthrosis of subtalar joint                       |
| N091R | Haemarthrosis of talonavicular joint                  |
| N091S | Haemarthrosis of other tarsal joint                   |
| N091T | Haemarthrosis-1st metatarsophalangeal joint           |
| N091U | Haemarthrosis of lesser metatarsophalangeal joint     |
| N091V | Haemarthrosis of interphalangeal joint of toe         |
| N091z | Haemarthrosis NOS                                     |
| N092. | Villonodular synovitis                                |
| N0920 | Villonodular synovitis of unspecified site            |
| N0921 | Villonodular synovitis of the shoulder region         |
| N0922 | Villonodular synovitis of the upper arm               |
| N0923 | Villonodular synovitis of the forearm                 |
| N0924 | Villonodular synovitis of the hand                    |
| N0925 | Villonodular synovitis of the pelvic region and thigh |

|       |                                                                    |
|-------|--------------------------------------------------------------------|
| N0926 | Villonodular synovitis of the lower leg                            |
| N0927 | Villonodular synovitis of the ankle and foot                       |
| N0928 | Villonodular synovitis of other specified site                     |
| N0929 | Villonodular synovitis of multiple sites                           |
| N092A | Villonodular synovitis of shoulder joint                           |
| N092B | Villonodular synovitis of sternoclavicular joint                   |
| N092C | Villonodular synovitis of acromioclavicular joint                  |
| N092D | Villonodular synovitis of elbow                                    |
| N092E | Villonodular synovitis of distal radio-ulnar joint                 |
| N092F | Villonodular synovitis of wrist                                    |
| N092G | Villonodular synovitis of metacarpophalangeal joint                |
| N092H | Villonodular synovitis of proximal interphalangeal joint of finger |
| N092J | Villonodular synovitis of distal interphalangeal joint of finger   |
| N092K | Villonodular synovitis of hip                                      |
| N092L | Villonodular synovitis of sacro-iliac joint                        |
| N092M | Villonodular synovitis of knee                                     |
| N092N | Villonodular synovitis of tibio-fibular joint                      |
| N092P | Villonodular synovitis of ankle                                    |
| N092Q | Villonodular synovitis of subtalar joint                           |
| N092R | Villonodular synovitis of talonavicular joint                      |
| N092S | Villonodular synovitis of other tarsal joint                       |
| N092T | Villonodular synovitis of 1st metatarsophalangeal joint            |
| N092U | Villonodular synovitis of lesser metatarsophalangeal joint         |
| N092V | Villonodular synovitis of interphalangeal joint of toe             |
| N092z | Villonodular synovitis NOS                                         |
| N093. | Palindromic rheumatism                                             |
| N0930 | Palindromic rheumatism of unspecified site                         |
| N0931 | Palindromic rheumatism of the shoulder region                      |
| N0932 | Palindromic rheumatism of the upper arm                            |
| N0933 | Palindromic rheumatism of the forearm                              |
| N0934 | Palindromic rheumatism of the hand                                 |
| N0935 | Palindromic rheumatism of the pelvic region and thigh              |
| N0936 | Palindromic rheumatism of the lower leg                            |
| N0937 | Palindromic rheumatism of the ankle and foot                       |
| N0938 | Palindromic rheumatism of other specified site                     |
| N0939 | Palindromic rheumatism of multiple sites                           |
| N093z | Palindromic rheumatism NOS                                         |
| N094. | Pain in joint - arthralgia                                         |
| N0940 | Arthralgia of unspecified site                                     |
| N0941 | Arthralgia of the shoulder region                                  |
| N0942 | Arthralgia of the upper arm                                        |
| N0943 | Arthralgia of the forearm                                          |
| N0944 | Arthralgia of the hand                                             |
| N0945 | Arthralgia of the pelvic region and thigh                          |
| N0946 | Arthralgia of the lower leg                                        |
| N0947 | Arthralgia of the ankle and foot                                   |
| N0948 | Arthralgia of other specified site                                 |
| N0949 | Arthralgia of multiple joints                                      |

|       |                                                        |
|-------|--------------------------------------------------------|
| N094A | Arthralgia of shoulder                                 |
| N094B | Arthralgia of sternoclavicular joint                   |
| N094C | Arthralgia of acromioclavicular joint                  |
| N094D | Arthralgia of elbow                                    |
| N094E | Arthralgia of distal radio-ulnar joint                 |
| N094F | Arthralgia of wrist                                    |
| N094G | Arthralgia of metacarpophalangeal joint                |
| N094H | Arthralgia of proximal interphalangeal joint of finger |
| N094J | Arthralgia of distal interphalangeal joint of finger   |
| N094K | Arthralgia of hip                                      |
| N094L | Arthralgia of sacro-iliac joint                        |
| N094M | Arthralgia of knee                                     |
| N094N | Arthralgia of tibio-fibular joint                      |
| N094P | Arthralgia of ankle                                    |
| N094Q | Arthralgia of subtalar joint                           |
| N094R | Arthralgia of talonavicular joint                      |
| N094S | Arthralgia of other tarsal joint                       |
| N094T | Arthralgia of 1st metatarsophalangeal joint            |
| N094U | Arthralgia of lesser metatarsophalangeal joint         |
| N094V | Arthralgia of interphalangeal joint of toe             |
| N094W | Anterior knee pain                                     |
| N094z | Arthralgia NOS                                         |
| N095. | Joint stiffness NEC                                    |
| N0950 | Stiff joint NEC, of unspecified site                   |
| N0951 | Stiff joint NEC, of the shoulder region                |
| N0952 | Stiff joint NEC, of the upper arm                      |
| N0953 | Stiff joint NEC, of the forearm                        |
| N0954 | Stiff joint NEC, of the hand                           |
| N0955 | Stiff joint NEC, of the pelvic region and thigh        |
| N0956 | Stiff joint NEC, of the lower leg                      |
| N0957 | Stiff joint NEC, of the ankle and foot                 |
| N0958 | Stiff joint NEC, of other specified site               |
| N0959 | Multiple stiff joints                                  |
| N095A | Stiff shoulder NEC                                     |
| N095B | Stiff sternoclavicular joint NEC                       |
| N095C | Stiff acromioclavicular joint NEC                      |
| N095D | Stiff elbow NEC                                        |
| N095E | Stiff distal radio-ulnar joint NEC                     |
| N095F | Stiff wrist NEC                                        |
| N095G | Stiff metacarpophalangeal joint NEC                    |
| N095H | Stiff proximal interphalangeal joint of finger NEC     |
| N095J | Stiff distal interphalangeal joint of finger NEC       |
| N095K | Stiff hip NEC                                          |
| N095L | Stiff sacro-iliac joint NEC                            |
| N095M | Stiff knee NEC                                         |
| N095N | Stiff tibio-fibular joint NEC                          |
| N095P | Stiff ankle NEC                                        |
| N095Q | Stiff subtalar joint NEC                               |



|       |                                                            |
|-------|------------------------------------------------------------|
| N095R | Stiff talonavicular joint NEC                              |
| N095S | Stiff other tarsal joint NEC                               |
| N095T | Stiff 1st metatarsophalangeal joint NEC                    |
| N095U | Stiff lesser metatarsophalangeal joint NEC                 |
| N095V | Stiff interphalangeal joint of toe NEC                     |
| N095W | Stiff finger                                               |
| N095z | Joint stiffness NEC, NOS                                   |
| N096. | Other joint symptoms                                       |
| N0960 | Other joint symptoms of unspecified site                   |
| N0961 | Other joint symptoms of the shoulder region                |
| N0962 | Other joint symptoms of the upper arm                      |
| N0963 | Other joint symptoms of the forearm                        |
| N0964 | Other joint symptoms of the hand                           |
| N0965 | Other joint symptoms of the pelvic region and thigh        |
| N0966 | Other joint symptoms of the lower leg                      |
| N0967 | Other joint symptoms of the ankle and foot                 |
| N0968 | Other joint symptoms of other specified site               |
| N0969 | Other joint symptoms of multiple sites                     |
| N096A | Other symptoms - shoulder                                  |
| N096B | Other symptoms in sternoclavicular joint                   |
| N096C | Other symptoms in acromioclavicular joint                  |
| N096D | Other symptoms - elbow                                     |
| N096E | Other symptoms in distal radio-ulnar joint                 |
| N096F | Other symptoms - wrist                                     |
| N096G | Other symptoms - MCPJ                                      |
| N096H | Other symptoms in proximal interphalangeal joint of finger |
| N096J | Other symptoms in distal interphalangeal joint of finger   |
| N096K | Other symptoms - hip                                       |
| N096L | Other symptoms in sacro-iliac joint                        |
| N096M | Other symptoms - knee                                      |
| N096N | Other symptoms in tibio-fibular joint                      |
| N096P | Other symptoms - ankle                                     |
| N096Q | Other symptoms in subtalar joint                           |
| N096R | Other symptoms in talonavicular joint                      |
| N096S | Other symptoms in other tarsal joint                       |
| N096T | Other symptoms in 1st metatarsophalangeal joint            |
| N096U | Other symptoms in lesser metatarsophalangeal joint         |
| N096V | Other symptoms in interphalangeal joint of toe             |
| N096z | Other joint symptoms NOS                                   |
| N097. | Difficulty in walking                                      |
| N0970 | Walking difficulty due to unspecified site                 |
| N0971 | Walking difficulty due to pelvic region and thigh          |
| N0972 | Walking difficulty due to lower leg                        |
| N0973 | Walking difficulty due to ankle and foot                   |
| N0974 | Walking difficulty due to other specified site             |
| N0975 | Walking difficulty due to multiple sites                   |
| N097z | Difficulty in walking NOS                                  |
| N098. | Synovial osteochondromatosis                               |

|       |                                                                          |
|-------|--------------------------------------------------------------------------|
| N0980 | Synovial osteochondromatosis of shoulder                                 |
| N0981 | Synovial osteochondromatosis of sternoclavicular joint                   |
| N0982 | Synovial osteochondromatosis of acromioclavicular joint                  |
| N0983 | Synovial osteochondromatosis of elbow                                    |
| N0984 | Synovial osteochondromatosis of distal radio-ulnar joint                 |
| N0985 | Synovial osteochondromatosis of wrist                                    |
| N0986 | Synovial osteochondromatosis of metacarpophalangeal joint                |
| N0987 | Synovial osteochondromatosis of proximal interphalangeal joint of finger |
| N0988 | Synovial osteochondromatosis of distal interphalangeal joint of finger   |
| N0989 | Synovial osteochondromatosis of hip                                      |
| N098A | Synovial osteochondromatosis of sacro-iliac joint                        |
| N098B | Synovial osteochondromatosis of knee                                     |
| N098C | Synovial osteochondromatosis of tibio-fibular joint                      |
| N098D | Synovial osteochondromatosis of ankle                                    |
| N098E | Synovial osteochondromatosis of subtalar joint                           |
| N098F | Synovial osteochondromatosis of talonavicular joint                      |
| N098G | Synovial osteochondromatosis of other tarsal joint                       |
| N098H | Synovial osteochondromatosis of 1st metatarsophalangeal joint            |
| N098J | Synovial osteochondromatosis of lesser metatarsophalangeal joint         |
| N098K | Synovial osteochondromatosis of interphalangeal joint of toe             |
| N099. | Clicking joint                                                           |
| N0990 | Clicking shoulder                                                        |
| N0991 | Clicking sternoclavicular joint                                          |
| N0992 | Clicking acromioclavicular joint                                         |
| N0993 | Clicking elbow                                                           |
| N0994 | Clicking distal radio-ulnar joint                                        |
| N0995 | Clicking wrist                                                           |
| N0996 | Clicking metacarpophalangeal joint                                       |
| N0997 | Clicking proximal interphalangeal joint of finger                        |
| N0998 | Clicking distal interphalangeal joint of finger                          |
| N0999 | Clicking hip                                                             |
| N099A | Multiple clicking joints                                                 |
| N099B | Clicking sacro-iliac joint                                               |
| N099C | Clicking knee                                                            |
| N099D | Clicking tibio-fibular joint                                             |
| N099E | Clicking ankle                                                           |
| N099F | Clicking subtalar joint                                                  |
| N099G | Clicking talonavicular joint                                             |
| N099H | Clicking other tarsal joint                                              |
| N099J | Clicking 1st metatarsophalangeal joint                                   |
| N099K | Clicking lesser metatarsophalangeal joint                                |
| N099L | Clicking interphalangeal joint of toe                                    |
| N09A. | Patellofemoral disorder                                                  |
| N09AX | Disorder of patella, unspecified                                         |
| N09B. | Osteophyte                                                               |
| N09C. | Fistula of joint                                                         |
| N09y. | Other specified joint disorders                                          |
| N09y0 | Other specified joint disorders of unspecified site                      |

|       |                                                                |
|-------|----------------------------------------------------------------|
| N09y1 | Other specified joint disorders of the shoulder region         |
| N09y2 | Other specified joint disorders of the upper arm               |
| N09y3 | Other specified joint disorders of the forearm                 |
| N09y4 | Other specified joint disorders of the hand                    |
| N09y5 | Other specified joint disorders of the pelvic region and thigh |
| N09y6 | Other specified joint disorders of the lower leg               |
| N09y7 | Other specified joint disorders of the ankle and foot          |
| N09y8 | Other specified joint disorders of other specified site        |
| N09y9 | Other specified joint disorders of multiple sites              |
| N09yz | Other specified joint disorders NOS                            |
| N09z. | Joint disorders NOS                                            |
| N09z0 | Joint disorder NOS, of unspecified site                        |
| N09z1 | Joint disorder NOS, of shoulder region                         |
| N09z2 | Joint disorder NOS, of the upper arm                           |
| N09z3 | Joint disorder NOS, of the forearm                             |
| N09z4 | Joint disorder NOS, of the hand                                |
| N09z5 | Joint disorder NOS, of the pelvic region and thigh             |
| N09z6 | Joint disorder NOS, of the lower leg                           |
| N09z7 | Joint disorder NOS, of ankle and foot                          |
| N09z8 | Joint disorder NOS, of other specified site                    |
| N09z9 | Joint disorder NOS, of multiple sites                          |
| N09zz | Joint disorders NOS                                            |
| N0y.. | Other specified arthropathies                                  |
| N0z.. | Arthropathies NOS                                              |
| N1... | Vertebral column syndromes                                     |
| N10.. | Inflammatory spondylopathies                                   |
| N100. | Ankylosing spondylitis                                         |
| N101. | Spinal enthesopathy                                            |
| N102. | Sacroiliitis NEC                                               |
| N10y. | Other inflammatory spondylopathies                             |
| N10y0 | Inflammatory spondylopathies in diseases EC                    |
| N10yz | Other inflammatory spondylopathies NOS                         |
| N10z. | Spondylitis NOS                                                |
| N11.. | Spondylosis and allied disorders                               |
| N110. | Cervical spondylosis without myelopathy                        |
| N1100 | Single-level cervical spondylosis without myelopathy           |
| N1101 | Two-level cervical spondylosis without myelopathy              |
| N1102 | Multiple-level cervical spondylosis without myelopathy         |
| N111. | Cervical spondylosis with myelopathy                           |
| N1110 | Single-level cervical spondylosis with myelopathy              |
| N1111 | Two-level cervical spondylosis with myelopathy                 |
| N1112 | Multiple-level cervical spondylosis with myelopathy            |
| N1113 | Cervical myelopathy                                            |
| N112. | Thoracic spondylosis without myelopathy                        |
| N1120 | Single-level thoracic spondylosis without myelopathy           |
| N1121 | Two-level thoracic spondylosis without myelopathy              |
| N1122 | Multiple-level thoracic spondylosis without myelopathy         |
| N1123 | Dorsal spondylosis without myelopathy                          |

|       |                                                           |
|-------|-----------------------------------------------------------|
| N113. | Thoracic spondylosis with myelopathy                      |
| N1130 | Single-level thoracic spondylosis with myelopathy         |
| N1131 | Two-level thoracic spondylosis with myelopathy            |
| N1132 | Multiple-level thoracic spondylosis with myelopathy       |
| N114. | Lumbosacral spondylosis without myelopathy                |
| N1140 | Single-level lumbosacral spondylosis without myelopathy   |
| N1141 | Two-level lumbosacral spondylosis without myelopathy      |
| N1142 | Multiple-level lumbosacral spondylosis without myelopathy |
| N115. | Lumbosacral spondylosis with myelopathy                   |
| N1150 | Single-level lumbosacral spondylosis with myelopathy      |
| N1151 | Two-level lumbosacral spondylosis with myelopathy         |
| N1152 | Multiple-level lumbosacral spondylosis with myelopathy    |
| N116. | Kissing spine                                             |
| N117. | Ankylosing vertebral hyperostosis                         |
| N118. | Traumatic spondylopathy                                   |
| N119. | Cervical spondylosis with radiculopathy                   |
| N1190 | Single-level cervical spondylosis with radiculopathy      |
| N1191 | Two-level cervical spondylosis with radiculopathy         |
| N1192 | Multiple-level cervical spondylosis with radiculopathy    |
| N11A. | Cervical spondylosis with vascular compression            |
| N11B. | Thoracic spondylosis with radiculopathy                   |
| N11B0 | Single-level thoracic spondylosis with radiculopathy      |
| N11B1 | Two-level thoracic spondylosis with radiculopathy         |
| N11B2 | Multiple-level thoracic spondylosis with radiculopathy    |
| N11C. | Lumbosacral spondylosis with radiculopathy                |
| N11C0 | Single-level lumbosacral spondylosis with radiculopathy   |
| N11C1 | Two-level lumbosacral spondylosis with radiculopathy      |
| N11C2 | Multiple-level lumbosacral spondylosis with radiculopathy |
| N11D. | Osteoarthritis of spine                                   |
| N11D0 | Osteoarthritis of cervical spine                          |
| N11D1 | Osteoarthritis of thoracic spine                          |
| N11D2 | Osteoarthritis of lumbar spine                            |
| N11D3 | Osteoarthritis of spine NOS                               |
| N11E. | Cervical spondylosis                                      |
| N11F. | Axial spondyloarthritis                                   |
| N11y. | Other spondyloses and allied disorders                    |
| N11y0 | Brucella spondylitis                                      |
| N11y1 | Enterobacterial spondylitis                               |
| N11y2 | Neuropathic spondylopathy                                 |
| N11z. | Spondylosis NOS                                           |
| N11z0 | Spondylosis without myelopathy, NOS                       |
| N11z1 | Spondylosis with myelopathy, NOS                          |
| N11zz | Spondylosis NOS                                           |
| N12.. | Intervertebral disc disorders                             |
| N120. | Cervical disc displacement without myelopathy             |
| N121. | Thoracic disc displacement without myelopathy             |
| N122. | Lumbar disc displacement                                  |
| N123. | Disc displacement, site unspecified, without myelopathy   |

|       |                                                    |
|-------|----------------------------------------------------|
| N124. | Schmorl's nodes                                    |
| N1240 | Schmorl's nodes of unspecified region              |
| N1241 | Schmorl's nodes of the thoracic region             |
| N1242 | Schmorl's nodes of the lumbar region               |
| N124z | Schmorl's nodes, region NOS                        |
| N125. | Cervical disc degeneration                         |
| N126. | Thoracic disc degeneration                         |
| N127. | Lumbar disc degeneration                           |
| N128. | Degenerative disc disease NOS                      |
| N129. | Disc disorder with myelopathy                      |
| N1290 | Unspecified disc disorder with myelopathy          |
| N1291 | Cervical disc disorder with myelopathy             |
| N1292 | Thoracic disc disorder with myelopathy             |
| N1293 | Lumbar disc disorder with myelopathy               |
| N129z | Disc disorder with myelopathy NOS                  |
| N12A. | Postlaminectomy syndrome                           |
| N12A0 | Postlaminectomy syndrome of unspecified site       |
| N12A1 | Cervical postlaminectomy syndrome                  |
| N12A2 | Thoracic postlaminectomy syndrome                  |
| N12A3 | Lumbar postlaminectomy syndrome                    |
| N12Az | Postlaminectomy syndrome NOS                       |
| N12B. | Disc prolapse with myelopathy                      |
| N12B0 | Cervical disc prolapse with myelopathy             |
| N12B1 | Thoracic disc prolapse with myelopathy             |
| N12B2 | Lumbar disc prolapse with myelopathy               |
| N12C. | Disc prolapse with radiculopathy                   |
| N12C0 | Cervical disc prolapse with radiculopathy          |
| N12C1 | Thoracic disc prolapse with radiculopathy          |
| N12C2 | Lumbar disc prolapse with radiculopathy            |
| N12C3 | Lumbar disc prolapse with cauda equina compression |
| N12C4 | Prolapsed lumbar intervertebral disc with sciatica |
| N12D. | Narrowing intervertebral disc space                |
| N12z. | Other and unspecified disc disorders               |
| N12z0 | Other disc disorders of unspecified site           |
| N12z1 | Other cervical disc disorders                      |
| N12z2 | Other thoracic disc disorders                      |
| N12z3 | Other lumbar disc disorders                        |
| N12z4 | Cervical discitis                                  |
| N12z5 | Annular tear of cervical disc                      |
| N12z6 | Resorption of cervical disc                        |
| N12z7 | Calcification of cervical disc                     |
| N12z8 | Thoracic discitis                                  |
| N12z9 | Annular tear of thoracic disc                      |
| N12zA | Resorption of thoracic disc                        |
| N12zB | Calcification of thoracic disc                     |
| N12zC | Lumbar discitis                                    |
| N12zD | Annular tear of lumbar disc                        |
| N12zE | Resorption of lumbar disc                          |

|       |                                                       |
|-------|-------------------------------------------------------|
| N12zF | Calcification of lumbar disc                          |
| N12zG | Infection of intervertebral disc - pyogenic           |
| N12zH | Cervical disc disorder with radiculopathy             |
| N12zz | Disc disorders NOS                                    |
| N13.. | Other cervical disorders                              |
| N130. | Cervical spinal stenosis                              |
| N1300 | Idiopathic cervical spinal stenosis                   |
| N1301 | Degenerative cervical spinal stenosis                 |
| N1302 | Iatrogenic cervical spinal stenosis                   |
| N1303 | Cervical spinal stenosis secondary to other disease   |
| N131. | Cervicalgia - pain in neck                            |
| N132. | Cervicocranial syndrome                               |
| N133. | Cervicobrachial syndrome                              |
| N134. | Brachial (cervical) neuritis                          |
| N135. | Torticollis unspecified                               |
| N1350 | Intermittent torticollis                              |
| N1351 | Rheumatic torticollis                                 |
| N135z | Torticollis NOS                                       |
| N136. | Panniculitis of neck                                  |
| N137. | Cervical posterior longitudinal ligament ossification |
| N138. | Cervicalgia                                           |
| N13y. | Other cervical syndromes                              |
| N13y0 | Cervical syndrome NEC                                 |
| N13y1 | Klippel's disease                                     |
| N13y2 | Crick in neck                                         |
| N13y3 | Cervical root syndrome                                |
| N13yz | Other cervical syndromes NOS                          |
| N13z. | Cervical and neck disorders NOS                       |
| N14.. | Other and unspecified back disorders                  |
| N140. | Spinal stenosis, excluding cervical region            |
| N1400 | Spinal stenosis of unspecified region                 |
| N1401 | Thoracic spinal stenosis                              |
| N1402 | Lumbar spinal stenosis                                |
| N1403 | Idiopathic thoracic spinal stenosis                   |
| N1404 | Degenerative thoracic spinal stenosis                 |
| N1405 | Iatrogenic thoracic spinal stenosis                   |
| N1406 | Thoracic spinal stenosis secondary to other disease   |
| N1407 | Idiopathic lumbar spinal stenosis                     |
| N1408 | Degenerative lumbar spinal stenosis                   |
| N1409 | Iatrogenic lumbar spinal stenosis                     |
| N140A | Lumbar spinal stenosis secondary to other disease     |
| N140z | Spinal stenosis NOS                                   |
| N141. | Pain in thoracic spine                                |
| N142. | Pain in lumbar spine                                  |
| N1420 | Lumbago with sciatica                                 |
| N143. | Sciatica                                              |
| N144. | Thoracic and lumbosacral neuritis                     |
| N1440 | Thoracic neuritis, unspecified                        |

|       |                                                                |
|-------|----------------------------------------------------------------|
| N1441 | Lumbosacral neuritis, unspecified                              |
| N144z | Thoracic and lumbosacral neuritis NOS                          |
| N145. | Backache, unspecified                                          |
| N146. | Disorders of the sacrum                                        |
| N1460 | Lumbosacral ankylosis                                          |
| N1461 | Sacroiliac ankylosis                                           |
| N1462 | Sacral ankylosis NOS                                           |
| N1463 | Lumbosacral instability                                        |
| N1464 | Sacroiliac instability                                         |
| N1465 | Sacral instability NOS                                         |
| N1466 | Sacroiliac disorder                                            |
| N146z | Disorders of the sacrum NOS                                    |
| N147. | Disorders of the coccyx                                        |
| N1470 | Unspecified disorder of the coccyx                             |
| N1471 | Hypermobility of the coccyx                                    |
| N1472 | Coccygodynia                                                   |
| N147z | Coccyx disorder NOS                                            |
| N148. | Ankylosis or instability of cervical, thoracic or lumbar spine |
| N1480 | Atlanto-occipital ankylosis                                    |
| N1481 | Atlanto-axial ankylosis                                        |
| N1482 | Cervical spine ankylosis                                       |
| N1483 | Cervico-thoracic ankylosis                                     |
| N1484 | Thoracic spine ankylosis                                       |
| N1485 | Thoraco-lumbar ankylosis                                       |
| N1486 | Lumbar spine ankylosis                                         |
| N1487 | Atlanto-occipital instability                                  |
| N1488 | Atlanto-axial instability                                      |
| N1489 | Cervical spine instability                                     |
| N148A | Cervico-thoracic instability                                   |
| N148B | Thoracic spine instability                                     |
| N148C | Lumbar spine instability                                       |
| N149. | Back stiffness                                                 |
| N14A. | Neurogenic claudication                                        |
| N14X. | Sacrococcygeal disorders, not elsewhere classified             |
| N14y. | Other back symptoms                                            |
| N14z. | Back disorders NOS                                             |
| N1y.. | Other specified disorders of vertebral column                  |
| N1y0. | Recurrent atlantoaxial subluxation with myelopathy             |
| N1y1. | Fatigue fracture of vertebra                                   |
| N1y2. | Pars interarticularis stress fracture                          |
| N1z.. | Vertebral column disorder NOS                                  |
| N2... | Rheumatism, excluding the back                                 |
| N20.. | Polymyalgia rheumatica                                         |
| N200. | Giant cell arteritis with polymyalgia rheumatica               |
| N21.. | Peripheral enthesopathies and allied syndromes                 |
| N210. | Adhesive capsulitis of the shoulder                            |
| N211. | Rotator cuff shoulder syndrome and allied disorders            |
| N2110 | Rotator cuff syndrome, unspecified                             |

|       |                                       |
|-------|---------------------------------------|
| N2111 | Calcifying tendinitis of the shoulder |
| N2112 | Bicipital tenosynovitis               |
| N2113 | Supraspinatus tendinitis              |
| N2114 | Partial thickness rotator cuff tear   |
| N2115 | Full thickness rotator cuff tear      |
| N2116 | Subacromial bursitis                  |
| N2117 | Subdeltoid bursitis                   |
| N2118 | Bursitis of shoulder                  |
| N211z | Rotator cuff syndrome NOS             |
| N212. | Other shoulder affections NEC         |
| N2120 | Periarthritis of shoulder             |
| N2121 | Scapulohumeral fibrositis             |
| N2122 | Subacromial impingement               |
| N2123 | Coracoid impingement                  |
| N2124 | Impingement syndrome of shoulder      |
| N2125 | Shoulder tendonitis                   |
| N212z | Other shoulder affections NEC, NOS    |
| N213. | Enthesopathy of the elbow region      |
| N2130 | Elbow enthesopathy unspecified        |
| N2131 | Medial epicondylitis of the elbow     |
| N2132 | Lateral epicondylitis of the elbow    |
| N2133 | Olecranon bursitis                    |
| N2134 | Biceps tendinitis                     |
| N2135 | Triceps tendinitis                    |
| N213z | Elbow enthesopathy NOS                |
| N214. | Enthesopathy of the wrist and carpus  |
| N2140 | Bursitis of wrist                     |
| N2141 | Bursitis of hand                      |
| N2142 | Periarthritis of wrist                |
| N2143 | Carpometacarpal bossing               |
| N214z | Wrist or carpus enthesopathy NOS      |
| N215. | Enthesopathy of the hip region        |
| N2150 | Hip enthesopathy, unspecified         |
| N2151 | Bursitis of hip                       |
| N2152 | Gluteal tendinitis                    |
| N2153 | Iliac crest spur                      |
| N2154 | Psoas tendinitis                      |
| N2155 | Trochanteric tendinitis               |
| N2156 | Adductor tendinitis                   |
| N2157 | Trochanteric bursitis                 |
| N2158 | Snapping hip                          |
| N2159 | Iliotibial band syndrome              |
| N215A | Ischial bursitis                      |
| N215B | Femoroacetabular impingement          |
| N215z | Hip enthesopathy NOS                  |
| N216. | Enthesopathy of the knee              |
| N2160 | Bursitis of the knee NOS              |
| N2161 | Pes anserinus tendinitis and bursitis |



|       |                                                   |
|-------|---------------------------------------------------|
| N2162 | Tibial collateral ligament bursitis               |
| N2163 | Fibular collateral ligament bursitis              |
| N2164 | Patellar tendinitis                               |
| N2165 | Prepatellar bursitis                              |
| N2166 | Infrapatellar bursitis                            |
| N2167 | Subpatellar bursitis                              |
| N2168 | Biceps femoris tendinitis                         |
| N2169 | Semimembranosus tendinitis                        |
| N216z | Knee enthesopathy NOS                             |
| N217. | Enthesopathy of the ankle and tarsus              |
| N2170 | Enthesopathy of the ankle unspecified             |
| N2171 | Enthesopathy of the tarsus unspecified            |
| N2172 | Metatarsalgia NOS                                 |
| N2173 | Achilles bursitis                                 |
| N2174 | Achilles tendinitis                               |
| N2175 | Tibialis anterior tendinitis                      |
| N2176 | Tibialis posterior tendinitis                     |
| N2177 | Calcaneal spur                                    |
| N2178 | Peroneal tendinitis                               |
| N2179 | Plantar fasciitis                                 |
| N217A | Posterior calcaneal exostosis (pump bump)         |
| N217B | Anterior ankle impingement                        |
| N217C | Fibular impingement                               |
| N217z | Ankle or tarsus enthesopathy NOS                  |
| N21y. | Other peripheral enthesopathies                   |
| N21y0 | Anterior shin splints                             |
| N21y1 | Posterior shin splints                            |
| N21z. | Enthesopathy NOS                                  |
| N21z0 | Capsulitis NOS                                    |
| N21z1 | Periarthritis NOS                                 |
| N21z2 | Tendinitis NOS                                    |
| N21z3 | Exostosis of unspecified site                     |
| N21z4 | Subungual exostosis                               |
| N21z5 | Subungual exostosis of great toe                  |
| N21z6 | Subungual exostosis of lesser toe                 |
| N21z7 | Exostosis                                         |
| N21zz | Peripheral enthesopathy NOS                       |
| N22.. | Other disorders of the synovium, tendon and bursa |
| N220. | Synovitis and tenosynovitis                       |
| N2200 | Synovitis or tenosynovitis NOS                    |
| N2201 | Synovitis and tenosynovitis with disorders EC     |
| N2202 | Tendon sheath giant cell tumor                    |
| N2203 | Trigger finger - acquired                         |
| N2204 | Radial styloid tenosynovitis                      |
| N2205 | Other tenosynovitis of hand or wrist              |
| N2206 | Tenosynovitis of ankle                            |
| N2207 | Tenosynovitis of foot                             |
| N2208 | Villonodular synovitis of tendon sheath           |

|       |                                                 |
|-------|-------------------------------------------------|
| N2209 | Plant thorn synovitis                           |
| N220A | Flexor tenosynovitis of wrist                   |
| N220B | Flexor tenosynovitis of finger                  |
| N220C | Flexor tenosynovitis of thumb                   |
| N220D | Extensor tenosynovitis of wrist                 |
| N220E | Extensor tenosynovitis of finger                |
| N220F | Extensor tenosynovitis of thumb                 |
| N220G | Acquired trigger thumb                          |
| N220H | Achilles tenosynovitis                          |
| N220J | Tibialis anterior tenosynovitis                 |
| N220K | Tibialis posterior tenosynovitis                |
| N220L | Extensor hallucis longus tenosynovitis          |
| N220M | Extensor digitorum longus tenosynovitis         |
| N220N | Peroneus longus tenosynovitis                   |
| N220P | Peroneus brevis tenosynovitis                   |
| N220Q | Transient synovitis                             |
| N220R | Chronic crepitant synovitis of hand and wrist   |
| N220S | Synovitis of hip                                |
| N220T | Synovitis NOS                                   |
| N220V | Synovitis of knee                               |
| N220W | Synovitis of elbow                              |
| N220X | Synovitis of shoulder                           |
| N220Y | Irritable hip                                   |
| N220z | Other synovitis and tenosynovitis               |
| N221. | Bunion                                          |
| N2210 | Infected bunion                                 |
| N222. | Specific bursitides                             |
| N2220 | Beat elbow                                      |
| N2221 | Beat hand                                       |
| N2222 | Beat knee                                       |
| N2223 | Miners' elbow                                   |
| N2224 | Miners' knee                                    |
| N2225 | Housemaids' knee                                |
| N2226 | Calcium deposit in bursa                        |
| N2227 | Syphilitic bursitis                             |
| N222z | Specific bursitides NOS                         |
| N223. | Bursitis NOS                                    |
| N224. | Ganglion and cyst of synovium, tendon and bursa |
| N2240 | Synovial cyst unspecified                       |
| N2241 | Ganglion of joint                               |
| N2242 | Ganglion of tendon sheath                       |
| N2243 | Ganglion unspecified                            |
| N2244 | Cyst of bursa                                   |
| N2245 | Ganglion of wrist                               |
| N2246 | Ganglion of knee                                |
| N2247 | Ganglion of superior tibio-fibular joint        |
| N2248 | Ganglion of ankle                               |
| N2249 | Ganglion of flexor tendon sheath of finger      |

|       |                                               |
|-------|-----------------------------------------------|
| N224A | Synovial cyst of popliteal space              |
| N224B | Ganglion of hand                              |
| N224C | Ganglion of foot                              |
| N224D | Cyst of tendon sheath                         |
| N224E | Digital mucous cyst                           |
| N224z | Ganglion or cyst of synovium/tendon/bursa NOS |
| N225. | Rupture of synovium                           |
| N2250 | Rupture of synovium, unspecified              |
| N2251 | Rupture of popliteal space synovial cyst      |
| N225z | Rupture of synovium NOS                       |
| N226. | Nontraumatic tendon rupture                   |
| N2260 | Nontraumatic tendon rupture, unspecified      |
| N2261 | Rotator cuff complete rupture                 |
| N2262 | Biceps tendon rupture                         |
| N2263 | Hand and wrist extensor tendon rupture        |
| N2264 | Hand and wrist flexor tendon rupture          |
| N2265 | Quadriceps tendon rupture                     |
| N2266 | Nontraumatic rupture of patellar tendon       |
| N2267 | Nontraumatic rupture of Achilles tendon       |
| N2268 | Extensor digitorum communis rupture           |
| N2269 | Extensor pollicis longus rupture              |
| N226A | Long head of biceps rupture                   |
| N226B | Subluxation of long head of biceps            |
| N226C | Flexor digitorum sublimis tendon rupture      |
| N226D | Flexor digitorum profundus tendon rupture     |
| N226E | Flexor pollicis longus tendon rupture         |
| N226F | Tibialis posterior rupture                    |
| N226G | Peroneus longus rupture                       |
| N226H | Subluxation of peroneal tendon                |
| N226J | Subluxation of tendon, wrist or hand          |
| N226K | Dislocation of tendon, wrist or hand          |
| N226L | Bowstringing of tendon, wrist or hand         |
| N226M | Spontaneous rupture of flexor tendons         |
| N226N | Spontaneous rupture of extensor tendons       |
| N226y | Other foot and ankle tendon rupture           |
| N226z | Other nontraumatic tendon rupture             |
| N227. | Posterior tibial tendon insufficiency         |
| N228. | Tendinous xanthoma                            |
| N22y. | Other synovial, tendon and bursa disorders    |
| N22y0 | Contracture of tendon sheath                  |
| N22y1 | Calcification of tendon NOS                   |
| N22y2 | Abscess of tendon                             |
| N22y3 | Abscess of bursa                              |
| N22y4 | Synovial plica                                |
| N22y5 | Short tendon                                  |
| N22y6 | Abscess of tendon-arm                         |
| N22y7 | Abscess of tendon-forearm                     |
| N22y8 | Abscess of tendon-hand                        |

|       |                                                                 |
|-------|-----------------------------------------------------------------|
| N22y9 | Abscess of tendon-thigh                                         |
| N22yA | Abscess of tendon-leg                                           |
| N22yB | Abscess of tendon-foot                                          |
| N22yC | Pyogenic infection of tendon sheath                             |
| N22yD | Tuberculous infection of tendon sheath                          |
| N22yE | Abscess of bursa-shoulder                                       |
| N22yF | Abscess of bursa-elbow                                          |
| N22yG | Abscess of bursa-wrist                                          |
| N22yH | Abscess of bursa-hip                                            |
| N22yJ | Abscess of bursa-knee                                           |
| N22yK | Abscess of bursa-ankle                                          |
| N22yL | Abscess of bursa-foot                                           |
| N22yM | Short Achilles tendon - acquired                                |
| N22yN | Achilles degeneration                                           |
| N22yz | Other synovial, tendon or bursa disorder NOS                    |
| N22z. | Synovial, tendon or bursa disorder NOS                          |
| N23.. | Muscle, ligament and fascia disorders                           |
| N230. | Infective myositis                                              |
| N2300 | Infective myositis-neck                                         |
| N2301 | Infective myositis-back                                         |
| N2302 | Infective myositis-shoulder                                     |
| N2303 | Infective myositis-arm                                          |
| N2304 | Infective myositis-forearm                                      |
| N2305 | Infective myositis-hand                                         |
| N2306 | Infective myositis-pelvis                                       |
| N2307 | Infective myositis-thigh                                        |
| N2308 | Infective myositis-leg                                          |
| N2309 | Infective myositis-foot                                         |
| N230A | Muscle abscess                                                  |
| N230B | Muscle abscess-neck                                             |
| N230C | Muscle abscess-back                                             |
| N230D | Muscle abscess-shoulder                                         |
| N230E | Muscle abscess-arm                                              |
| N230F | Muscle abscess-forearm                                          |
| N230G | Muscle abscess-hand                                             |
| N230H | Muscle abscess-pelvis                                           |
| N230J | Muscle abscess-thigh                                            |
| N230K | Muscle abscess-leg                                              |
| N230L | Muscle abscess-foot                                             |
| N231. | Muscle calcification and ossification                           |
| N2310 | Muscular calcification and ossification, unspecified            |
| N2311 | Progressive myositis ossificans                                 |
| N2312 | Traumatic myositis ossificans                                   |
| N2313 | Post-operative heterotopic calcification                        |
| N2314 | Polymyositis ossificans                                         |
| N2315 | Calcification and ossification of muscles associated with burns |
| N2316 | Paralytic calcification and ossification of muscle              |
| N231z | Muscle calcification or ossification NOS                        |

|       |                                                                        |
|-------|------------------------------------------------------------------------|
| N232. | Muscle wasting and disuse atrophy NEC                                  |
| N2320 | Amyotrophia NOS                                                        |
| N2321 | Myofibrosis                                                            |
| N2322 | Muscle wasting NEC                                                     |
| N232z | Muscle wasting/disuse atrophy NEC NOS                                  |
| N233. | Other specific muscle disorder                                         |
| N2330 | Arthrogryposis                                                         |
| N2331 | Immobility syndrome                                                    |
| N2332 | Myositis in sarcoidosis                                                |
| N2333 | Rhabdomyolysis                                                         |
| N2334 | Antisynthetase syndrome                                                |
| N233z | Other specific muscle disorder NOS                                     |
| N234. | Laxity of ligament                                                     |
| N235. | Hypermobility syndrome                                                 |
| N236. | Dupuytren's contracture                                                |
| N2360 | Dupuytren's disease of palm                                            |
| N2361 | Dupuytren's disease of palm, nodules with no contracture               |
| N2362 | Dupuytren's disease of palm, with contracture                          |
| N2363 | Dupuytren's disease of finger(s)                                       |
| N2364 | Dupuytren's disease of finger(s), nodules with no contracture          |
| N2365 | Dupuytren's disease of finger(s), with contracture                     |
| N2366 | Dupuytren's disease of palm and finger(s)                              |
| N2367 | Dupuytren's disease of palm and finger(s), nodules with no contracture |
| N2368 | Dupuytren's disease of palm and finger(s), with contracture            |
| N237. | Other fibromatoses                                                     |
| N2370 | Plantar fascial fibromatosis                                           |
| N2371 | Knuckle pads                                                           |
| N2372 | Nodular fasciitis                                                      |
| N2373 | Pseudosarcomatous fibromatosis                                         |
| N237z | Other fibromatoses NOS                                                 |
| N238. | Muscle contracture                                                     |
| N2380 | Contracture of pectoralis major                                        |
| N2381 | Contracture of triceps                                                 |
| N2382 | Contracture of biceps                                                  |
| N2383 | Contracture of wrist flexor(s)                                         |
| N2384 | Contracture of wrist extensor(s)                                       |
| N2385 | Contracture of flexor pollicis longus                                  |
| N2386 | Contracture of thumb extensor(s)                                       |
| N2387 | Contracture of flexor digitorum superficialis                          |
| N2388 | Contracture of flexor digitorum profundus                              |
| N2389 | Contracture of adductor pollicis                                       |
| N238A | Contracture of other intrinsic muscle(s) of hand                       |
| N238B | Contracture of iliopsoas                                               |
| N238C | Contracture of rectus femoris                                          |
| N238D | Contracture of adductor muscle(s) of hip                               |
| N238E | Contracture of abductor muscle(s) of hip                               |
| N238F | Contracture of hamstring(s)                                            |
| N238G | Contracture of quadriceps                                              |

|       |                                                 |
|-------|-------------------------------------------------|
| N238H | Contracture of tendo achilles                   |
| N238J | Contracture of tibialis anterior                |
| N238K | Contracture of tibialis posterior               |
| N238L | Contracture of long toe flexor(s)               |
| N238M | Contracture of long toe extensor(s)             |
| N238N | Contracture of intrinsic muscle(s) of foot      |
| N239. | Fibromyalgia                                    |
| N23y. | Other muscle, ligament and fascia disorder      |
| N23y0 | Interstitial myositis                           |
| N23y1 | Foreign body muscle granuloma                   |
| N23y2 | Nontraumatic muscle rupture                     |
| N23y3 | Diastasis recti abdominis                       |
| N23y4 | Spasm of muscle                                 |
| N23y5 | Inappropriate firing of muscle                  |
| N23y6 | Palmar space infection, thenar                  |
| N23y7 | Palmar space infection, mid-palm                |
| N23y8 | Palmar space infection, hypo-thenar             |
| N23y9 | Calcific tendinitis                             |
| N23yA | Diastasis of muscle                             |
| N23yB | Ischaemic infarction of muscle                  |
| N23yC | Contracture of muscle                           |
| N23yD | Muscle strain                                   |
| N23yE | Spasm of back muscles                           |
| N23yF | Muscle crush syndrome                           |
| N23yz | Other muscle, ligament or fascia disorder NOS   |
| N23z. | Muscle, ligament or fascia disorder NOS         |
| N24.. | Other soft tissue disorders                     |
| N240. | Rheumatism and fibrositis unspecified           |
| N2400 | Rheumatism unspecified                          |
| N2401 | Fibrositis unspecified                          |
| N2402 | Muscular rheumatism                             |
| N2403 | Rheumatic pain                                  |
| N2405 | Fibrositis of neck                              |
| N2406 | Fibrositis arm                                  |
| N2407 | Hand rheumatism                                 |
| N240z | Rheumatism or fibrositis NOS                    |
| N241. | Myalgia and myositis unspecified                |
| N2410 | Myalgia unspecified                             |
| N2411 | Myositis unspecified                            |
| N2412 | Fibromyositis NOS                               |
| N2413 | Viral myalgia                                   |
| N241z | Myalgia or myositis NOS                         |
| N242. | Neuralgia, neuritis and radiculitis unspecified |
| N2420 | Neuralgia unspecified                           |
| N2421 | Neuritis unspecified                            |
| N2422 | Radiculitis unspecified                         |
| N2423 | Neuropathic pain                                |
| N242z | Neuralgia, neuritis or radiculitis NOS          |

|       |                                                                       |
|-------|-----------------------------------------------------------------------|
| N243. | Panniculitis unspecified                                              |
| N2430 | Panniculitis of unspecified site                                      |
| N2431 | Hypertrophy of the knee fat pad                                       |
| N2432 | Weber - Christian disease                                             |
| N243z | Panniculitis NOS                                                      |
| N244. | Fasciitis unspecified                                                 |
| N245. | Pain in limb                                                          |
| N2450 | Hand pain                                                             |
| N2451 | Foot pain                                                             |
| N2452 | Pain in leg                                                           |
| N2453 | Pain in arm                                                           |
| N2454 | Calf pain                                                             |
| N2455 | Axillary pain                                                         |
| N2456 | Tender heel pad                                                       |
| N2457 | Shoulder pain                                                         |
| N246. | Residual foreign body in soft tissue                                  |
| N247. | Other musculoskeletal limb symptoms                                   |
| N2470 | Swelling of limb                                                      |
| N2471 | Leg cramps                                                            |
| N2472 | Cramp                                                                 |
| N247z | Musculoskeletal limb symptoms NOS                                     |
| N248. | Fibromyalgia                                                          |
| N2480 | Myofascial pain syndrome                                              |
| N2481 | Piriformis syndrome                                                   |
| N24z. | Soft tissue disorders NOS                                             |
| N25.. | SAPHO syndrome (Synovitis Acne Pustulosis Hyperostosis Osteomyelitis) |
| N2y.. | Other specified nonarticular rheumatism                               |
| N2z.. | Nonarticular rheumatism NOS                                           |
| N3... | Osteopathies, chondropathies and acquired musculoskeletal deformities |
| N30.. | Osteomyelitis, periostitis and other infections affecting bone        |
| N300. | Acute osteomyelitis                                                   |
| N3000 | Acute osteomyelitis of unspecified site                               |
| N3001 | Acute osteomyelitis of the shoulder region                            |
| N3002 | Acute osteomyelitis of the upper arm                                  |
| N3003 | Acute osteomyelitis of the forearm                                    |
| N3004 | Acute osteomyelitis of the hand                                       |
| N3005 | Acute osteomyelitis of the pelvic region and thigh                    |
| N3006 | Acute osteomyelitis of the lower leg                                  |
| N3007 | Acute osteomyelitis of the ankle and foot                             |
| N3008 | Acute osteomyelitis of other specified site                           |
| N3009 | Acute osteomyelitis of multiple sites                                 |
| N300A | Acute osteomyelitis-cervical spine                                    |
| N300B | Acute osteomyelitis-thoracic spine                                    |
| N300C | Acute osteomyelitis-lumbar spine                                      |
| N300D | Acute osteomyelitis-sacrum                                            |
| N300E | Acute osteomyelitis-coccyx                                            |
| N300F | Acute osteomyelitis-clavicle                                          |
| N300G | Acute osteomyelitis-scapula                                           |

|       |                                                      |
|-------|------------------------------------------------------|
| N300H | Acute osteomyelitis-humerus                          |
| N300J | Acute osteomyelitis-radius                           |
| N300K | Acute osteomyelitis-ulna                             |
| N300L | Acute osteomyelitis-carpal bone                      |
| N300M | Acute osteomyelitis-metacarpal                       |
| N300N | Acute osteomyelitis-phalanx of finger/thumb          |
| N300P | Acute osteomyelitis-pelvis                           |
| N300Q | Acute osteomyelitis-femur                            |
| N300R | Acute osteomyelitis-patella                          |
| N300S | Acute osteomyelitis-tibia                            |
| N300T | Acute osteomyelitis-fibula                           |
| N300U | Acute osteomyelitis-calcaneum                        |
| N300V | Acute osteomyelitis-talus                            |
| N300W | Acute osteomyelitis-other tarsal bone                |
| N300X | Acute osteomyelitis-metatarsal                       |
| N300Y | Acute osteomyelitis-phalanx of toe                   |
| N300Z | Acute haematogenous osteomyelitis                    |
| N300z | Acute osteomyelitis NOS                              |
| N301. | Chronic osteomyelitis                                |
| N3010 | Chronic osteomyelitis of unspecified site            |
| N3011 | Chronic osteomyelitis of the shoulder region         |
| N3012 | Chronic osteomyelitis of the upper arm               |
| N3013 | Chronic osteomyelitis of the forearm                 |
| N3014 | Chronic osteomyelitis of the hand                    |
| N3015 | Chronic osteomyelitis of the pelvic region and thigh |
| N3016 | Chronic osteomyelitis of the lower leg               |
| N3017 | Chronic osteomyelitis of the ankle and foot          |
| N3018 | Chronic osteomyelitis of other specified site        |
| N3019 | Chronic osteomyelitis of multiple sites              |
| N301A | Chronic osteomyelitis-cervical spine                 |
| N301B | Chronic osteomyelitis-thoracic spine                 |
| N301C | Chronic osteomyelitis-lumbar spine                   |
| N301D | Chronic osteomyelitis-sacrum                         |
| N301E | Chronic osteomyelitis-coccyx                         |
| N301F | Brodie's abscess-cervical spine                      |
| N301G | Brodie's abscess-thoracic spine                      |
| N301H | Brodie's abscess-lumbar spine                        |
| N301J | Brodie's abscess-sacrum                              |
| N301K | Brodie's abscess-coccyx                              |
| N301L | Chronic multifocal osteomyelitis                     |
| N301M | Chronic osteomyelitis with draining sinus            |
| N301z | Chronic osteomyelitis NOS                            |
| N302. | Unspecified osteomyelitis                            |
| N3020 | Unspecified osteomyelitis of unspecified site        |
| N3021 | Unspecified osteomyelitis of the shoulder region     |
| N3022 | Unspecified osteomyelitis of the upper arm           |
| N3023 | Unspecified osteomyelitis of the forearm             |
| N3024 | Unspecified osteomyelitis of the hand                |



|       |                                                                       |
|-------|-----------------------------------------------------------------------|
| N3025 | Unspecified osteomyelitis of the pelvic region and thigh              |
| N3026 | Unspecified osteomyelitis of the lower leg                            |
| N3027 | Unspecified osteomyelitis of the ankle and foot                       |
| N3028 | Unspecified osteomyelitis of other specified site                     |
| N3029 | Unspecified osteomyelitis of multiple sites                           |
| N302A | Infection of cervical spine                                           |
| N302B | Infection of thoracic spine                                           |
| N302C | Infection of lumbar spine                                             |
| N302D | Infection of sacrum                                                   |
| N302E | Infection of coccyx                                                   |
| N302F | Infection of clavicle                                                 |
| N302G | Infection of scapula                                                  |
| N302H | Infection of humerus                                                  |
| N302J | Infection of radius                                                   |
| N302K | Infection of ulna                                                     |
| N302L | Infection of carpal bone                                              |
| N302M | Infection of metacarpal                                               |
| N302N | Infection of phalanx of finger or thumb                               |
| N302P | Infection of pelvis                                                   |
| N302Q | Infection of femur                                                    |
| N302R | Infection of patella                                                  |
| N302S | Infection of tibia                                                    |
| N302T | Infection of fibula                                                   |
| N302U | Infection of calcaneum                                                |
| N302V | Infection of talus                                                    |
| N302W | Infection of other tarsal bone                                        |
| N302X | Infection of metatarsal                                               |
| N302Y | Infection of phalanx of toe                                           |
| N302Z | Infection of multiple bones                                           |
| N302a | Osteomyelitis of vertebra                                             |
| N302b | Brodie's abscess                                                      |
| N302z | Unspecified osteomyelitis NOS                                         |
| N303. | Periostitis without osteomyelitis                                     |
| N3030 | Periostitis without mention of osteomyelitis, of unspecified site     |
| N3031 | Periostitis without mention of osteomyelitis, of the shoulder region  |
| N3032 | Periostitis without mention of osteomyelitis, of the upper arm        |
| N3033 | Periostitis without osteomyelitis, of the forearm                     |
| N3034 | Periostitis without osteomyelitis, of the hand                        |
| N3035 | Periostitis without osteomyelitis, of the pelvic region and thigh     |
| N3036 | Periostitis without mention of osteomyelitis, of the lower leg        |
| N3037 | Periostitis without mention of osteomyelitis, of the ankle and foot   |
| N3038 | Periostitis without mention of osteomyelitis, of other specified site |
| N3039 | Periostitis without mention of osteomyelitis, of multiple sites       |
| N303A | Periostitis without osteomyelitis-cervical spine                      |
| N303B | Periostitis without osteomyelitis-thoracic spine                      |
| N303C | Periostitis without osteomyelitis-lumbar spine                        |
| N303D | Periostitis without osteomyelitis-sacrum                              |
| N303E | Periostitis without osteomyelitis-coccyx                              |

|       |                                                         |
|-------|---------------------------------------------------------|
| N303z | Periostitis without osteomyelitis NOS                   |
| N304. | Tuberculosis of spine (Pott's)                          |
| N3040 | Tuberculosis of cervical spine                          |
| N3041 | Tuberculosis of thoracic spine                          |
| N3042 | Tuberculosis of lumbar spine                            |
| N3043 | Tuberculosis of sacrum/coccyx                           |
| N305. | Tuberculosis of limb bones                              |
| N3050 | Tuberculosis of unspecified limb bone                   |
| N3051 | Tuberculosis of the upper arm bone                      |
| N3052 | Tuberculosis of the forearm bone                        |
| N3053 | Tuberculosis of the pelvic and thigh bones              |
| N3054 | Tuberculosis of the lower leg bone                      |
| N3055 | Tuberculosis of other limb bones                        |
| N3056 | Tuberculosis of multiple limb bones                     |
| N305z | Tuberculosis of limb bones NOS                          |
| N306. | Tuberculosis of other bones                             |
| N3060 | Tuberculosis of bone, site unspecified                  |
| N3061 | Tuberculosis of the bones of the shoulder region        |
| N3062 | Tuberculosis of the bones of the hand                   |
| N3063 | Tuberculosis of the bones of the ankle and foot         |
| N3064 | Tuberculosis of the bones of other sites                |
| N3065 | Tuberculosis of the bones of multiple sites             |
| N306z | Tuberculosis of bone NOS                                |
| N307. | Osteopathy from poliomyelitis                           |
| N3070 | Poliomyelitis osteopathy of unspecified site            |
| N3071 | Poliomyelitis osteopathy of the shoulder region         |
| N3072 | Poliomyelitis osteopathy of the upper arm               |
| N3073 | Poliomyelitis osteopathy of the forearm                 |
| N3074 | Poliomyelitis osteopathy of the hand                    |
| N3075 | Poliomyelitis osteopathy of the pelvic region and thigh |
| N3076 | Poliomyelitis osteopathy of the lower leg               |
| N3077 | Poliomyelitis osteopathy of the ankle and foot          |
| N3078 | Poliomyelitis osteopathy of other specified sites       |
| N3079 | Poliomyelitis osteopathy of multiple sites              |
| N307z | Poliomyelitis osteopathy NOS                            |
| N308. | Subacute osteomyelitis                                  |
| N3080 | Subacute osteomyelitis-cervical spine                   |
| N3081 | Subacute osteomyelitis-thoracic spine                   |
| N3082 | Subacute osteomyelitis-lumbar spine                     |
| N3083 | Subacute osteomyelitis-sacrum                           |
| N3084 | Subacute osteomyelitis-coccyx                           |
| N309. | Subacute osteomyelitis                                  |
| N30y. | Other infections involving bone                         |
| N30y0 | Other infections involving bone, site unspecified       |
| N30y1 | Other infections involving bone, of the shoulder region |
| N30y2 | Other infections involving bone, of the upper arm       |
| N30y3 | Other infections involving bone, of the forearm         |
| N30y4 | Other infections involving bone, of the hand            |

|       |                                                                 |
|-------|-----------------------------------------------------------------|
| N30y5 | Other infections involving bone, of the pelvic region and thigh |
| N30y6 | Other infections involving bone, of the lower leg               |
| N30y7 | Other infections involving bone, of the ankle and foot          |
| N30y8 | Other infections involving bone, of other specified site        |
| N30y9 | Other infections involving bone, of multiple sites              |
| N30yz | Other infections involving bone, NOS                            |
| N30z. | Bone infection NOS                                              |
| N30z0 | Bone infection NOS, of unspecified site                         |
| N30z1 | Bone infection NOS, of the shoulder region                      |
| N30z2 | Bone infection NOS, of the upper arm                            |
| N30z3 | Bone infection NOS, of the forearm                              |
| N30z4 | Bone infection NOS, of the hand                                 |
| N30z5 | Bone infection NOS, of the pelvic/thigh                         |
| N30z6 | Bone infection NOS, of the lower leg                            |
| N30z7 | Bone infection NOS, of ankle and foot                           |
| N30z8 | Bone infection NOS, of other specified site                     |
| N30z9 | Bone infection NOS, of multiple sites                           |
| N30zz | Bone infection NOS                                              |
| N31.. | Osteitis deformans and osteopathies associated with diseases EC |
| N310. | Osteitis deformans - Paget's disease of the bone                |
| N3100 | Paget's disease-cervical spine                                  |
| N3101 | Paget's disease-thoracic spine                                  |
| N3102 | Paget's disease-lumbar spine                                    |
| N3103 | Paget's disease-sacrum                                          |
| N3104 | Paget's disease-coccyx                                          |
| N3105 | Paget's disease-clavicle                                        |
| N3106 | Paget's disease-scapula                                         |
| N3107 | Paget's disease-humerus                                         |
| N3108 | Paget's disease-radius                                          |
| N3109 | Paget's disease-ulna                                            |
| N310A | Paget's disease-carpal bone                                     |
| N310B | Paget's disease-metacarpal                                      |
| N310C | Paget's disease-phalanx of finger or thumb                      |
| N310D | Paget's disease-pelvis                                          |
| N310E | Paget's disease-femur                                           |
| N310F | Paget's disease-patella                                         |
| N310G | Paget's disease-tibia                                           |
| N310H | Paget's disease-fibula                                          |
| N310J | Paget's disease-calcaneum                                       |
| N310K | Paget's disease-talus                                           |
| N310L | Paget's disease-other tarsal bone                               |
| N310M | Paget's disease-metatarsal                                      |
| N310N | Paget's disease-phalanx of toe                                  |
| N310P | Paget's disease-skull                                           |
| N310x | Paget's disease-multiple sites                                  |
| N310y | Paget's disease OS                                              |
| N310z | Paget's disease NOS                                             |
| N311. | Osteitis deformans associated with diseases EC                  |

|       |                                                                 |
|-------|-----------------------------------------------------------------|
| N3110 | Osteitis deformans in neoplastic disease                        |
| N312. | Hypertrophic pulmonary osteoarthropathy                         |
| N31y. | Other bone involvement in diseases EC                           |
| N31z. | Bone involvement in diseases EC NOS                             |
| N32.. | Osteochondropathies                                             |
| N320. | Juvenile osteochondritis of the spine                           |
| N3200 | Juvenile osteochondritis of the spine, unspecified              |
| N3201 | Scheuermann's disease                                           |
| N3202 | Calve's vertebral osteochondritis                               |
| N320z | Juvenile osteochondritis of the spine NOS                       |
| N321. | Juvenile osteochondritis of the hip and pelvis                  |
| N3210 | Juvenile osteochondritis of the hip and pelvis, unspecified     |
| N3211 | Perthes' disease - osteochondritis of the femoral head          |
| N3212 | Ischiopubic synchondrosis                                       |
| N3213 | Juvenile osteochondritis of the acetabulum                      |
| N3214 | Juvenile osteochondritis of the iliac crest                     |
| N3215 | Juvenile osteochondritis of the symphysis pubis                 |
| N3216 | Coxa plana                                                      |
| N3217 | Pseudocoxalgia                                                  |
| N321z | Juvenile osteochondritis of the hip and pelvis NOS              |
| N322. | Non traumatic slipped upper femoral epiphysis                   |
| N3220 | Non traumatic acute slipped upper femoral epiphysis             |
| N3221 | Non traumatic acute-on-chronic slipped upper femoral epiphysis  |
| N3222 | Non traumatic chronic slipped upper femoral epiphysis           |
| N323. | Juvenile osteochondritis of the arm and hand                    |
| N3230 | Juvenile osteochondritis of the arm, unspecified                |
| N3231 | Juvenile osteochondritis of the hand, unspecified               |
| N3232 | Panner's disease - osteochondritis of capitulum of humerus      |
| N3233 | Kienbock's disease - osteochondritis of carpal lunate           |
| N3234 | Haas' disease - osteochondritis of head of humerus              |
| N3235 | Mauclaire's disease - osteochondritis of metacarpal heads       |
| N3236 | Burn's disease - osteochondritis of the lower ulna              |
| N3237 | Brailsford's disease - osteochondritis of the radial head       |
| N323z | Juvenile osteochondritis of the arm and hand NOS                |
| N324. | Juvenile osteochondrosis of the leg                             |
| N3240 | Juvenile osteochondrosis of the leg, unspecified                |
| N3241 | Kohler's disease - osteochondrosis of primary patella centre    |
| N3242 | Blount's disease - osteochondrosis of proximal tibia            |
| N3243 | Juvenile osteochondrosis of the secondary patellar centre       |
| N3244 | Osgood-Schlatter's disease - osteochondrosis of tibial tubercle |
| N324z | Juvenile osteochondrosis of the leg, NOS                        |
| N325. | Juvenile osteochondrosis of the foot                            |
| N3250 | Juvenile osteochondrosis of the foot, unspecified               |
| N3251 | Diaz's disease - osteochondrosis of astragalus                  |
| N3252 | Sever's disease - osteochondrosis of calcaneum                  |
| N3253 | Freiberg's disease - osteochondrosis of second metatarsal       |
| N3254 | Iselin's disease - osteochondrosis of fifth metatarsal          |
| N3255 | Haglund's disease - osteochondrosis of os tibiale externum      |

|       |                                                        |
|-------|--------------------------------------------------------|
| N3256 | Kohler's disease - osteochondrosis of tarsal navicular |
| N325z | Juvenile osteochondrosis of the foot NOS               |
| N326. | Other juvenile osteochondroses                         |
| N3260 | Juvenile apophysitis NOS                               |
| N3261 | Juvenile epiphysitis NOS                               |
| N3262 | Juvenile osteochondritis NOS                           |
| N3263 | Juvenile osteochondrosis NOS                           |
| N326z | Juvenile osteochondroses NOS                           |
| N327. | Osteochondritis dissecans                              |
| N3270 | Osteochondritis dissecans of patella                   |
| N3271 | Osteochondritis dissecans of lateral femoral condyle   |
| N3272 | Other osteochondritis dissecans of knee                |
| N3273 | Osteochondritis dissecans of the humeral head          |
| N3274 | Osteochondritis dissecans of the capitellum            |
| N3275 | Osteochondritis dissecans of the radial head           |
| N3276 | Other osteochondritis dissecans of the elbow           |
| N3277 | Osteochondritis dissecans of the wrist                 |
| N3278 | Osteochondritis dissecans of the femoral head          |
| N3279 | Osteochondritis dissecans of the talus                 |
| N327y | Osteochondritis dissecans of other site                |
| N328. | Juvenile osteochondrosis of spine                      |
| N32y. | Other specified forms of osteochondropathy             |
| N32y0 | Adult osteochondrosis of spine                         |
| N32y1 | Kienbock's disease of adults                           |
| N32yz | Other specified osteochondropathy NOS                  |
| N32z. | Osteochondropathy NOS                                  |
| N32z0 | Apophysitis NOS                                        |
| N32z1 | Epiphysitis NOS                                        |
| N32z2 | Osteochondritis NOS                                    |
| N32z3 | Osteochondrosis NOS                                    |
| N32zz | Osteochondropathy NOS                                  |
| N33.. | Other bone and cartilage disorders                     |
| N330. | Osteoporosis                                           |
| N3300 | Osteoporosis, unspecified                              |
| N3301 | Senile osteoporosis                                    |
| N3302 | Postmenopausal osteoporosis                            |
| N3303 | Idiopathic osteoporosis                                |
| N3304 | Dissuse osteoporosis                                   |
| N3305 | Drug-induced osteoporosis                              |
| N3306 | Postoophorectomy osteoporosis                          |
| N3307 | Postsurgical malabsorption osteoporosis                |
| N3308 | Localized osteoporosis - Lequesne                      |
| N3309 | Osteoporosis in multiple myelomatosis                  |
| N330A | Osteoporosis in endocrine disorders                    |
| N330B | Vertebral osteoporosis                                 |
| N330C | Osteoporosis localized to spine                        |
| N330D | Osteoporosis due to corticosteroids                    |
| N330z | Osteoporosis NOS                                       |

|       |                                                                    |
|-------|--------------------------------------------------------------------|
| N331. | Pathological fracture                                              |
| N3310 | Pathological fracture of thoracic vertebra                         |
| N3311 | Pathological fracture of lumbar vertebra                           |
| N3312 | Postoophorectomy osteoporosis with pathological fracture           |
| N3313 | Osteoporosis of disuse with pathological fracture                  |
| N3314 | Postsurgical malabsorption osteoporosis with pathological fracture |
| N3315 | Drug-induced osteoporosis with pathological fracture               |
| N3316 | Idiopathic osteoporosis with pathological fracture                 |
| N3317 | Fracture of bone in neoplastic disease                             |
| N3318 | Osteoporosis + pathological fracture lumbar vertebrae              |
| N3319 | Osteoporosis + pathological fracture thoracic vertebrae            |
| N331A | Osteoporosis + pathological fracture cervical vertebrae            |
| N331B | Postmenopausal osteoporosis with pathological fracture             |
| N331C | Pathological fracture of cervical vertebra                         |
| N331D | Collapsed vertebra NOS                                             |
| N331E | Collapse of cervical vertebra                                      |
| N331F | Collapse of thoracic vertebra                                      |
| N331G | Collapse of lumbar vertebra                                        |
| N331H | Collapse of cervical vertebra due to osteoporosis                  |
| N331J | Collapse of lumbar vertebra due to osteoporosis                    |
| N331K | Collapse of thoracic vertebra due to osteoporosis                  |
| N331L | Collapse of vertebra due to osteoporosis NOS                       |
| N331M | Fragility fracture due to unspecified osteoporosis                 |
| N331N | Fragility fracture                                                 |
| N331y | Other specified pathological fracture                              |
| N331z | Pathological fracture NOS                                          |
| N332. | Cyst of bone                                                       |
| N3320 | Localised bone cyst, unspecified                                   |
| N3321 | Solitary bone cyst                                                 |
| N3322 | Aneurysmal bone cyst                                               |
| N3323 | Monostotic fibrous dysplasia                                       |
| N3324 | Fibrous cortical defect                                            |
| N3325 | Brown tumour of hyperparathyroidism                                |
| N332z | Cyst of bone NOS                                                   |
| N333. | Hyperostosis of skull                                              |
| N3330 | Hyperostosis interna frontalis                                     |
| N3331 | Leontiasis ossium                                                  |
| N333z | Hyperostosis of skull NOS                                          |
| N334. | Avascular necrosis of bone                                         |
| N3340 | Avascular necrosis of bone, site unspecified                       |
| N3341 | Avascular necrosis of the head of humerus                          |
| N3342 | Avascular necrosis of the head of femur                            |
| N3343 | Avascular necrosis of the medial femoral condyle                   |
| N3344 | Avascular necrosis of the talus                                    |
| N3345 | Avascular necrosis of capitellum                                   |
| N3346 | Avascular necrosis of lateral femoral condyle                      |
| N3347 | Avascular necrosis of other bone                                   |
| N3348 | Idiopathic aseptic necrosis of bone                                |

|       |                                                   |
|-------|---------------------------------------------------|
| N3349 | Osteonecrosis due to drugs                        |
| N334A | Osteonecrosis due to previous trauma              |
| N334B | Osteonecrosis in caisson disease                  |
| N334C | Osteonecrosis due to haemoglobinopathy            |
| N334z | Avascular bone necrosis NOS                       |
| N335. | Osteitis condensans                               |
| N3350 | Osteitis condensans ilii                          |
| N336. | Tietze's disease                                  |
| N337. | Algoneurodystrophy                                |
| N3370 | Disuse atrophy of bone                            |
| N3371 | Sudek's atrophy                                   |
| N3372 | Algodystrophy of hand                             |
| N3373 | Algodystrophy of knee                             |
| N3374 | Algodystrophy of foot                             |
| N337z | Algoneurodystrophy NOS                            |
| N338. | Malunion and nonunion of fracture                 |
| N3380 | Malunion of fracture                              |
| N3381 | Pseudoarthrosis - fracture nonunion               |
| N3382 | Hypertrophic non-union of fracture                |
| N3383 | Atrophic non-union of fracture                    |
| N3384 | Angular mal-union of fracture                     |
| N3385 | Rotational mal-union of fracture                  |
| N3386 | Delayed union of fracture                         |
| N338z | Fracture malunion or nonunion NOS                 |
| N339. | Residual foreign body in bone                     |
| N33A. | Bone pain                                         |
| N33A0 | Bony pelvic pain                                  |
| N33A1 | Clavicle pain                                     |
| N33B. | Osteoradionecrosis                                |
| N33C. | Complex regional pain syndrome type I             |
| N33z. | Other and unspecified bone or cartilage disorders |
| N33z0 | Bone and cartilage disorders, unspecified         |
| N33z1 | Epiphyseal arrest                                 |
| N33z2 | Chondromalacia NOS                                |
| N33z3 | Diaphysitis                                       |
| N33z4 | Hypertrophy of bone                               |
| N33z5 | Relapsing polychondritis                          |
| N33z6 | Compensatory hypertrophy of bone                  |
| N33z7 | Idiopathic hypertrophy of bone                    |
| N33z8 | Complete epiphyseal arrest                        |
| N33z9 | Partial epiphyseal arrest                         |
| N33zA | Skeletal fluorosis                                |
| N33zB | Chondrolysis                                      |
| N33zC | Pseudarthrosis after fusion or arthrodesis        |
| N33zD | Osteolysis                                        |
| N33zE | Costochondritis                                   |
| N33zF | Disorder of bone, unspecified                     |
| N33zG | Disorder of cartilage, unspecified                |

|       |                                               |
|-------|-----------------------------------------------|
| N33zH | Osteolytic lesion                             |
| N33zJ | Chondritis                                    |
| N33zK | Hajdu-Cheney syndrome                         |
| N33zL | Osteitis of symphysis pubis                   |
| N33zM | Adynamic bone disease                         |
| N33zz | Bone or cartilage disorders NOS               |
| N34.. | Flat foot                                     |
| N340. | Pes planus - acquired                         |
| N3400 | Hypermobile flat foot                         |
| N3401 | Rigid flat foot                               |
| N3402 | Peroneal spastic flat foot                    |
| N341. | Talipes planus - acquired                     |
| N34z. | Flat foot NOS                                 |
| N35.. | Acquired deformities of toe                   |
| N350. | Hallux valgus - acquired                      |
| N351. | Hallux varus - acquired                       |
| N352. | Hallux rigidus - acquired                     |
| N353. | Acquired hammer deformity of great toe        |
| N354. | Other hammer toe - acquired                   |
| N355. | Claw toe - acquired                           |
| N356. | Clawing of great toe                          |
| N357. | Crossover toe                                 |
| N358. | Mallet toe                                    |
| N359. | Bunionette                                    |
| N35A. | Over-riding 5th toe                           |
| N35B. | Acquired varus deformity of toe               |
| N35C. | Acquired hammer toe, other than great toe     |
| N35y. | Other acquired toe deformity                  |
| N35z. | Acquired toe deformity NOS                    |
| N36.. | Other acquired limb deformity                 |
| N360. | Acquired forearm deformity, excluding fingers |
| N3600 | Acquired forearm deformity, unspecified       |
| N3601 | Cubitus valgus - acquired                     |
| N3602 | Cubitus varus - acquired                      |
| N3603 | Acquired valgus wrist deformity               |
| N3604 | Acquired varus wrist deformity                |
| N3605 | Wrist drop - acquired                         |
| N3606 | Claw hand - acquired                          |
| N3607 | Club hand - acquired                          |
| N360z | Acquired forearm deformity NOS                |
| N361. | Mallet finger                                 |
| N362. | Other acquired finger deformity               |
| N3620 | Acquired finger deformity, unspecified        |
| N3621 | Boutonniere finger deformity                  |
| N3622 | Swan-neck finger deformity                    |
| N3623 | Flexion deformity of finger                   |
| N3624 | Extension deformity of finger                 |
| N3625 | Deviation of finger                           |



|       |                                                      |
|-------|------------------------------------------------------|
| N3626 | Rotational deformity of finger                       |
| N362z | Acquired finger deformity NOS                        |
| N363. | Acquired deformities of hip                          |
| N3630 | Acquired hip deformity, unspecified                  |
| N3631 | Coxa valga - acquired                                |
| N3632 | Coxa vara - acquired                                 |
| N3633 | Acquired internal femoral torsion                    |
| N3634 | Persistent femoral anteversion                       |
| N3635 | Acquired external femoral torsion                    |
| N363z | Acquired hip deformity NOS                           |
| N364. | Acquired genu valgum and varum                       |
| N3640 | Acquired genu valgum                                 |
| N3641 | Acquired genu varum                                  |
| N364z | Acquired genu valgum or varum NOS                    |
| N365. | Genu recurvatum - acquired                           |
| N366. | Acquired knee deformity NOS                          |
| N3660 | Flexion deformity of knee                            |
| N367. | Other acquired ankle and foot deformity              |
| N3670 | Acquired ankle or foot deformity, unspecified        |
| N3671 | Acquired equinovarus - clubfoot                      |
| N3672 | Acquired equinus foot deformity                      |
| N3673 | Acquired cavus foot deformity                        |
| N3674 | Acquired claw foot                                   |
| N3675 | Acquired cavovarus foot deformity                    |
| N3676 | Other acquired calcaneus deformity                   |
| N3677 | Acquired talipes NEC                                 |
| N3678 | Acquired varus heel                                  |
| N3679 | Acquired valgus heel                                 |
| N367A | Plantar flexion of the midtarsal joint               |
| N367B | Plantar flexion contracture of tarsometatarsal joint |
| N367C | Flexion contracture of metatarsophalangeal joint     |
| N367D | Extension contracture of metatarsophalangeal joint   |
| N367E | Flexion contracture of toe joint                     |
| N367F | Acquired plantar-flexed forefoot                     |
| N367G | Acquired plantar-flexed first ray                    |
| N367H | Acquired plantar-flexed fifth ray                    |
| N367J | Acquired dorsiflexed forefoot                        |
| N367K | Acquired dorsiflexed first ray                       |
| N367L | Acquired supinated forefoot                          |
| N367M | Acquired pronated forefoot                           |
| N367N | Acquired forefoot adductus                           |
| N367P | Acquired forefoot abductus                           |
| N367Q | Serpentine foot                                      |
| N367z | Acquired ankle or foot deformity NOS                 |
| N368. | Other knee deformity                                 |
| N3680 | Acquired internal tibial torsion                     |
| N3681 | Acquired external tibial torsion                     |
| N3682 | Chronic instability of knee                          |

|       |                                            |
|-------|--------------------------------------------|
| N369. | Flexion deformity                          |
| N36A. | Foot drop                                  |
| N36y. | Acquired deformity of other limb parts     |
| N36y0 | Acquired unequal leg length                |
| N36y1 | Acquired unequal arm length                |
| N36y2 | Deformity of bone                          |
| N36y3 | Deformity of clavicle                      |
| N36y4 | Deformity of scapula                       |
| N36y5 | Deformity of humerus                       |
| N36y6 | Deformity of radius                        |
| N36y7 | Deformity of ulna                          |
| N36y8 | Deformity of carpal bone                   |
| N36y9 | Deformity of metacarpal                    |
| N36yA | Deformity of phalanx of finger or thumb    |
| N36yB | Deformity of pelvis                        |
| N36yC | Deformity of femur                         |
| N36yD | Deformity of patella                       |
| N36yE | Deformity of tibia                         |
| N36yF | Deformity of fibula                        |
| N36yG | Deformity of calcaneum                     |
| N36yH | Deformity of talus                         |
| N36yJ | Deformity of other tarsal bone             |
| N36yK | Deformity of metatarsal                    |
| N36yL | Deformity of phalanx of toe                |
| N36yM | Old amputee NOS                            |
| N36yN | Acquired radial deviation of hand          |
| N36yz | Acquired limb deformity NEC                |
| N36z. | Acquired limb deformity NOS                |
| N37.. | Curvature of spine                         |
| N370. | Adolescent postural kyphosis               |
| N371. | Acquired kyphosis                          |
| N3710 | Acquired postural kyphosis                 |
| N3711 | Radiation kyphosis                         |
| N3712 | Post-laminectomy kyphosis                  |
| N3713 | Kyphosis secondary to other treatment      |
| N371z | Acquired kyphosis NOS                      |
| N372. | Acquired lordosis                          |
| N3720 | Acquired postural lordosis                 |
| N3721 | Post-laminectomy lordosis                  |
| N3722 | Other post-surgical lordosis               |
| N372z | Acquired lordosis NOS                      |
| N373. | Kyphoscoliosis and scoliosis               |
| N3730 | Idiopathic scoliosis                       |
| N3731 | Idiopathic kyphoscoliosis                  |
| N3732 | Resolving infantile idiopathic scoliosis   |
| N3733 | Progressive infantile idiopathic scoliosis |
| N3734 | Radiation scoliosis                        |
| N3735 | Thoracogenic scoliosis                     |

|       |                                                         |
|-------|---------------------------------------------------------|
| N3736 | Postural scoliosis                                      |
| N3737 | Adolescent idiopathic scoliosis                         |
| N3738 | Post-surgical scoliosis                                 |
| N3739 | Scoliosis secondary to other treatment                  |
| N373z | Kyphoscoliosis or scoliosis NOS                         |
| N374. | Curvature of spine associated with other conditions     |
| N3740 | Curvature of spine, unspecified                         |
| N3741 | Kyphosis associated with other condition                |
| N3742 | Lordosis associated with other condition                |
| N3743 | Scoliosis associated with other condition               |
| N3744 | Kyphosis in skeletal dysplasia                          |
| N3745 | Neuromuscular kyphosis                                  |
| N3746 | Osteoporotic kyphosis                                   |
| N3747 | Lordosis in skeletal dysplasia                          |
| N3748 | Lordosis in hip disease                                 |
| N3749 | Neuromuscular lordosis                                  |
| N374A | Scoliosis in skeletal dysplasia                         |
| N374B | Neuromuscular scoliosis                                 |
| N374C | Scoliosis in neurofibromatosis                          |
| N374D | Scoliosis in connective tissue anomalies                |
| N374E | Flatback syndrome                                       |
| N374W | Lordosis, unspecified                                   |
| N374X | Other and unspecified kyphosis                          |
| N374z | Curvature of spine associated with other conditions NOS |
| N37y. | Other curvatures of spine                               |
| N37z. | Curvature of spine NOS                                  |
| N37z0 | Acquired hunchback                                      |
| N37zz | Curvature of spine NOS                                  |
| N38.. | Other acquired deformity                                |
| N380. | Acquired deformity of nose                              |
| N381. | Other acquired head deformity                           |
| N382. | Acquired deformity of neck                              |
| N383. | Acquired chest and rib deformity                        |
| N3830 | Acquired chest deformity, unspecified                   |
| N3831 | Acquired rib deformity, unspecified                     |
| N3832 | Acquired pectus carinatum                               |
| N3833 | Acquired pectus excavatum                               |
| N383z | Acquired chest or rib deformity NOS                     |
| N384. | Acquired spondylolisthesis                              |
| N3840 | Dysplastic spondylolisthesis                            |
| N3841 | Isthmic spondylolisthesis                               |
| N3842 | Degenerative spondylolisthesis                          |
| N3843 | Pedicular spondylolisthesis                             |
| N385. | Acquired deformity of spine NOS                         |
| N386. | Acquired deformity of pelvis                            |
| N387. | Cauliflower ear                                         |
| N388. | Spondylolysis                                           |
| N38y. | Other acquired deformity                                |

|       |                                                                                  |
|-------|----------------------------------------------------------------------------------|
| N38y0 | Acquired clavicle deformity                                                      |
| N38yz | Other acquired deformity NOS                                                     |
| N38z. | Acquired deformity NOS                                                           |
| N39.. | Nonallopathic lesions, NEC                                                       |
| N390. | Nonallopathic lesion of the head region                                          |
| N391. | Nonallopathic lesion of the cervical region                                      |
| N392. | Nonallopathic lesion of the thoracic region                                      |
| N393. | Nonallopathic lesion of the lumbar region                                        |
| N394. | Nonallopathic lesion of the sacral region                                        |
| N395. | Nonallopathic lesion of the pelvic region                                        |
| N396. | Nonallopathic lesion of the legs                                                 |
| N397. | Nonallopathic lesion of the arms                                                 |
| N398. | Nonallopathic lesion of the rib cage                                             |
| N399. | Nonallopathic lesion of the abdomen and other regions                            |
| N39z. | Nonallopathic lesion NEC NOS                                                     |
| N3y.. | Other specified musculoskeletal disorders                                        |
| N3y0. | Biomechanical lesions, not elsewhere classified                                  |
| N3y00 | Segmental and somatic dysfunction                                                |
| N3y01 | Subluxation complex (vertebral)                                                  |
| N3y02 | Subluxation stenosis of neural canal                                             |
| N3y03 | Osseous stenosis of neural canal                                                 |
| N3y04 | Connective tissue stenosis of neural canal                                       |
| N3y05 | Intervertebral disc stenosis of neural canal                                     |
| N3y06 | Osseous and subluxation stenosis of intervertebral foramina                      |
| N3y07 | Connective tissue and disc stenosis of intervertebral foramina                   |
| N3z.. | Other musculoskeletal disorder NOS                                               |
| Ny... | Other specified diseases of musculoskeletal or connective tissue                 |
| Ny2.. | Repetitive strain injury                                                         |
| Ny20. | Work related upper limb disorder                                                 |
| NyX.. | Postprocedural musculoskeletal disorder, unspecified                             |
| Nyu.. | [X]Additional musculoskeletal and connective tissue disease classification terms |
| Nyu0. | [X]Infectious arthropathies                                                      |
| Nyu00 | [X]Other streptococcal arthritis and polyarthritis                               |
| Nyu01 | [X]Arthritis and polyarthritis due to other specified bacterial agents           |
| Nyu02 | [X]Arthritis in other infectious and parasitic diseases classified elsewhere     |
| Nyu03 | [X]Other reactive arthropathies                                                  |
| Nyu04 | [X]Other postinfectious arthropathies in diseases classified elsewhere           |
| Nyu05 | [X]Reactive arthropathy in other diseases classified elsewhere                   |
| Nyu1. | [X]Inflammatory polyarthropathies                                                |
| Nyu10 | [X]Rheumatoid arthritis with involvement of other organs or systems              |
| Nyu11 | [X]Other seropositive rheumatoid arthritis                                       |
| Nyu12 | [X]Other specified rheumatoid arthritis                                          |
| Nyu13 | [X]Other psoriatic arthropathies                                                 |
| Nyu14 | [X]Other enteropathic arthropathies                                              |
| Nyu15 | [X]Other juvenile arthritis                                                      |
| Nyu16 | [X]Juvenile arthritis in other diseases classified elsewhere                     |
| Nyu17 | [X]Other secondary gout                                                          |
| Nyu18 | [X]Other chondrocalcinosis                                                       |

|       |                                                                                               |
|-------|-----------------------------------------------------------------------------------------------|
| Nyu19 | [X]Other specified crystal arthropathies                                                      |
| Nyu1A | [X]Other specific arthropathies, not elsewhere classified                                     |
| Nyu1B | [X]Other specified arthritis                                                                  |
| Nyu1C | [X]Gouty arthropathy due to enzyme defects and other inherited disorders classified elsewhere |
| Nyu1D | [X]Crystal arthropathy in other metabolic disorders classified elsewhere                      |
| Nyu1E | [X]Arthropathies in other endocrine, nutritional and metabolic disorders                      |
| Nyu1F | [X]Arthropathies in other specified diseases classified elsewhere                             |
| Nyu1G | [X]Seropositive rheumatoid arthritis, unspecified                                             |
| Nyu2. | [X]Arthrosis                                                                                  |
| Nyu20 | [X]Other polyarthrosis                                                                        |
| Nyu21 | [X]Other primary coxarthrosis                                                                 |
| Nyu22 | [X]Other dysplastic coxarthrosis                                                              |
| Nyu23 | [X]Other post-traumatic coxarthrosis                                                          |
| Nyu24 | [X]Other secondary coxarthrosis, bilateral                                                    |
| Nyu25 | [X]Other primary gonarthrosis                                                                 |
| Nyu26 | [X]Other post-traumatic gonarthrosis                                                          |
| Nyu27 | [X]Other secondary gonarthrosis, bilateral                                                    |
| Nyu28 | [X]Other secondary gonarthrosis                                                               |
| Nyu29 | [X]Other primary arthrosis of first carpometacarpal joint                                     |
| Nyu2A | [X]Other post-traumatic arthrosis of first carpometacarpal joint                              |
| Nyu2B | [X]Other secondary arthrosis of first carpometacarpal joints, bilateral                       |
| Nyu2C | [X]Other secondary arthrosis of first carpometacarpal joint                                   |
| Nyu2D | [X]Other specified arthrosis                                                                  |
| Nyu2E | [X]Other secondary coxarthrosis                                                               |
| Nyu2F | [X]Post-traumatic arthrosis of other joints                                                   |
| Nyu3. | [X]Other joint disorders                                                                      |
| Nyu30 | [X]Other deformity of hallux (acquired)                                                       |
| Nyu31 | [X]Other hammer toe(s) (acquired)                                                             |
| Nyu32 | [X]Other deformities of toe(s) (acquired)                                                     |
| Nyu33 | [X]Other acquired deformities of ankle and foot                                               |
| Nyu34 | [X]Other specified acquired deformities of limbs                                              |
| Nyu35 | [X]Other derangements of patella                                                              |
| Nyu36 | [X]Other disorders of patella                                                                 |
| Nyu37 | [X]Other meniscus derangements                                                                |
| Nyu38 | [X]Other spontaneous disruption of ligament(s) of knee                                        |
| Nyu39 | [X]Other internal derangements of knee                                                        |
| Nyu3A | [X]Other articular cartilage disorders                                                        |
| Nyu3B | [X]Other specific joint derangements, not elsewhere classified                                |
| Nyu3C | [X]Other instability of joint                                                                 |
| Nyu3D | [X]Other specified joint disorders                                                            |
| Nyu3E | [X]Disorder of patella, unspecified                                                           |
| Nyu4. | [X]Systemic connective tissue disorders                                                       |
| Nyu40 | [X]Other conditions related to polyarteritis nodosa                                           |
| Nyu41 | [X]Other giant cell arteritis                                                                 |
| Nyu42 | [X]Other specified necrotizing vasculopathies                                                 |
| Nyu43 | [X]Other forms of systemic lupus erythematosus                                                |
| Nyu44 | [X]Other dermatomyositis                                                                      |

|       |                                                                                   |
|-------|-----------------------------------------------------------------------------------|
| Nyu45 | [X]Other forms of systemic sclerosis                                              |
| Nyu46 | [X]Other overlap syndromes                                                        |
| Nyu47 | [X]Other systemic diseases of connective tissue                                   |
| Nyu48 | [X]Dermato(poly)myositis in neoplastic disease classified elsewhere               |
| Nyu49 | [X]Arthropathy in neoplastic disease classified elsewhere                         |
| Nyu4A | [X]Arthropathy in other blood disorders classified elsewhere                      |
| Nyu4B | [X]Arthropathy in hypersensitivity reactions classified elsewhere                 |
| Nyu4C | [X]Systemic disorders of connective tissue in other diseases classified elsewhere |
| Nyu4D | [X]Necrotising vasculopathy, unspecified                                          |
| Nyu4E | [X]Dermatopolymyositis, unspecified                                               |
| Nyu4F | [X]Mixed connective tissue disease                                                |
| Nyu5. | [X]Deforming dorsopathies                                                         |
| Nyu50 | [X]Other secondary kyphosis                                                       |
| Nyu51 | [X]Other and unspecified kyphosis                                                 |
| Nyu52 | [X]Other lordosis                                                                 |
| Nyu53 | [X]Other idiopathic scoliosis                                                     |
| Nyu54 | [X]Other secondary scoliosis                                                      |
| Nyu55 | [X]Other forms of scoliosis                                                       |
| Nyu56 | [X]Other fusion of spine                                                          |
| Nyu57 | [X]Other recurrent atlantoaxial subluxation                                       |
| Nyu58 | [X]Other recurrent vertebral subluxation                                          |
| Nyu59 | [X]Other specified deforming dorsopathies                                         |
| Nyu5A | [X]Lordosis, unspecified                                                          |
| Nyu5B | [X]Spinal osteochondrosis, unspecified                                            |
| Nyu6. | [X]Spondylopathies                                                                |
| Nyu60 | [X]Other infective spondylopathies                                                |
| Nyu61 | [X]Other specified inflammatory spondylopathies                                   |
| Nyu62 | [X]Other spondylosis with myelopathy                                              |
| Nyu63 | [X]Other spondylosis with radiculopathy                                           |
| Nyu64 | [X]Other spondylosis                                                              |
| Nyu65 | [X]Other specified spondylopathies                                                |
| Nyu66 | [X]Spondylopathy in other infectious and parasitic diseases classified elsewhere  |
| Nyu67 | [X]Collapsed vertebra in diseases classified elsewhere                            |
| Nyu68 | [X]Spondylopathy in other diseases classified elsewhere                           |
| Nyu69 | [X]Spondylopathy, unspecified                                                     |
| Nyu7. | [X]Other dorsopathies                                                             |
| Nyu70 | [X]Other cervical disc displacement                                               |
| Nyu71 | [X]Other cervical disc degeneration                                               |
| Nyu72 | [X]Other cervical disc disorders                                                  |
| Nyu73 | [X]Lumbar and other intervertebral disc disorders with myelopathy                 |
| Nyu74 | [X]Lumbar and other intervertebral disc disorders with radiculopathy              |
| Nyu75 | [X]Other specified intervertebral disc displacement                               |
| Nyu76 | [X]Other specified intervertebral disc degeneration                               |
| Nyu77 | [X]Other specified intervertebral disc disorders                                  |
| Nyu78 | [X]Sacrococcygeal disorders, not elsewhere classified                             |
| Nyu79 | [X]Other specified dorsopathies                                                   |
| Nyu7A | [X]Other dorsalgia                                                                |
| Nyu7B | [X]Cervical disc disorder, unspecified                                            |

|       |                                                                            |
|-------|----------------------------------------------------------------------------|
| Nyu8. | [X]Disorders of muscles                                                    |
| Nyu80 | [X]Other myositis                                                          |
| Nyu81 | [X]Other calcification of muscle                                           |
| Nyu82 | [X]Other ossification of muscle                                            |
| Nyu83 | [X]Other rupture of muscle (nontraumatic)                                  |
| Nyu84 | [X]Muscle wasting and atrophy, not elsewhere classified                    |
| Nyu85 | [X]Other specified disorders of muscle                                     |
| Nyu86 | [X]Myositis in bacterial diseases classified elsewhere                     |
| Nyu87 | [X]Myositis in protozoal and parasitic infections classified elsewhere     |
| Nyu88 | [X]Myositis in other infectious diseases classified elsewhere              |
| Nyu89 | [X]Myositis in sarcoidosis classified elsewhere                            |
| Nyu8A | [X]Other disorders of muscle in diseases classified elsewhere              |
| Nyu8B | [X]Disorder of muscle, unspecified                                         |
| Nyu9. | [X]Disorders of synovium and tendon                                        |
| Nyu90 | [X]Other infective (teno)synovitis                                         |
| Nyu91 | [X]Other synovitis and tenosynovitis                                       |
| Nyu92 | [X]Spontaneous rupture of other tendons                                    |
| Nyu93 | [X]Other contracture of tendon (sheath)                                    |
| Nyu94 | [X]Other specified disorders of synovium and tendon                        |
| Nyu95 | [X]Synovitis and tenosynovitis in bacterial diseases classified elsewhere  |
| Nyu96 | [X]Other disorders of synovium and tendon in diseases classified elsewhere |
| Nyu97 | [X]Synovial hypertrophy, not elsewhere classified                          |
| NyuA. | [X]Other soft tissue disorders                                             |
| NyuA0 | [X]Other bursitis of elbow                                                 |
| NyuA1 | [X]Other bursitis of knee                                                  |
| NyuA2 | [X]Other bursitis of hip                                                   |
| NyuA3 | [X]Other soft tissue disorders related to use, overuse and pressure        |
| NyuA4 | [X]Other infective bursitis                                                |
| NyuA5 | [X]Other bursal cyst                                                       |
| NyuA6 | [X]Other bursitis, not elsewhere classified                                |
| NyuA7 | [X]Other specified bursopathies                                            |
| NyuA8 | [X]Fasciitis, not elsewhere classified                                     |
| NyuA9 | [X]Other fibroblastic disorders                                            |
| NyuAA | [X]Other soft tissue disorders in other diseases classified elsewhere      |
| NyuAB | [X]Other shoulder lesions                                                  |
| NyuAC | [X]Other enthesopathies of lower limb, excluding foot                      |
| NyuAD | [X]Other enthesopathy of foot                                              |
| NyuAE | [X]Other enthesopathies, not elsewhere classified                          |
| NyuAF | [X]Other specified soft tissue disorders                                   |
| NyuAG | [X]Unspecified soft tissue disorder related to use, overuse and pressure   |
| NyuAH | [X]Fibroblastic disorder, unspecified                                      |
| NyuAJ | [X]Enthesopathy of lower limb, unspecified                                 |
| NyuB. | [X]Disorders of bone density and structure                                 |
| NyuB0 | [X]Other osteoporosis with pathological fracture                           |
| NyuB1 | [X]Other osteoporosis                                                      |
| NyuB2 | [X]Osteoporosis in other disorders classified elsewhere                    |
| NyuB3 | [X]Other drug-induced osteomalacia in adults                               |
| NyuB4 | [X]Other adult osteomalacia                                                |

|       |                                                                                                 |
|-------|-------------------------------------------------------------------------------------------------|
| NyuB5 | [X]Other disorders of continuity of bone                                                        |
| NyuB6 | [X]Other cyst of bone                                                                           |
| NyuB7 | [X]Other specified disorders of bone density and structure                                      |
| NyuB8 | [X]Unspecified osteoporosis with pathological fracture                                          |
| NyuB9 | [X]Adult osteomalacia, unspecified                                                              |
| NyuBA | [X]Disorder of bone density and structure, unspecified                                          |
| NyuBB | [X]Erosion of bone                                                                              |
| NyuBC | [X]Osteopenia                                                                                   |
| NyuC. | [X]Other osteopathies                                                                           |
| NyuC0 | [X]Other acute osteomyelitis                                                                    |
| NyuC1 | [X]Other chronic haematogenous osteomyelitis                                                    |
| NyuC2 | [X]Other chronic osteomyelitis                                                                  |
| NyuC3 | [X]Other osteomyelitis                                                                          |
| NyuC4 | [X]Other secondary osteonecrosis                                                                |
| NyuC5 | [X]Other osteonecrosis                                                                          |
| NyuC6 | [X]Other disorders of bone development and growth                                               |
| NyuC7 | [X]Other hypertrophic osteoarthropathy                                                          |
| NyuC8 | [X]Other specified disorders of bone                                                            |
| NyuC9 | [X]Periostitis in other infectious diseases classified elsewhere                                |
| NyuCA | [X]Osteopathy in other infectious diseases classified elsewhere                                 |
| NyuCB | [X]Osteonecrosis due to haemoglobinopathy classified elsewhere                                  |
| NyuCC | [X]Osteonecrosis in other diseases classified elsewhere                                         |
| NyuCD | [X]Osteitis deformans in neoplastic diseases classified elsewhere                               |
| NyuCE | [X]Fracture of bone in neoplastic diseases classified elsewhere                                 |
| NyuCF | [X]Osteopathy in other diseases classified elsewhere                                            |
| NyuD. | [X]Chondropathies                                                                               |
| NyuD0 | [X]Other juvenile osteochondrosis of hip and pelvis                                             |
| NyuD1 | [X]Other juvenile osteochondrosis of upper limb                                                 |
| NyuD2 | [X]Other specified juvenile osteochondrosis                                                     |
| NyuD3 | [X]Other specified osteochondropathies                                                          |
| NyuD4 | [X]Other specified disorders of cartilage                                                       |
| NyuDE | [X]Disorder of cartilage, unspecified                                                           |
| NyuE. | [X]Other disorders of the musculoskeletal system and connective tissue                          |
| NyuE0 | [X]Other specified acquired deformities of musculoskeletal system                               |
| NyuE1 | [X]Fracture of bone following insertion of orthopaedic implant, joint prosthesis, or bone plate |
| NyuE2 | [X]Other postprocedural musculoskeletal disorders                                               |
| NyuE3 | [X]Other biomechanical lesions                                                                  |
| NyuE4 | [X]Postprocedural musculoskeletal disorder, unspecified                                         |
| Nz... | Musculoskeletal and connective tissue diseases NOS                                              |

## Hospital

| ALT_COD | DESCRIPTION                                |
|---------|--------------------------------------------|
| E       |                                            |
| M00     | Pyogenic arthritis                         |
| M000    | Staphylococcal arthritis and polyarthritis |
| M0000   | Staphylococcal arthritis and polyarthritis |



|       |                                                                     |
|-------|---------------------------------------------------------------------|
| M0001 | Staphylococcal arthritis and polyarthritis                          |
| M0002 | Staphylococcal arthritis and polyarthritis                          |
| M0003 | Staphylococcal arthritis and polyarthritis                          |
| M0004 | Staphylococcal arthritis and polyarthritis                          |
| M0005 | Staphylococcal arthritis and polyarthritis                          |
| M0006 | Staphylococcal arthritis and polyarthritis                          |
| M0007 | Staphylococcal arthritis and polyarthritis                          |
| M0008 | Staphylococcal arthritis and polyarthritis                          |
| M0009 | Staphylococcal arthritis and polyarthritis                          |
| M001  | Pneumococcal arthritis and polyarthritis                            |
| M0010 | Pneumococcal arthritis and polyarthritis                            |
| M0011 | Pneumococcal arthritis and polyarthritis                            |
| M0012 | Pneumococcal arthritis and polyarthritis                            |
| M0013 | Pneumococcal arthritis and polyarthritis                            |
| M0014 | Pneumococcal arthritis and polyarthritis                            |
| M0015 | Pneumococcal arthritis and polyarthritis                            |
| M0016 | Pneumococcal arthritis and polyarthritis                            |
| M0017 | Pneumococcal arthritis and polyarthritis                            |
| M0018 | Pneumococcal arthritis and polyarthritis                            |
| M0019 | Pneumococcal arthritis and polyarthritis                            |
| M002  | Other streptococcal arthritis and polyarthritis                     |
| M0020 | Other streptococcal arthritis and polyarthritis                     |
| M0021 | Other streptococcal arthritis and polyarthritis                     |
| M0022 | Other streptococcal arthritis and polyarthritis                     |
| M0023 | Other streptococcal arthritis and polyarthritis                     |
| M0024 | Other streptococcal arthritis and polyarthritis                     |
| M0025 | Other streptococcal arthritis and polyarthritis                     |
| M0026 | Other streptococcal arthritis and polyarthritis                     |
| M0027 | Other streptococcal arthritis and polyarthritis                     |
| M0028 | Other streptococcal arthritis and polyarthritis                     |
| M0029 | Other streptococcal arthritis and polyarthritis                     |
| M008  | Arthritis and polyarthritis due to other specified bacterial agents |
| M0080 | Arthritis and polyarthritis due to other specified bacterial agents |
| M0081 | Arthritis and polyarthritis due to other specified bacterial agents |
| M0082 | Arthritis and polyarthritis due to other specified bacterial agents |
| M0083 | Arthritis and polyarthritis due to other specified bacterial agents |
| M0084 | Arthritis and polyarthritis due to other specified bacterial agents |
| M0085 | Arthritis and polyarthritis due to other specified bacterial agents |
| M0086 | Arthritis and polyarthritis due to other specified bacterial agents |
| M0087 | Arthritis and polyarthritis due to other specified bacterial agents |
| M0088 | Arthritis and polyarthritis due to other specified bacterial agents |
| M0089 | Arthritis and polyarthritis due to other specified bacterial agents |
| M009  | Pyogenic arthritis, unspecified                                     |
| M0090 | Pyogenic arthritis, unspecified                                     |
| M0091 | Pyogenic arthritis, unspecified                                     |
| M0092 | Pyogenic arthritis, unspecified                                     |
| M0093 | Pyogenic arthritis, unspecified                                     |
| M0094 | Pyogenic arthritis, unspecified                                     |

|       |                                                                                      |
|-------|--------------------------------------------------------------------------------------|
| M0095 | Pyogenic arthritis, unspecified                                                      |
| M0096 | Pyogenic arthritis, unspecified                                                      |
| M0097 | Pyogenic arthritis, unspecified                                                      |
| M0098 | Pyogenic arthritis, unspecified                                                      |
| M0099 | Pyogenic arthritis, unspecified                                                      |
| M01   | Direct infections of joint in infectious and parasitic diseases classified elsewhere |
| M010  | Meningococcal arthritis                                                              |
| M0100 | Meningococcal arthritis                                                              |
| M0101 | Meningococcal arthritis                                                              |
| M0102 | Meningococcal arthritis                                                              |
| M0103 | Meningococcal arthritis                                                              |
| M0104 | Meningococcal arthritis                                                              |
| M0105 | Meningococcal arthritis                                                              |
| M0106 | Meningococcal arthritis                                                              |
| M0107 | Meningococcal arthritis                                                              |
| M0108 | Meningococcal arthritis                                                              |
| M0109 | Meningococcal arthritis                                                              |
| M011  | Tuberculous arthritis                                                                |
| M0110 | Tuberculous arthritis                                                                |
| M0111 | Tuberculous arthritis                                                                |
| M0112 | Tuberculous arthritis                                                                |
| M0113 | Tuberculous arthritis                                                                |
| M0114 | Tuberculous arthritis                                                                |
| M0115 | Tuberculous arthritis                                                                |
| M0116 | Tuberculous arthritis                                                                |
| M0117 | Tuberculous arthritis                                                                |
| M0118 | Tuberculous arthritis                                                                |
| M0119 | Tuberculous arthritis                                                                |
| M012  | Arthritis in Lyme disease                                                            |
| M0120 | Arthritis in Lyme disease                                                            |
| M0121 | Arthritis in Lyme disease                                                            |
| M0122 | Arthritis in Lyme disease                                                            |
| M0123 | Arthritis in Lyme disease                                                            |
| M0124 | Arthritis in Lyme disease                                                            |
| M0125 | Arthritis in Lyme disease                                                            |
| M0126 | Arthritis in Lyme disease                                                            |
| M0127 | Arthritis in Lyme disease                                                            |
| M0128 | Arthritis in Lyme disease                                                            |
| M0129 | Arthritis in Lyme disease                                                            |
| M013  | Arthritis in other bacterial diseases classified elsewhere                           |
| M0130 | Arthritis in other bacterial diseases classified elsewhere                           |
| M0131 | Arthritis in other bacterial diseases classified elsewhere                           |
| M0132 | Arthritis in other bacterial diseases classified elsewhere                           |
| M0133 | Arthritis in other bacterial diseases classified elsewhere                           |
| M0134 | Arthritis in other bacterial diseases classified elsewhere                           |
| M0135 | Arthritis in other bacterial diseases classified elsewhere                           |
| M0136 | Arthritis in other bacterial diseases classified elsewhere                           |
| M0137 | Arthritis in other bacterial diseases classified elsewhere                           |

|       |                                                                           |
|-------|---------------------------------------------------------------------------|
| M0138 | Arthritis in other bacterial diseases classified elsewhere                |
| M0139 | Arthritis in other bacterial diseases classified elsewhere                |
| M014  | Rubella arthritis                                                         |
| M0140 | Rubella arthritis                                                         |
| M0141 | Rubella arthritis                                                         |
| M0142 | Rubella arthritis                                                         |
| M0143 | Rubella arthritis                                                         |
| M0144 | Rubella arthritis                                                         |
| M0145 | Rubella arthritis                                                         |
| M0146 | Rubella arthritis                                                         |
| M0147 | Rubella arthritis                                                         |
| M0148 | Rubella arthritis                                                         |
| M0149 | Rubella arthritis                                                         |
| M015  | Arthritis in other viral diseases classified elsewhere                    |
| M0150 | Arthritis in other viral diseases classified elsewhere                    |
| M0151 | Arthritis in other viral diseases classified elsewhere                    |
| M0152 | Arthritis in other viral diseases classified elsewhere                    |
| M0153 | Arthritis in other viral diseases classified elsewhere                    |
| M0154 | Arthritis in other viral diseases classified elsewhere                    |
| M0155 | Arthritis in other viral diseases classified elsewhere                    |
| M0156 | Arthritis in other viral diseases classified elsewhere                    |
| M0157 | Arthritis in other viral diseases classified elsewhere                    |
| M0158 | Arthritis in other viral diseases classified elsewhere                    |
| M0159 | Arthritis in other viral diseases classified elsewhere                    |
| M016  | Arthritis in mycoses                                                      |
| M0160 | Arthritis in mycoses                                                      |
| M0161 | Arthritis in mycoses                                                      |
| M0162 | Arthritis in mycoses                                                      |
| M0163 | Arthritis in mycoses                                                      |
| M0164 | Arthritis in mycoses                                                      |
| M0165 | Arthritis in mycoses                                                      |
| M0166 | Arthritis in mycoses                                                      |
| M0167 | Arthritis in mycoses                                                      |
| M0168 | Arthritis in mycoses                                                      |
| M0169 | Arthritis in mycoses                                                      |
| M018  | Arthritis in other infectious and parasitic diseases classified elsewhere |
| M0180 | Arthritis in other infectious and parasitic diseases classified elsewhere |
| M0181 | Arthritis in other infectious and parasitic diseases classified elsewhere |
| M0182 | Arthritis in other infectious and parasitic diseases classified elsewhere |
| M0183 | Arthritis in other infectious and parasitic diseases classified elsewhere |
| M0184 | Arthritis in other infectious and parasitic diseases classified elsewhere |
| M0185 | Arthritis in other infectious and parasitic diseases classified elsewhere |
| M0186 | Arthritis in other infectious and parasitic diseases classified elsewhere |
| M0187 | Arthritis in other infectious and parasitic diseases classified elsewhere |
| M0188 | Arthritis in other infectious and parasitic diseases classified elsewhere |
| M0189 | Arthritis in other infectious and parasitic diseases classified elsewhere |
| M02   | Reactive arthropathies                                                    |
| M020  | Arthropathy following intestinal bypass                                   |

|       |                                         |
|-------|-----------------------------------------|
| M0200 | Arthropathy following intestinal bypass |
| M0201 | Arthropathy following intestinal bypass |
| M0202 | Arthropathy following intestinal bypass |
| M0203 | Arthropathy following intestinal bypass |
| M0204 | Arthropathy following intestinal bypass |
| M0205 | Arthropathy following intestinal bypass |
| M0206 | Arthropathy following intestinal bypass |
| M0207 | Arthropathy following intestinal bypass |
| M0208 | Arthropathy following intestinal bypass |
| M0209 | Arthropathy following intestinal bypass |
| M021  | Postdysenteric arthropathy              |
| M0210 | Postdysenteric arthropathy              |
| M0211 | Postdysenteric arthropathy              |
| M0212 | Postdysenteric arthropathy              |
| M0213 | Postdysenteric arthropathy              |
| M0214 | Postdysenteric arthropathy              |
| M0215 | Postdysenteric arthropathy              |
| M0216 | Postdysenteric arthropathy              |
| M0217 | Postdysenteric arthropathy              |
| M0218 | Postdysenteric arthropathy              |
| M0219 | Postdysenteric arthropathy              |
| M022  | Postimmunization arthropathy            |
| M0220 | Postimmunization arthropathy            |
| M0221 | Postimmunization arthropathy            |
| M0222 | Postimmunization arthropathy            |
| M0223 | Postimmunization arthropathy            |
| M0224 | Postimmunization arthropathy            |
| M0225 | Postimmunization arthropathy            |
| M0226 | Postimmunization arthropathy            |
| M0227 | Postimmunization arthropathy            |
| M0228 | Postimmunization arthropathy            |
| M0229 | Postimmunization arthropathy            |
| M023  | Reiter disease                          |
| M023  | Reiter's disease                        |
| M0230 | Reiter disease                          |
| M0230 | Reiter's disease                        |
| M0231 | Reiter disease                          |
| M0231 | Reiter's disease                        |
| M0232 | Reiter disease                          |
| M0232 | Reiter's disease                        |
| M0233 | Reiter disease                          |
| M0233 | Reiter's disease                        |
| M0234 | Reiter disease                          |
| M0234 | Reiter's disease                        |
| M0235 | Reiter disease                          |
| M0235 | Reiter's disease                        |
| M0236 | Reiter disease                          |
| M0236 | Reiter's disease                        |

|       |                                                                           |
|-------|---------------------------------------------------------------------------|
| M0237 | Reiter disease                                                            |
| M0237 | Reiter's disease                                                          |
| M0238 | Reiter disease                                                            |
| M0238 | Reiter's disease                                                          |
| M0239 | Reiter disease                                                            |
| M0239 | Reiter's disease                                                          |
| M028  | Other reactive arthropathies                                              |
| M0280 | Other reactive arthropathies                                              |
| M0281 | Other reactive arthropathies                                              |
| M0282 | Other reactive arthropathies                                              |
| M0283 | Other reactive arthropathies                                              |
| M0284 | Other reactive arthropathies                                              |
| M0285 | Other reactive arthropathies                                              |
| M0286 | Other reactive arthropathies                                              |
| M0287 | Other reactive arthropathies                                              |
| M0288 | Other reactive arthropathies                                              |
| M0289 | Other reactive arthropathies                                              |
| M029  | Reactive arthropathy, unspecified                                         |
| M0290 | Reactive arthropathy, unspecified                                         |
| M0291 | Reactive arthropathy, unspecified                                         |
| M0292 | Reactive arthropathy, unspecified                                         |
| M0293 | Reactive arthropathy, unspecified                                         |
| M0294 | Reactive arthropathy, unspecified                                         |
| M0295 | Reactive arthropathy, unspecified                                         |
| M0296 | Reactive arthropathy, unspecified                                         |
| M0297 | Reactive arthropathy, unspecified                                         |
| M0298 | Reactive arthropathy, unspecified                                         |
| M0299 | Reactive arthropathy, unspecified                                         |
| M03   | Postinfective and reactive arthropathies in diseases classified elsewhere |
| M030  | Postmeningococcal arthritis                                               |
| M0300 | Postmeningococcal arthritis                                               |
| M0301 | Postmeningococcal arthritis                                               |
| M0302 | Postmeningococcal arthritis                                               |
| M0303 | Postmeningococcal arthritis                                               |
| M0304 | Postmeningococcal arthritis                                               |
| M0305 | Postmeningococcal arthritis                                               |
| M0306 | Postmeningococcal arthritis                                               |
| M0307 | Postmeningococcal arthritis                                               |
| M0308 | Postmeningococcal arthritis                                               |
| M0309 | Postmeningococcal arthritis                                               |
| M031  | Postinfective arthropathy in syphilis                                     |
| M0310 | Postinfective arthropathy in syphilis                                     |
| M0311 | Postinfective arthropathy in syphilis                                     |
| M0312 | Postinfective arthropathy in syphilis                                     |
| M0313 | Postinfective arthropathy in syphilis                                     |
| M0314 | Postinfective arthropathy in syphilis                                     |
| M0315 | Postinfective arthropathy in syphilis                                     |
| M0316 | Postinfective arthropathy in syphilis                                     |

|       |                                                                     |
|-------|---------------------------------------------------------------------|
| M0317 | Postinfective arthropathy in syphilis                               |
| M0318 | Postinfective arthropathy in syphilis                               |
| M0319 | Postinfective arthropathy in syphilis                               |
| M032  | Other postinfectious arthropathies in diseases classified elsewhere |
| M0320 | Other postinfectious arthropathies in diseases classified elsewhere |
| M0321 | Other postinfectious arthropathies in diseases classified elsewhere |
| M0322 | Other postinfectious arthropathies in diseases classified elsewhere |
| M0323 | Other postinfectious arthropathies in diseases classified elsewhere |
| M0324 | Other postinfectious arthropathies in diseases classified elsewhere |
| M0325 | Other postinfectious arthropathies in diseases classified elsewhere |
| M0326 | Other postinfectious arthropathies in diseases classified elsewhere |
| M0327 | Other postinfectious arthropathies in diseases classified elsewhere |
| M0328 | Other postinfectious arthropathies in diseases classified elsewhere |
| M0329 | Other postinfectious arthropathies in diseases classified elsewhere |
| M036  | Reactive arthropathy in other diseases classified elsewhere         |
| M0360 | Reactive arthropathy in other diseases classified elsewhere         |
| M0361 | Reactive arthropathy in other diseases classified elsewhere         |
| M0362 | Reactive arthropathy in other diseases classified elsewhere         |
| M0363 | Reactive arthropathy in other diseases classified elsewhere         |
| M0364 | Reactive arthropathy in other diseases classified elsewhere         |
| M0365 | Reactive arthropathy in other diseases classified elsewhere         |
| M0366 | Reactive arthropathy in other diseases classified elsewhere         |
| M0367 | Reactive arthropathy in other diseases classified elsewhere         |
| M0368 | Reactive arthropathy in other diseases classified elsewhere         |
| M0369 | Reactive arthropathy in other diseases classified elsewhere         |
| M05   | Seropositive rheumatoid arthritis                                   |
| M050  | Felty syndrome                                                      |
| M050  | Felty's syndrome                                                    |
| M0500 | Felty syndrome                                                      |
| M0500 | Felty's syndrome                                                    |
| M0501 | Felty syndrome                                                      |
| M0501 | Felty's syndrome                                                    |
| M0502 | Felty syndrome                                                      |
| M0502 | Felty's syndrome                                                    |
| M0503 | Felty syndrome                                                      |
| M0503 | Felty's syndrome                                                    |
| M0504 | Felty syndrome                                                      |
| M0504 | Felty's syndrome                                                    |
| M0505 | Felty syndrome                                                      |
| M0505 | Felty's syndrome                                                    |
| M0506 | Felty syndrome                                                      |
| M0506 | Felty's syndrome                                                    |
| M0507 | Felty syndrome                                                      |
| M0507 | Felty's syndrome                                                    |
| M0508 | Felty syndrome                                                      |
| M0508 | Felty's syndrome                                                    |
| M0509 | Felty syndrome                                                      |
| M0509 | Felty's syndrome                                                    |

|       |                                                                   |
|-------|-------------------------------------------------------------------|
| M051  | Rheumatoid lung disease                                           |
| M0510 | Rheumatoid lung disease                                           |
| M0511 | Rheumatoid lung disease                                           |
| M0512 | Rheumatoid lung disease                                           |
| M0513 | Rheumatoid lung disease                                           |
| M0514 | Rheumatoid lung disease                                           |
| M0515 | Rheumatoid lung disease                                           |
| M0516 | Rheumatoid lung disease                                           |
| M0517 | Rheumatoid lung disease                                           |
| M0518 | Rheumatoid lung disease                                           |
| M0519 | Rheumatoid lung disease                                           |
| M052  | Rheumatoid vasculitis                                             |
| M0520 | Rheumatoid vasculitis                                             |
| M0521 | Rheumatoid vasculitis                                             |
| M0522 | Rheumatoid vasculitis                                             |
| M0523 | Rheumatoid vasculitis                                             |
| M0524 | Rheumatoid vasculitis                                             |
| M0525 | Rheumatoid vasculitis                                             |
| M0526 | Rheumatoid vasculitis                                             |
| M0527 | Rheumatoid vasculitis                                             |
| M0528 | Rheumatoid vasculitis                                             |
| M0529 | Rheumatoid vasculitis                                             |
| M053  | Rheumatoid arthritis with involvement of other organs and systems |
| M0530 | Rheumatoid arthritis with involvement of other organs and systems |
| M0531 | Rheumatoid arthritis with involvement of other organs and systems |
| M0532 | Rheumatoid arthritis with involvement of other organs and systems |
| M0533 | Rheumatoid arthritis with involvement of other organs and systems |
| M0534 | Rheumatoid arthritis with involvement of other organs and systems |
| M0535 | Rheumatoid arthritis with involvement of other organs and systems |
| M0536 | Rheumatoid arthritis with involvement of other organs and systems |
| M0537 | Rheumatoid arthritis with involvement of other organs and systems |
| M0538 | Rheumatoid arthritis with involvement of other organs and systems |
| M0539 | Rheumatoid arthritis with involvement of other organs and systems |
| M058  | Other seropositive rheumatoid arthritis                           |
| M0580 | Other seropositive rheumatoid arthritis                           |
| M0581 | Other seropositive rheumatoid arthritis                           |
| M0582 | Other seropositive rheumatoid arthritis                           |
| M0583 | Other seropositive rheumatoid arthritis                           |
| M0584 | Other seropositive rheumatoid arthritis                           |
| M0585 | Other seropositive rheumatoid arthritis                           |
| M0586 | Other seropositive rheumatoid arthritis                           |
| M0587 | Other seropositive rheumatoid arthritis                           |
| M0588 | Other seropositive rheumatoid arthritis                           |
| M0589 | Other seropositive rheumatoid arthritis                           |
| M059  | Seropositive rheumatoid arthritis, unspecified                    |
| M0590 | Seropositive rheumatoid arthritis, unspecified                    |
| M0591 | Seropositive rheumatoid arthritis, unspecified                    |
| M0592 | Seropositive rheumatoid arthritis, unspecified                    |

|       |                                                |
|-------|------------------------------------------------|
| M0593 | Seropositive rheumatoid arthritis, unspecified |
| M0594 | Seropositive rheumatoid arthritis, unspecified |
| M0595 | Seropositive rheumatoid arthritis, unspecified |
| M0596 | Seropositive rheumatoid arthritis, unspecified |
| M0597 | Seropositive rheumatoid arthritis, unspecified |
| M0598 | Seropositive rheumatoid arthritis, unspecified |
| M0599 | Seropositive rheumatoid arthritis, unspecified |
| M06   | Other rheumatoid arthritis                     |
| M060  | Seronegative rheumatoid arthritis              |
| M0600 | Seronegative rheumatoid arthritis              |
| M0601 | Seronegative rheumatoid arthritis              |
| M0602 | Seronegative rheumatoid arthritis              |
| M0603 | Seronegative rheumatoid arthritis              |
| M0604 | Seronegative rheumatoid arthritis              |
| M0605 | Seronegative rheumatoid arthritis              |
| M0606 | Seronegative rheumatoid arthritis              |
| M0607 | Seronegative rheumatoid arthritis              |
| M0608 | Seronegative rheumatoid arthritis              |
| M0609 | Seronegative rheumatoid arthritis              |
| M061  | Adult-onset Still disease                      |
| M061  | Adult-onset Still's disease                    |
| M0610 | Adult-onset Still disease                      |
| M0610 | Adult-onset Still's disease                    |
| M0611 | Adult-onset Still disease                      |
| M0611 | Adult-onset Still's disease                    |
| M0612 | Adult-onset Still disease                      |
| M0612 | Adult-onset Still's disease                    |
| M0613 | Adult-onset Still disease                      |
| M0613 | Adult-onset Still's disease                    |
| M0614 | Adult-onset Still disease                      |
| M0614 | Adult-onset Still's disease                    |
| M0615 | Adult-onset Still disease                      |
| M0615 | Adult-onset Still's disease                    |
| M0616 | Adult-onset Still disease                      |
| M0616 | Adult-onset Still's disease                    |
| M0617 | Adult-onset Still disease                      |
| M0617 | Adult-onset Still's disease                    |
| M0618 | Adult-onset Still disease                      |
| M0618 | Adult-onset Still's disease                    |
| M0619 | Adult-onset Still disease                      |
| M0619 | Adult-onset Still's disease                    |
| M062  | Rheumatoid bursitis                            |
| M0620 | Rheumatoid bursitis                            |
| M0621 | Rheumatoid bursitis                            |
| M0622 | Rheumatoid bursitis                            |
| M0623 | Rheumatoid bursitis                            |
| M0624 | Rheumatoid bursitis                            |
| M0625 | Rheumatoid bursitis                            |



|       |                                      |
|-------|--------------------------------------|
| M0626 | Rheumatoid bursitis                  |
| M0627 | Rheumatoid bursitis                  |
| M0628 | Rheumatoid bursitis                  |
| M0629 | Rheumatoid bursitis                  |
| M063  | Rheumatoid nodule                    |
| M0630 | Rheumatoid nodule                    |
| M0631 | Rheumatoid nodule                    |
| M0632 | Rheumatoid nodule                    |
| M0633 | Rheumatoid nodule                    |
| M0634 | Rheumatoid nodule                    |
| M0635 | Rheumatoid nodule                    |
| M0636 | Rheumatoid nodule                    |
| M0637 | Rheumatoid nodule                    |
| M0638 | Rheumatoid nodule                    |
| M0639 | Rheumatoid nodule                    |
| M064  | Inflammatory polyarthropathy         |
| M0640 | Inflammatory polyarthropathy         |
| M0641 | Inflammatory polyarthropathy         |
| M0642 | Inflammatory polyarthropathy         |
| M0643 | Inflammatory polyarthropathy         |
| M0644 | Inflammatory polyarthropathy         |
| M0645 | Inflammatory polyarthropathy         |
| M0646 | Inflammatory polyarthropathy         |
| M0647 | Inflammatory polyarthropathy         |
| M0648 | Inflammatory polyarthropathy         |
| M0649 | Inflammatory polyarthropathy         |
| M068  | Other specified rheumatoid arthritis |
| M0680 | Other specified rheumatoid arthritis |
| M0681 | Other specified rheumatoid arthritis |
| M0682 | Other specified rheumatoid arthritis |
| M0683 | Other specified rheumatoid arthritis |
| M0684 | Other specified rheumatoid arthritis |
| M0685 | Other specified rheumatoid arthritis |
| M0686 | Other specified rheumatoid arthritis |
| M0687 | Other specified rheumatoid arthritis |
| M0688 | Other specified rheumatoid arthritis |
| M0689 | Other specified rheumatoid arthritis |
| M069  | Rheumatoid arthritis, unspecified    |
| M0690 | Rheumatoid arthritis, unspecified    |
| M0691 | Rheumatoid arthritis, unspecified    |
| M0692 | Rheumatoid arthritis, unspecified    |
| M0693 | Rheumatoid arthritis, unspecified    |
| M0694 | Rheumatoid arthritis, unspecified    |
| M0695 | Rheumatoid arthritis, unspecified    |
| M0696 | Rheumatoid arthritis, unspecified    |
| M0697 | Rheumatoid arthritis, unspecified    |
| M0698 | Rheumatoid arthritis, unspecified    |
| M0699 | Rheumatoid arthritis, unspecified    |

|       |                                                     |
|-------|-----------------------------------------------------|
| M07   | Psoriatic and enteropathic arthropathies            |
| M070  | Distal interphalangeal psoriatic arthropathy        |
| M0700 | Distal interphalangeal psoriatic arthropathy        |
| M0704 | Distal interphalangeal psoriatic arthropathy        |
| M0707 | Distal interphalangeal psoriatic arthropathy        |
| M0709 | Distal interphalangeal psoriatic arthropathy        |
| M071  | Arthritis mutilans                                  |
| M0710 | Arthritis mutilans                                  |
| M0711 | Arthritis mutilans                                  |
| M0712 | Arthritis mutilans                                  |
| M0713 | Arthritis mutilans                                  |
| M0714 | Arthritis mutilans                                  |
| M0715 | Arthritis mutilans                                  |
| M0716 | Arthritis mutilans                                  |
| M0717 | Arthritis mutilans                                  |
| M0718 | Arthritis mutilans                                  |
| M0719 | Arthritis mutilans                                  |
| M072  | Psoriatic spondylitis                               |
| M0720 | Psoriatic spondylitis                               |
| M0721 | Psoriatic spondylitis                               |
| M0722 | Psoriatic spondylitis                               |
| M0723 | Psoriatic spondylitis                               |
| M0724 | Psoriatic spondylitis                               |
| M0725 | Psoriatic spondylitis                               |
| M0726 | Psoriatic spondylitis                               |
| M0727 | Psoriatic spondylitis                               |
| M0728 | Psoriatic spondylitis                               |
| M0729 | Psoriatic spondylitis                               |
| M073  | Other psoriatic arthropathies                       |
| M0730 | Other psoriatic arthropathies                       |
| M0731 | Other psoriatic arthropathies                       |
| M0732 | Other psoriatic arthropathies                       |
| M0733 | Other psoriatic arthropathies                       |
| M0734 | Other psoriatic arthropathies                       |
| M0735 | Other psoriatic arthropathies                       |
| M0736 | Other psoriatic arthropathies                       |
| M0737 | Other psoriatic arthropathies                       |
| M0738 | Other psoriatic arthropathies                       |
| M0739 | Other psoriatic arthropathies                       |
| M074  | Arthropathy in Crohn disease [regional enteritis]   |
| M074  | Arthropathy in Crohn's disease [regional enteritis] |
| M0740 | Arthropathy in Crohn disease [regional enteritis]   |
| M0740 | Arthropathy in Crohn's disease [regional enteritis] |
| M0741 | Arthropathy in Crohn disease [regional enteritis]   |
| M0741 | Arthropathy in Crohn's disease [regional enteritis] |
| M0742 | Arthropathy in Crohn disease [regional enteritis]   |
| M0742 | Arthropathy in Crohn's disease [regional enteritis] |
| M0743 | Arthropathy in Crohn disease [regional enteritis]   |

|       |                                                     |
|-------|-----------------------------------------------------|
| M0743 | Arthropathy in Crohn's disease [regional enteritis] |
| M0744 | Arthropathy in Crohn disease [regional enteritis]   |
| M0744 | Arthropathy in Crohn's disease [regional enteritis] |
| M0745 | Arthropathy in Crohn disease [regional enteritis]   |
| M0745 | Arthropathy in Crohn's disease [regional enteritis] |
| M0746 | Arthropathy in Crohn disease [regional enteritis]   |
| M0746 | Arthropathy in Crohn's disease [regional enteritis] |
| M0747 | Arthropathy in Crohn disease [regional enteritis]   |
| M0747 | Arthropathy in Crohn's disease [regional enteritis] |
| M0748 | Arthropathy in Crohn disease [regional enteritis]   |
| M0748 | Arthropathy in Crohn's disease [regional enteritis] |
| M0749 | Arthropathy in Crohn disease [regional enteritis]   |
| M0749 | Arthropathy in Crohn's disease [regional enteritis] |
| M075  | Arthropathy in ulcerative colitis                   |
| M0750 | Arthropathy in ulcerative colitis                   |
| M0751 | Arthropathy in ulcerative colitis                   |
| M0752 | Arthropathy in ulcerative colitis                   |
| M0753 | Arthropathy in ulcerative colitis                   |
| M0754 | Arthropathy in ulcerative colitis                   |
| M0755 | Arthropathy in ulcerative colitis                   |
| M0756 | Arthropathy in ulcerative colitis                   |
| M0757 | Arthropathy in ulcerative colitis                   |
| M0758 | Arthropathy in ulcerative colitis                   |
| M0759 | Arthropathy in ulcerative colitis                   |
| M076  | Other enteropathic arthropathies                    |
| M0760 | Other enteropathic arthropathies                    |
| M0761 | Other enteropathic arthropathies                    |
| M0762 | Other enteropathic arthropathies                    |
| M0763 | Other enteropathic arthropathies                    |
| M0764 | Other enteropathic arthropathies                    |
| M0765 | Other enteropathic arthropathies                    |
| M0766 | Other enteropathic arthropathies                    |
| M0767 | Other enteropathic arthropathies                    |
| M0768 | Other enteropathic arthropathies                    |
| M0769 | Other enteropathic arthropathies                    |
| M08   | Juvenile arthritis                                  |
| M080  | Juvenile rheumatoid arthritis                       |
| M0800 | Juvenile rheumatoid arthritis                       |
| M0801 | Juvenile rheumatoid arthritis                       |
| M0802 | Juvenile rheumatoid arthritis                       |
| M0803 | Juvenile rheumatoid arthritis                       |
| M0804 | Juvenile rheumatoid arthritis                       |
| M0805 | Juvenile rheumatoid arthritis                       |
| M0806 | Juvenile rheumatoid arthritis                       |
| M0807 | Juvenile rheumatoid arthritis                       |
| M0808 | Juvenile rheumatoid arthritis                       |
| M0809 | Juvenile rheumatoid arthritis                       |
| M081  | Juvenile ankylosing spondylitis                     |

|       |                                        |
|-------|----------------------------------------|
| M0810 | Juvenile ankylosing spondylitis        |
| M0811 | Juvenile ankylosing spondylitis        |
| M0812 | Juvenile ankylosing spondylitis        |
| M0813 | Juvenile ankylosing spondylitis        |
| M0814 | Juvenile ankylosing spondylitis        |
| M0815 | Juvenile ankylosing spondylitis        |
| M0816 | Juvenile ankylosing spondylitis        |
| M0817 | Juvenile ankylosing spondylitis        |
| M0818 | Juvenile ankylosing spondylitis        |
| M0819 | Juvenile ankylosing spondylitis        |
| M082  | Juvenile arthritis with systemic onset |
| M0820 | Juvenile arthritis with systemic onset |
| M0821 | Juvenile arthritis with systemic onset |
| M0822 | Juvenile arthritis with systemic onset |
| M0823 | Juvenile arthritis with systemic onset |
| M0824 | Juvenile arthritis with systemic onset |
| M0825 | Juvenile arthritis with systemic onset |
| M0826 | Juvenile arthritis with systemic onset |
| M0827 | Juvenile arthritis with systemic onset |
| M0828 | Juvenile arthritis with systemic onset |
| M0829 | Juvenile arthritis with systemic onset |
| M083  | Juvenile polyarthritis (seronegative)  |
| M0830 | Juvenile polyarthritis (seronegative)  |
| M0831 | Juvenile polyarthritis (seronegative)  |
| M0832 | Juvenile polyarthritis (seronegative)  |
| M0833 | Juvenile polyarthritis (seronegative)  |
| M0834 | Juvenile polyarthritis (seronegative)  |
| M0835 | Juvenile polyarthritis (seronegative)  |
| M0836 | Juvenile polyarthritis (seronegative)  |
| M0837 | Juvenile polyarthritis (seronegative)  |
| M0838 | Juvenile polyarthritis (seronegative)  |
| M0839 | Juvenile polyarthritis (seronegative)  |
| M084  | Pauciarticular juvenile arthritis      |
| M0840 | Pauciarticular juvenile arthritis      |
| M0841 | Pauciarticular juvenile arthritis      |
| M0842 | Pauciarticular juvenile arthritis      |
| M0843 | Pauciarticular juvenile arthritis      |
| M0844 | Pauciarticular juvenile arthritis      |
| M0845 | Pauciarticular juvenile arthritis      |
| M0846 | Pauciarticular juvenile arthritis      |
| M0847 | Pauciarticular juvenile arthritis      |
| M0848 | Pauciarticular juvenile arthritis      |
| M0849 | Pauciarticular juvenile arthritis      |
| M088  | Other juvenile arthritis               |
| M0880 | Other juvenile arthritis               |
| M0881 | Other juvenile arthritis               |
| M0882 | Other juvenile arthritis               |
| M0883 | Other juvenile arthritis               |

|       |                                                            |
|-------|------------------------------------------------------------|
| M0884 | Other juvenile arthritis                                   |
| M0885 | Other juvenile arthritis                                   |
| M0886 | Other juvenile arthritis                                   |
| M0887 | Other juvenile arthritis                                   |
| M0888 | Other juvenile arthritis                                   |
| M0889 | Other juvenile arthritis                                   |
| M089  | Juvenile arthritis, unspecified                            |
| M0890 | Juvenile arthritis, unspecified                            |
| M0891 | Juvenile arthritis, unspecified                            |
| M0892 | Juvenile arthritis, unspecified                            |
| M0893 | Juvenile arthritis, unspecified                            |
| M0894 | Juvenile arthritis, unspecified                            |
| M0895 | Juvenile arthritis, unspecified                            |
| M0896 | Juvenile arthritis, unspecified                            |
| M0897 | Juvenile arthritis, unspecified                            |
| M0898 | Juvenile arthritis, unspecified                            |
| M0899 | Juvenile arthritis, unspecified                            |
| M09   | Juvenile arthritis in diseases classified elsewhere        |
| M090  | Juvenile arthritis in psoriasis                            |
| M0900 | Juvenile arthritis in psoriasis                            |
| M0901 | Juvenile arthritis in psoriasis                            |
| M0902 | Juvenile arthritis in psoriasis                            |
| M0903 | Juvenile arthritis in psoriasis                            |
| M0904 | Juvenile arthritis in psoriasis                            |
| M0905 | Juvenile arthritis in psoriasis                            |
| M0906 | Juvenile arthritis in psoriasis                            |
| M0907 | Juvenile arthritis in psoriasis                            |
| M0908 | Juvenile arthritis in psoriasis                            |
| M0909 | Juvenile arthritis in psoriasis                            |
| M091  | Juvenile arthritis in Crohn disease [regional enteritis]   |
| M091  | Juvenile arthritis in Crohn's disease [regional enteritis] |
| M0910 | Juvenile arthritis in Crohn disease [regional enteritis]   |
| M0910 | Juvenile arthritis in Crohn's disease [regional enteritis] |
| M0911 | Juvenile arthritis in Crohn disease [regional enteritis]   |
| M0911 | Juvenile arthritis in Crohn's disease [regional enteritis] |
| M0912 | Juvenile arthritis in Crohn disease [regional enteritis]   |
| M0912 | Juvenile arthritis in Crohn's disease [regional enteritis] |
| M0913 | Juvenile arthritis in Crohn disease [regional enteritis]   |
| M0913 | Juvenile arthritis in Crohn's disease [regional enteritis] |
| M0914 | Juvenile arthritis in Crohn disease [regional enteritis]   |
| M0914 | Juvenile arthritis in Crohn's disease [regional enteritis] |
| M0915 | Juvenile arthritis in Crohn disease [regional enteritis]   |
| M0915 | Juvenile arthritis in Crohn's disease [regional enteritis] |
| M0916 | Juvenile arthritis in Crohn disease [regional enteritis]   |
| M0916 | Juvenile arthritis in Crohn's disease [regional enteritis] |
| M0917 | Juvenile arthritis in Crohn disease [regional enteritis]   |
| M0917 | Juvenile arthritis in Crohn's disease [regional enteritis] |
| M0918 | Juvenile arthritis in Crohn disease [regional enteritis]   |

|       |                                                            |
|-------|------------------------------------------------------------|
| M0918 | Juvenile arthritis in Crohn's disease [regional enteritis] |
| M0919 | Juvenile arthritis in Crohn disease [regional enteritis]   |
| M0919 | Juvenile arthritis in Crohn's disease [regional enteritis] |
| M092  | Juvenile arthritis in ulcerative colitis                   |
| M0920 | Juvenile arthritis in ulcerative colitis                   |
| M0921 | Juvenile arthritis in ulcerative colitis                   |
| M0922 | Juvenile arthritis in ulcerative colitis                   |
| M0923 | Juvenile arthritis in ulcerative colitis                   |
| M0924 | Juvenile arthritis in ulcerative colitis                   |
| M0925 | Juvenile arthritis in ulcerative colitis                   |
| M0926 | Juvenile arthritis in ulcerative colitis                   |
| M0927 | Juvenile arthritis in ulcerative colitis                   |
| M0928 | Juvenile arthritis in ulcerative colitis                   |
| M0929 | Juvenile arthritis in ulcerative colitis                   |
| M098  | Juvenile arthritis in other diseases classified elsewhere  |
| M0980 | Juvenile arthritis in other diseases classified elsewhere  |
| M0981 | Juvenile arthritis in other diseases classified elsewhere  |
| M0982 | Juvenile arthritis in other diseases classified elsewhere  |
| M0983 | Juvenile arthritis in other diseases classified elsewhere  |
| M0984 | Juvenile arthritis in other diseases classified elsewhere  |
| M0985 | Juvenile arthritis in other diseases classified elsewhere  |
| M0986 | Juvenile arthritis in other diseases classified elsewhere  |
| M0987 | Juvenile arthritis in other diseases classified elsewhere  |
| M0988 | Juvenile arthritis in other diseases classified elsewhere  |
| M0989 | Juvenile arthritis in other diseases classified elsewhere  |
| M10   | Gout                                                       |
| M100  | Idiopathic gout                                            |
| M1000 | Idiopathic gout                                            |
| M1001 | Idiopathic gout                                            |
| M1002 | Idiopathic gout                                            |
| M1003 | Idiopathic gout                                            |
| M1004 | Idiopathic gout                                            |
| M1005 | Idiopathic gout                                            |
| M1006 | Idiopathic gout                                            |
| M1007 | Idiopathic gout                                            |
| M1008 | Idiopathic gout                                            |
| M1009 | Idiopathic gout                                            |
| M101  | Lead-induced gout                                          |
| M1010 | Lead-induced gout                                          |
| M1011 | Lead-induced gout                                          |
| M1012 | Lead-induced gout                                          |
| M1013 | Lead-induced gout                                          |
| M1014 | Lead-induced gout                                          |
| M1015 | Lead-induced gout                                          |
| M1016 | Lead-induced gout                                          |
| M1017 | Lead-induced gout                                          |
| M1018 | Lead-induced gout                                          |
| M1019 | Lead-induced gout                                          |

|       |                                          |
|-------|------------------------------------------|
| M102  | Drug-induced gout                        |
| M1020 | Drug-induced gout                        |
| M1021 | Drug-induced gout                        |
| M1022 | Drug-induced gout                        |
| M1023 | Drug-induced gout                        |
| M1024 | Drug-induced gout                        |
| M1025 | Drug-induced gout                        |
| M1026 | Drug-induced gout                        |
| M1027 | Drug-induced gout                        |
| M1028 | Drug-induced gout                        |
| M1029 | Drug-induced gout                        |
| M103  | Gout due to impairment of renal function |
| M1030 | Gout due to impairment of renal function |
| M1031 | Gout due to impairment of renal function |
| M1032 | Gout due to impairment of renal function |
| M1033 | Gout due to impairment of renal function |
| M1034 | Gout due to impairment of renal function |
| M1035 | Gout due to impairment of renal function |
| M1036 | Gout due to impairment of renal function |
| M1037 | Gout due to impairment of renal function |
| M1038 | Gout due to impairment of renal function |
| M1039 | Gout due to impairment of renal function |
| M104  | Other secondary gout                     |
| M1040 | Other secondary gout                     |
| M1041 | Other secondary gout                     |
| M1042 | Other secondary gout                     |
| M1043 | Other secondary gout                     |
| M1044 | Other secondary gout                     |
| M1045 | Other secondary gout                     |
| M1046 | Other secondary gout                     |
| M1047 | Other secondary gout                     |
| M1048 | Other secondary gout                     |
| M1049 | Other secondary gout                     |
| M109  | Gout, unspecified                        |
| M1090 | Gout, unspecified                        |
| M1091 | Gout, unspecified                        |
| M1092 | Gout, unspecified                        |
| M1093 | Gout, unspecified                        |
| M1094 | Gout, unspecified                        |
| M1095 | Gout, unspecified                        |
| M1096 | Gout, unspecified                        |
| M1097 | Gout, unspecified                        |
| M1098 | Gout, unspecified                        |
| M1099 | Gout, unspecified                        |
| M11   | Other crystal arthropathies              |
| M110  | Hydroxyapatite deposition disease        |
| M1100 | Hydroxyapatite deposition disease        |
| M1101 | Hydroxyapatite deposition disease        |

|       |                                       |
|-------|---------------------------------------|
| M1102 | Hydroxyapatite deposition disease     |
| M1103 | Hydroxyapatite deposition disease     |
| M1104 | Hydroxyapatite deposition disease     |
| M1105 | Hydroxyapatite deposition disease     |
| M1106 | Hydroxyapatite deposition disease     |
| M1107 | Hydroxyapatite deposition disease     |
| M1108 | Hydroxyapatite deposition disease     |
| M1109 | Hydroxyapatite deposition disease     |
| M111  | Familial chondrocalcinosis            |
| M1110 | Familial chondrocalcinosis            |
| M1111 | Familial chondrocalcinosis            |
| M1112 | Familial chondrocalcinosis            |
| M1113 | Familial chondrocalcinosis            |
| M1114 | Familial chondrocalcinosis            |
| M1115 | Familial chondrocalcinosis            |
| M1116 | Familial chondrocalcinosis            |
| M1117 | Familial chondrocalcinosis            |
| M1118 | Familial chondrocalcinosis            |
| M1119 | Familial chondrocalcinosis            |
| M112  | Other chondrocalcinosis               |
| M1120 | Other chondrocalcinosis               |
| M1121 | Other chondrocalcinosis               |
| M1122 | Other chondrocalcinosis               |
| M1123 | Other chondrocalcinosis               |
| M1124 | Other chondrocalcinosis               |
| M1125 | Other chondrocalcinosis               |
| M1126 | Other chondrocalcinosis               |
| M1127 | Other chondrocalcinosis               |
| M1128 | Other chondrocalcinosis               |
| M1129 | Other chondrocalcinosis               |
| M118  | Other specified crystal arthropathies |
| M1180 | Other specified crystal arthropathies |
| M1181 | Other specified crystal arthropathies |
| M1182 | Other specified crystal arthropathies |
| M1183 | Other specified crystal arthropathies |
| M1184 | Other specified crystal arthropathies |
| M1185 | Other specified crystal arthropathies |
| M1186 | Other specified crystal arthropathies |
| M1187 | Other specified crystal arthropathies |
| M1188 | Other specified crystal arthropathies |
| M1189 | Other specified crystal arthropathies |
| M119  | Crystal arthropathy, unspecified      |
| M1190 | Crystal arthropathy, unspecified      |
| M1191 | Crystal arthropathy, unspecified      |
| M1192 | Crystal arthropathy, unspecified      |
| M1193 | Crystal arthropathy, unspecified      |
| M1194 | Crystal arthropathy, unspecified      |
| M1195 | Crystal arthropathy, unspecified      |



|       |                                             |
|-------|---------------------------------------------|
| M1196 | Crystal arthropathy, unspecified            |
| M1197 | Crystal arthropathy, unspecified            |
| M1198 | Crystal arthropathy, unspecified            |
| M1199 | Crystal arthropathy, unspecified            |
| M12   | Other specific arthropathies                |
| M120  | Chronic postrheumatic arthropathy [Jaccoud] |
| M1200 | Chronic postrheumatic arthropathy [Jaccoud] |
| M1201 | Chronic postrheumatic arthropathy [Jaccoud] |
| M1202 | Chronic postrheumatic arthropathy [Jaccoud] |
| M1203 | Chronic postrheumatic arthropathy [Jaccoud] |
| M1204 | Chronic postrheumatic arthropathy [Jaccoud] |
| M1205 | Chronic postrheumatic arthropathy [Jaccoud] |
| M1206 | Chronic postrheumatic arthropathy [Jaccoud] |
| M1207 | Chronic postrheumatic arthropathy [Jaccoud] |
| M1208 | Chronic postrheumatic arthropathy [Jaccoud] |
| M1209 | Chronic postrheumatic arthropathy [Jaccoud] |
| M121  | Kaschin-Beck disease                        |
| M1210 | Kaschin-Beck disease                        |
| M1211 | Kaschin-Beck disease                        |
| M1212 | Kaschin-Beck disease                        |
| M1213 | Kaschin-Beck disease                        |
| M1214 | Kaschin-Beck disease                        |
| M1215 | Kaschin-Beck disease                        |
| M1216 | Kaschin-Beck disease                        |
| M1217 | Kaschin-Beck disease                        |
| M1218 | Kaschin-Beck disease                        |
| M1219 | Kaschin-Beck disease                        |
| M122  | Villonodular synovitis (pigmented)          |
| M1220 | Villonodular synovitis (pigmented)          |
| M1221 | Villonodular synovitis (pigmented)          |
| M1222 | Villonodular synovitis (pigmented)          |
| M1223 | Villonodular synovitis (pigmented)          |
| M1224 | Villonodular synovitis (pigmented)          |
| M1225 | Villonodular synovitis (pigmented)          |
| M1226 | Villonodular synovitis (pigmented)          |
| M1227 | Villonodular synovitis (pigmented)          |
| M1228 | Villonodular synovitis (pigmented)          |
| M1229 | Villonodular synovitis (pigmented)          |
| M123  | Palindromic rheumatism                      |
| M1230 | Palindromic rheumatism                      |
| M1231 | Palindromic rheumatism                      |
| M1232 | Palindromic rheumatism                      |
| M1233 | Palindromic rheumatism                      |
| M1234 | Palindromic rheumatism                      |
| M1235 | Palindromic rheumatism                      |
| M1236 | Palindromic rheumatism                      |
| M1237 | Palindromic rheumatism                      |
| M1238 | Palindromic rheumatism                      |

|       |                                                        |
|-------|--------------------------------------------------------|
| M1239 | Palindromic rheumatism                                 |
| M124  | Intermittent hydrarthrosis                             |
| M1240 | Intermittent hydrarthrosis                             |
| M1241 | Intermittent hydrarthrosis                             |
| M1242 | Intermittent hydrarthrosis                             |
| M1243 | Intermittent hydrarthrosis                             |
| M1244 | Intermittent hydrarthrosis                             |
| M1245 | Intermittent hydrarthrosis                             |
| M1246 | Intermittent hydrarthrosis                             |
| M1247 | Intermittent hydrarthrosis                             |
| M1248 | Intermittent hydrarthrosis                             |
| M1249 | Intermittent hydrarthrosis                             |
| M125  | Traumatic arthropathy                                  |
| M1250 | Traumatic arthropathy                                  |
| M1251 | Traumatic arthropathy                                  |
| M1252 | Traumatic arthropathy                                  |
| M1253 | Traumatic arthropathy                                  |
| M1254 | Traumatic arthropathy                                  |
| M1255 | Traumatic arthropathy                                  |
| M1256 | Traumatic arthropathy                                  |
| M1257 | Traumatic arthropathy                                  |
| M1258 | Traumatic arthropathy                                  |
| M1259 | Traumatic arthropathy                                  |
| M128  | Other specific arthropathies, not elsewhere classified |
| M1280 | Other specific arthropathies, not elsewhere classified |
| M1281 | Other specific arthropathies, not elsewhere classified |
| M1282 | Other specific arthropathies, not elsewhere classified |
| M1283 | Other specific arthropathies, not elsewhere classified |
| M1284 | Other specific arthropathies, not elsewhere classified |
| M1285 | Other specific arthropathies, not elsewhere classified |
| M1286 | Other specific arthropathies, not elsewhere classified |
| M1287 | Other specific arthropathies, not elsewhere classified |
| M1288 | Other specific arthropathies, not elsewhere classified |
| M1289 | Other specific arthropathies, not elsewhere classified |
| M13   | Other arthritis                                        |
| M130  | Polyarthritis, unspecified                             |
| M1300 | Polyarthritis, unspecified                             |
| M1301 | Polyarthritis, unspecified                             |
| M1302 | Polyarthritis, unspecified                             |
| M1303 | Polyarthritis, unspecified                             |
| M1304 | Polyarthritis, unspecified                             |
| M1305 | Polyarthritis, unspecified                             |
| M1306 | Polyarthritis, unspecified                             |
| M1307 | Polyarthritis, unspecified                             |
| M1308 | Polyarthritis, unspecified                             |
| M1309 | Polyarthritis, unspecified                             |
| M131  | Monoarthritis, not elsewhere classified                |
| M1310 | Monoarthritis, not elsewhere classified                |

|       |                                                                       |
|-------|-----------------------------------------------------------------------|
| M1311 | Monoarthritis, not elsewhere classified                               |
| M1312 | Monoarthritis, not elsewhere classified                               |
| M1313 | Monoarthritis, not elsewhere classified                               |
| M1314 | Monoarthritis, not elsewhere classified                               |
| M1315 | Monoarthritis, not elsewhere classified                               |
| M1316 | Monoarthritis, not elsewhere classified                               |
| M1317 | Monoarthritis, not elsewhere classified                               |
| M1318 | Monoarthritis, not elsewhere classified                               |
| M1319 | Monoarthritis, not elsewhere classified                               |
| M138  | Other specified arthritis                                             |
| M1380 | Other specified arthritis                                             |
| M1381 | Other specified arthritis                                             |
| M1382 | Other specified arthritis                                             |
| M1383 | Other specified arthritis                                             |
| M1384 | Other specified arthritis                                             |
| M1385 | Other specified arthritis                                             |
| M1386 | Other specified arthritis                                             |
| M1387 | Other specified arthritis                                             |
| M1388 | Other specified arthritis                                             |
| M1389 | Other specified arthritis                                             |
| M139  | Arthritis, unspecified                                                |
| M1390 | Arthritis, unspecified                                                |
| M1391 | Arthritis, unspecified                                                |
| M1392 | Arthritis, unspecified                                                |
| M1393 | Arthritis, unspecified                                                |
| M1394 | Arthritis, unspecified                                                |
| M1395 | Arthritis, unspecified                                                |
| M1396 | Arthritis, unspecified                                                |
| M1397 | Arthritis, unspecified                                                |
| M1398 | Arthritis, unspecified                                                |
| M1399 | Arthritis, unspecified                                                |
| M14   | Arthropathies in other diseases classified elsewhere                  |
| M140  | Gouty arthropathy due to enzyme defects and other inherited disorders |
| M141  | Crystal arthropathy in other metabolic disorders                      |
| M142  | Diabetic arthropathy                                                  |
| M143  | Lipoid dermatoarthritis                                               |
| M144  | Arthropathy in amyloidosis                                            |
| M145  | Arthropathies in other endocrine, nutritional and metabolic disorders |
| M146  | Neuropathic arthropathy                                               |
| M148  | Arthropathies in other specified diseases classified elsewhere        |
| M15   | Polyarthrosis                                                         |
| M150  | Primary generalized (osteo)arthrosis                                  |
| M151  | Heberden nodes (with arthropathy)                                     |
| M151  | Heberden's nodes (with arthropathy)                                   |
| M152  | Bouchard nodes (with arthropathy)                                     |
| M152  | Bouchard's nodes (with arthropathy)                                   |
| M153  | Secondary multiple arthrosis                                          |
| M154  | Erosive (osteo)arthrosis                                              |

|       |                                                                      |
|-------|----------------------------------------------------------------------|
| M158  | Other polyarthrosis                                                  |
| M159  | Polyarthrosis, unspecified                                           |
| M16   | Coxarthrosis [arthrosis of hip]                                      |
| M160  | Primary coxarthrosis, bilateral                                      |
| M161  | Other primary coxarthrosis                                           |
| M162  | Coxarthrosis resulting from dysplasia, bilateral                     |
| M163  | Other dysplastic coxarthrosis                                        |
| M164  | Post-traumatic coxarthrosis, bilateral                               |
| M165  | Other post-traumatic coxarthrosis                                    |
| M166  | Other secondary coxarthrosis, bilateral                              |
| M167  | Other secondary coxarthrosis                                         |
| M169  | Coxarthrosis, unspecified                                            |
| M17   | Gonarthrosis [arthrosis of knee]                                     |
| M170  | Primary gonarthrosis, bilateral                                      |
| M171  | Other primary gonarthrosis                                           |
| M172  | Post-traumatic gonarthrosis, bilateral                               |
| M173  | Other post-traumatic gonarthrosis                                    |
| M174  | Other secondary gonarthrosis, bilateral                              |
| M175  | Other secondary gonarthrosis                                         |
| M179  | Gonarthrosis, unspecified                                            |
| M18   | Arthrosis of first carpometacarpal joint                             |
| M180  | Primary arthrosis of first carpometacarpal joints, bilateral         |
| M181  | Other primary arthrosis of first carpometacarpal joint               |
| M182  | Post-traumatic arthrosis of first carpometacarpal joints, bilateral  |
| M183  | Other post-traumatic arthrosis of first carpometacarpal joint        |
| M184  | Other secondary arthrosis of first carpometacarpal joints, bilateral |
| M185  | Other secondary arthrosis of first carpometacarpal joint             |
| M189  | Arthrosis of first carpometacarpal joint, unspecified                |
| M19   | Other arthrosis                                                      |
| M190  | Primary arthrosis of other joints                                    |
| M1900 | Primary arthrosis of other joints                                    |
| M1901 | Primary arthrosis of other joints                                    |
| M1902 | Primary arthrosis of other joints                                    |
| M1903 | Primary arthrosis of other joints                                    |
| M1904 | Primary arthrosis of other joints                                    |
| M1905 | Primary arthrosis of other joints                                    |
| M1907 | Primary arthrosis of other joints                                    |
| M1908 | Primary arthrosis of other joints                                    |
| M1909 | Primary arthrosis of other joints                                    |
| M191  | Post-traumatic arthrosis of other joints                             |
| M1910 | Post-traumatic arthrosis of other joints                             |
| M1911 | Post-traumatic arthrosis of other joints                             |
| M1912 | Post-traumatic arthrosis of other joints                             |
| M1913 | Post-traumatic arthrosis of other joints                             |
| M1914 | Post-traumatic arthrosis of other joints                             |
| M1915 | Post-traumatic arthrosis of other joints                             |
| M1917 | Post-traumatic arthrosis of other joints                             |
| M1918 | Post-traumatic arthrosis of other joints                             |

|       |                                            |
|-------|--------------------------------------------|
| M1919 | Post-traumatic arthrosis of other joints   |
| M192  | Other secondary arthrosis                  |
| M1920 | Other secondary arthrosis                  |
| M1921 | Other secondary arthrosis                  |
| M1922 | Other secondary arthrosis                  |
| M1923 | Other secondary arthrosis                  |
| M1924 | Other secondary arthrosis                  |
| M1925 | Other secondary arthrosis                  |
| M1927 | Other secondary arthrosis                  |
| M1928 | Other secondary arthrosis                  |
| M1929 | Other secondary arthrosis                  |
| M198  | Other specified arthrosis                  |
| M1980 | Other specified arthrosis                  |
| M1981 | Other specified arthrosis                  |
| M1982 | Other specified arthrosis                  |
| M1983 | Other specified arthrosis                  |
| M1984 | Other specified arthrosis                  |
| M1985 | Other specified arthrosis                  |
| M1986 | Other specified arthrosis                  |
| M1987 | Other specified arthrosis                  |
| M1988 | Other specified arthrosis                  |
| M1989 | Other specified arthrosis                  |
| M199  | Arthrosis, unspecified                     |
| M1990 | Arthrosis, unspecified                     |
| M1991 | Arthrosis, unspecified                     |
| M1992 | Arthrosis, unspecified                     |
| M1993 | Arthrosis, unspecified                     |
| M1994 | Arthrosis, unspecified                     |
| M1995 | Arthrosis, unspecified                     |
| M1997 | Arthrosis, unspecified                     |
| M1998 | Arthrosis, unspecified                     |
| M1999 | Arthrosis, unspecified                     |
| M20   | Acquired deformities of fingers and toes   |
| M200  | Deformity of finger(s)                     |
| M201  | Hallux valgus (acquired)                   |
| M202  | Hallux rigidus                             |
| M203  | Other deformity of hallux (acquired)       |
| M204  | Other hammer toe(s) (acquired)             |
| M205  | Other deformities of toe(s) (acquired)     |
| M206  | Acquired deformity of toe(s), unspecified  |
| M21   | Other acquired deformities of limbs        |
| M210  | Valgus deformity, not elsewhere classified |
| M2100 | Valgus deformity, not elsewhere classified |
| M2101 | Valgus deformity, not elsewhere classified |
| M2102 | Valgus deformity, not elsewhere classified |
| M2103 | Valgus deformity, not elsewhere classified |
| M2104 | Valgus deformity, not elsewhere classified |
| M2105 | Valgus deformity, not elsewhere classified |

|       |                                                    |
|-------|----------------------------------------------------|
| M2106 | Valgus deformity, not elsewhere classified         |
| M2107 | Valgus deformity, not elsewhere classified         |
| M2108 | Valgus deformity, not elsewhere classified         |
| M2109 | Valgus deformity, not elsewhere classified         |
| M211  | Varus deformity, not elsewhere classified          |
| M2110 | Varus deformity, not elsewhere classified          |
| M2111 | Varus deformity, not elsewhere classified          |
| M2112 | Varus deformity, not elsewhere classified          |
| M2113 | Varus deformity, not elsewhere classified          |
| M2114 | Varus deformity, not elsewhere classified          |
| M2115 | Varus deformity, not elsewhere classified          |
| M2116 | Varus deformity, not elsewhere classified          |
| M2117 | Varus deformity, not elsewhere classified          |
| M2118 | Varus deformity, not elsewhere classified          |
| M2119 | Varus deformity, not elsewhere classified          |
| M212  | Flexion deformity                                  |
| M2120 | Flexion deformity                                  |
| M2121 | Flexion deformity                                  |
| M2122 | Flexion deformity                                  |
| M2123 | Flexion deformity                                  |
| M2124 | Flexion deformity                                  |
| M2125 | Flexion deformity                                  |
| M2126 | Flexion deformity                                  |
| M2127 | Flexion deformity                                  |
| M2128 | Flexion deformity                                  |
| M2129 | Flexion deformity                                  |
| M213  | Wrist or foot drop (acquired)                      |
| M2130 | Wrist or foot drop (acquired)                      |
| M2133 | Wrist or foot drop (acquired)                      |
| M2134 | Wrist or foot drop (acquired)                      |
| M2137 | Wrist or foot drop (acquired)                      |
| M214  | Flat foot [pes planus] (acquired)                  |
| M215  | Acquired clawhand, clubhand, clawfoot and clubfoot |
| M2150 | Acquired clawhand, clubhand, clawfoot and clubfoot |
| M2154 | Acquired clawhand, clubhand, clawfoot and clubfoot |
| M2157 | Acquired clawhand, clubhand, clawfoot and clubfoot |
| M216  | Other acquired deformities of ankle and foot       |
| M217  | Unequal limb length (acquired)                     |
| M2170 | Unequal limb length (acquired)                     |
| M2172 | Unequal limb length (acquired)                     |
| M2173 | Unequal limb length (acquired)                     |
| M2174 | Unequal limb length (acquired)                     |
| M2175 | Unequal limb length (acquired)                     |
| M2176 | Unequal limb length (acquired)                     |
| M2177 | Unequal limb length (acquired)                     |
| M2179 | Unequal limb length (acquired)                     |
| M218  | Other specified acquired deformities of limbs      |
| M2180 | Other specified acquired deformities of limbs      |

|       |                                                   |
|-------|---------------------------------------------------|
| M2181 | Other specified acquired deformities of limbs     |
| M2182 | Other specified acquired deformities of limbs     |
| M2183 | Other specified acquired deformities of limbs     |
| M2184 | Other specified acquired deformities of limbs     |
| M2185 | Other specified acquired deformities of limbs     |
| M2186 | Other specified acquired deformities of limbs     |
| M2187 | Other specified acquired deformities of limbs     |
| M2189 | Other specified acquired deformities of limbs     |
| M219  | Acquired deformity of limb, unspecified           |
| M2190 | Acquired deformity of limb, unspecified           |
| M2191 | Acquired deformity of limb, unspecified           |
| M2192 | Acquired deformity of limb, unspecified           |
| M2193 | Acquired deformity of limb, unspecified           |
| M2194 | Acquired deformity of limb, unspecified           |
| M2195 | Acquired deformity of limb, unspecified           |
| M2196 | Acquired deformity of limb, unspecified           |
| M2197 | Acquired deformity of limb, unspecified           |
| M2199 | Acquired deformity of limb, unspecified           |
| M22   | Disorders of patella                              |
| M220  | Recurrent dislocation of patella                  |
| M221  | Recurrent subluxation of patella                  |
| M222  | Patellofemoral disorders                          |
| M223  | Other derangements of patella                     |
| M224  | Chondromalacia patellae                           |
| M228  | Other disorders of patella                        |
| M229  | Disorder of patella, unspecified                  |
| M23   | Internal derangement of knee                      |
| M230  | Cystic meniscus                                   |
| M2300 | Cystic meniscus                                   |
| M2301 | Cystic meniscus                                   |
| M2302 | Cystic meniscus                                   |
| M2303 | Cystic meniscus                                   |
| M2304 | Cystic meniscus                                   |
| M2305 | Cystic meniscus                                   |
| M2306 | Cystic meniscus                                   |
| M2309 | Cystic meniscus                                   |
| M231  | Discoid meniscus (congenital)                     |
| M2310 | Discoid meniscus (congenital)                     |
| M2311 | Discoid meniscus (congenital)                     |
| M2312 | Discoid meniscus (congenital)                     |
| M2313 | Discoid meniscus (congenital)                     |
| M2314 | Discoid meniscus (congenital)                     |
| M2315 | Discoid meniscus (congenital)                     |
| M2316 | Discoid meniscus (congenital)                     |
| M2319 | Discoid meniscus (congenital)                     |
| M232  | Derangement of meniscus due to old tear or injury |
| M2320 | Derangement of meniscus due to old tear or injury |
| M2321 | Derangement of meniscus due to old tear or injury |

|       |                                                     |
|-------|-----------------------------------------------------|
| M2322 | Derangement of meniscus due to old tear or injury   |
| M2323 | Derangement of meniscus due to old tear or injury   |
| M2324 | Derangement of meniscus due to old tear or injury   |
| M2325 | Derangement of meniscus due to old tear or injury   |
| M2326 | Derangement of meniscus due to old tear or injury   |
| M2329 | Derangement of meniscus due to old tear or injury   |
| M233  | Other meniscus derangements                         |
| M2330 | Other meniscus derangements                         |
| M2331 | Other meniscus derangements                         |
| M2332 | Other meniscus derangements                         |
| M2333 | Other meniscus derangements                         |
| M2334 | Other meniscus derangements                         |
| M2335 | Other meniscus derangements                         |
| M2336 | Other meniscus derangements                         |
| M2339 | Other meniscus derangements                         |
| M234  | Loose body in knee                                  |
| M235  | Chronic instability of knee                         |
| M2350 | Chronic instability of knee                         |
| M2351 | Chronic instability of knee                         |
| M2352 | Chronic instability of knee                         |
| M2353 | Chronic instability of knee                         |
| M2354 | Chronic instability of knee                         |
| M2355 | Chronic instability of knee                         |
| M2356 | Chronic instability of knee                         |
| M2357 | Chronic instability of knee                         |
| M2359 | Chronic instability of knee                         |
| M236  | Other spontaneous disruption of ligament(s) of knee |
| M2360 | Other spontaneous disruption of ligament(s) of knee |
| M2361 | Other spontaneous disruption of ligament(s) of knee |
| M2362 | Other spontaneous disruption of ligament(s) of knee |
| M2363 | Other spontaneous disruption of ligament(s) of knee |
| M2364 | Other spontaneous disruption of ligament(s) of knee |
| M2367 | Other spontaneous disruption of ligament(s) of knee |
| M2369 | Other spontaneous disruption of ligament(s) of knee |
| M238  | Other internal derangements of knee                 |
| M2380 | Other internal derangements of knee                 |
| M2381 | Other internal derangements of knee                 |
| M2382 | Other internal derangements of knee                 |
| M2383 | Other internal derangements of knee                 |
| M2384 | Other internal derangements of knee                 |
| M2385 | Other internal derangements of knee                 |
| M2386 | Other internal derangements of knee                 |
| M2387 | Other internal derangements of knee                 |
| M2389 | Other internal derangements of knee                 |
| M239  | Internal derangement of knee, unspecified           |
| M2390 | Internal derangement of knee, unspecified           |
| M2391 | Internal derangement of knee, unspecified           |
| M2392 | Internal derangement of knee, unspecified           |



|       |                                                                             |
|-------|-----------------------------------------------------------------------------|
| M2393 | Internal derangement of knee, unspecified                                   |
| M2394 | Internal derangement of knee, unspecified                                   |
| M2395 | Internal derangement of knee, unspecified                                   |
| M2396 | Internal derangement of knee, unspecified                                   |
| M2397 | Internal derangement of knee, unspecified                                   |
| M2399 | Internal derangement of knee, unspecified                                   |
| M24   | Other specific joint derangements                                           |
| M240  | Loose body in joint                                                         |
| M2400 | Loose body in joint                                                         |
| M2401 | Loose body in joint                                                         |
| M2402 | Loose body in joint                                                         |
| M2403 | Loose body in joint                                                         |
| M2404 | Loose body in joint                                                         |
| M2405 | Loose body in joint                                                         |
| M2407 | Loose body in joint                                                         |
| M2408 | Loose body in joint                                                         |
| M2409 | Loose body in joint                                                         |
| M241  | Other articular cartilage disorders                                         |
| M2410 | Other articular cartilage disorders                                         |
| M2411 | Other articular cartilage disorders                                         |
| M2412 | Other articular cartilage disorders                                         |
| M2413 | Other articular cartilage disorders                                         |
| M2414 | Other articular cartilage disorders                                         |
| M2415 | Other articular cartilage disorders                                         |
| M2416 | Other articular cartilage disorders                                         |
| M2417 | Other articular cartilage disorders                                         |
| M2418 | Other articular cartilage disorders                                         |
| M2419 | Other articular cartilage disorders                                         |
| M242  | Disorder of ligament                                                        |
| M2420 | Disorder of ligament                                                        |
| M2421 | Disorder of ligament                                                        |
| M2422 | Disorder of ligament                                                        |
| M2423 | Disorder of ligament                                                        |
| M2424 | Disorder of ligament                                                        |
| M2425 | Disorder of ligament                                                        |
| M2426 | Disorder of ligament                                                        |
| M2427 | Disorder of ligament                                                        |
| M2428 | Disorder of ligament                                                        |
| M2429 | Disorder of ligament                                                        |
| M243  | Pathological dislocation and subluxation of joint, not elsewhere classified |
| M2430 | Pathological dislocation and subluxation of joint, not elsewhere classified |
| M2431 | Pathological dislocation and subluxation of joint, not elsewhere classified |
| M2432 | Pathological dislocation and subluxation of joint, not elsewhere classified |
| M2433 | Pathological dislocation and subluxation of joint, not elsewhere classified |
| M2434 | Pathological dislocation and subluxation of joint, not elsewhere classified |
| M2435 | Pathological dislocation and subluxation of joint, not elsewhere classified |
| M2436 | Pathological dislocation and subluxation of joint, not elsewhere classified |
| M2437 | Pathological dislocation and subluxation of joint, not elsewhere classified |

|       |                                                                             |
|-------|-----------------------------------------------------------------------------|
| M2438 | Pathological dislocation and subluxation of joint, not elsewhere classified |
| M2439 | Pathological dislocation and subluxation of joint, not elsewhere classified |
| M244  | Recurrent dislocation and subluxation of joint                              |
| M2440 | Recurrent dislocation and subluxation of joint                              |
| M2441 | Recurrent dislocation and subluxation of joint                              |
| M2442 | Recurrent dislocation and subluxation of joint                              |
| M2443 | Recurrent dislocation and subluxation of joint                              |
| M2444 | Recurrent dislocation and subluxation of joint                              |
| M2445 | Recurrent dislocation and subluxation of joint                              |
| M2446 | Recurrent dislocation and subluxation of joint                              |
| M2447 | Recurrent dislocation and subluxation of joint                              |
| M2448 | Recurrent dislocation and subluxation of joint                              |
| M2449 | Recurrent dislocation and subluxation of joint                              |
| M245  | Contracture of joint                                                        |
| M2450 | Contracture of joint                                                        |
| M2451 | Contracture of joint                                                        |
| M2452 | Contracture of joint                                                        |
| M2453 | Contracture of joint                                                        |
| M2454 | Contracture of joint                                                        |
| M2455 | Contracture of joint                                                        |
| M2456 | Contracture of joint                                                        |
| M2457 | Contracture of joint                                                        |
| M2458 | Contracture of joint                                                        |
| M2459 | Contracture of joint                                                        |
| M246  | Ankylosis of joint                                                          |
| M2460 | Ankylosis of joint                                                          |
| M2461 | Ankylosis of joint                                                          |
| M2462 | Ankylosis of joint                                                          |
| M2463 | Ankylosis of joint                                                          |
| M2464 | Ankylosis of joint                                                          |
| M2465 | Ankylosis of joint                                                          |
| M2466 | Ankylosis of joint                                                          |
| M2467 | Ankylosis of joint                                                          |
| M2468 | Ankylosis of joint                                                          |
| M2469 | Ankylosis of joint                                                          |
| M247  | Protrusio acetabuli                                                         |
| M248  | Other specific joint derangements, not elsewhere classified                 |
| M2480 | Other specific joint derangements, not elsewhere classified                 |
| M2481 | Other specific joint derangements, not elsewhere classified                 |
| M2482 | Other specific joint derangements, not elsewhere classified                 |
| M2483 | Other specific joint derangements, not elsewhere classified                 |
| M2484 | Other specific joint derangements, not elsewhere classified                 |
| M2485 | Other specific joint derangements, not elsewhere classified                 |
| M2486 | Other specific joint derangements, not elsewhere classified                 |
| M2487 | Other specific joint derangements, not elsewhere classified                 |
| M2488 | Other specific joint derangements, not elsewhere classified                 |
| M2489 | Other specific joint derangements, not elsewhere classified                 |
| M249  | Joint derangement, unspecified                                              |

|       |                                                 |
|-------|-------------------------------------------------|
| M2490 | Joint derangement, unspecified                  |
| M2491 | Joint derangement, unspecified                  |
| M2492 | Joint derangement, unspecified                  |
| M2493 | Joint derangement, unspecified                  |
| M2494 | Joint derangement, unspecified                  |
| M2495 | Joint derangement, unspecified                  |
| M2496 | Joint derangement, unspecified                  |
| M2497 | Joint derangement, unspecified                  |
| M2498 | Joint derangement, unspecified                  |
| M2499 | Joint derangement, unspecified                  |
| M25   | Other joint disorders, not elsewhere classified |
| M250  | Haemarthrosis                                   |
| M2500 | Haemarthrosis                                   |
| M2501 | Haemarthrosis                                   |
| M2502 | Haemarthrosis                                   |
| M2503 | Haemarthrosis                                   |
| M2504 | Haemarthrosis                                   |
| M2505 | Haemarthrosis                                   |
| M2506 | Haemarthrosis                                   |
| M2507 | Haemarthrosis                                   |
| M2508 | Haemarthrosis                                   |
| M2509 | Haemarthrosis                                   |
| M251  | Fistula of joint                                |
| M2510 | Fistula of joint                                |
| M2511 | Fistula of joint                                |
| M2512 | Fistula of joint                                |
| M2513 | Fistula of joint                                |
| M2514 | Fistula of joint                                |
| M2515 | Fistula of joint                                |
| M2516 | Fistula of joint                                |
| M2517 | Fistula of joint                                |
| M2518 | Fistula of joint                                |
| M2519 | Fistula of joint                                |
| M252  | Flail joint                                     |
| M2520 | Flail joint                                     |
| M2521 | Flail joint                                     |
| M2522 | Flail joint                                     |
| M2523 | Flail joint                                     |
| M2524 | Flail joint                                     |
| M2525 | Flail joint                                     |
| M2526 | Flail joint                                     |
| M2527 | Flail joint                                     |
| M2528 | Flail joint                                     |
| M2529 | Flail joint                                     |
| M253  | Other instability of joint                      |
| M2530 | Other instability of joint                      |
| M2531 | Other instability of joint                      |
| M2532 | Other instability of joint                      |

|       |                                              |
|-------|----------------------------------------------|
| M2533 | Other instability of joint                   |
| M2534 | Other instability of joint                   |
| M2535 | Other instability of joint                   |
| M2536 | Other instability of joint                   |
| M2537 | Other instability of joint                   |
| M2538 | Other instability of joint                   |
| M2539 | Other instability of joint                   |
| M254  | Effusion of joint                            |
| M2540 | Effusion of joint                            |
| M2541 | Effusion of joint                            |
| M2542 | Effusion of joint                            |
| M2543 | Effusion of joint                            |
| M2544 | Effusion of joint                            |
| M2545 | Effusion of joint                            |
| M2546 | Effusion of joint                            |
| M2547 | Effusion of joint                            |
| M2548 | Effusion of joint                            |
| M2549 | Effusion of joint                            |
| M255  | Pain in joint                                |
| M2550 | Pain in joint                                |
| M2551 | Pain in joint                                |
| M2552 | Pain in joint                                |
| M2553 | Pain in joint                                |
| M2554 | Pain in joint                                |
| M2555 | Pain in joint                                |
| M2556 | Pain in joint                                |
| M2557 | Pain in joint                                |
| M2558 | Pain in joint                                |
| M2559 | Pain in joint                                |
| M256  | Stiffness of joint, not elsewhere classified |
| M2560 | Stiffness of joint, not elsewhere classified |
| M2561 | Stiffness of joint, not elsewhere classified |
| M2562 | Stiffness of joint, not elsewhere classified |
| M2563 | Stiffness of joint, not elsewhere classified |
| M2564 | Stiffness of joint, not elsewhere classified |
| M2565 | Stiffness of joint, not elsewhere classified |
| M2566 | Stiffness of joint, not elsewhere classified |
| M2567 | Stiffness of joint, not elsewhere classified |
| M2568 | Stiffness of joint, not elsewhere classified |
| M2569 | Stiffness of joint, not elsewhere classified |
| M257  | Osteophyte                                   |
| M2570 | Osteophyte                                   |
| M2571 | Osteophyte                                   |
| M2572 | Osteophyte                                   |
| M2573 | Osteophyte                                   |
| M2574 | Osteophyte                                   |
| M2575 | Osteophyte                                   |
| M2576 | Osteophyte                                   |

|       |                                                               |
|-------|---------------------------------------------------------------|
| M2577 | Osteophyte                                                    |
| M2578 | Osteophyte                                                    |
| M2579 | Osteophyte                                                    |
| M258  | Other specified joint disorders                               |
| M2580 | Other specified joint disorders                               |
| M2581 | Other specified joint disorders                               |
| M2582 | Other specified joint disorders                               |
| M2583 | Other specified joint disorders                               |
| M2584 | Other specified joint disorders                               |
| M2585 | Other specified joint disorders                               |
| M2586 | Other specified joint disorders                               |
| M2587 | Other specified joint disorders                               |
| M2588 | Other specified joint disorders                               |
| M2589 | Other specified joint disorders                               |
| M259  | Joint disorder, unspecified                                   |
| M2590 | Joint disorder, unspecified                                   |
| M2591 | Joint disorder, unspecified                                   |
| M2592 | Joint disorder, unspecified                                   |
| M2593 | Joint disorder, unspecified                                   |
| M2594 | Joint disorder, unspecified                                   |
| M2595 | Joint disorder, unspecified                                   |
| M2596 | Joint disorder, unspecified                                   |
| M2597 | Joint disorder, unspecified                                   |
| M2598 | Joint disorder, unspecified                                   |
| M2599 | Joint disorder, unspecified                                   |
| M30   | Polyarteritis nodosa and related conditions                   |
| M300  | Polyarteritis nodosa                                          |
| M301  | Polyarteritis with lung involvement [Churg-Strauss]           |
| M302  | Juvenile polyarteritis                                        |
| M303  | Mucocutaneous lymph node syndrome [Kawasaki]                  |
| M308  | Other conditions related to polyarteritis nodosa              |
| M31   | Other necrotizing vasculopathies                              |
| M310  | Hypersensitivity angiitis                                     |
| M311  | Thrombotic microangiopathy                                    |
| M312  | Lethal midline granuloma                                      |
| M313  | Wegener granulomatosis                                        |
| M313  | Wegener's granulomatosis                                      |
| M314  | Aortic arch syndrome [Takayasu]                               |
| M315  | Giant cell arteritis with polymyalgia rheumatica              |
| M316  | Other giant cell arteritis                                    |
| M317  | Microscopic polyangiitis                                      |
| M318  | Other specified necrotizing vasculopathies                    |
| M319  | Necrotizing vasculopathy, unspecified                         |
| M32   | Systemic lupus erythematosus                                  |
| M320  | Drug-induced systemic lupus erythematosus                     |
| M321  | Systemic lupus erythematosus with organ or system involvement |
| M328  | Other forms of systemic lupus erythematosus                   |
| M329  | Systemic lupus erythematosus, unspecified                     |

|       |                                                                                |
|-------|--------------------------------------------------------------------------------|
| M33   | Dermatopolymyositis                                                            |
| M330  | Juvenile dermatomyositis                                                       |
| M331  | Other dermatomyositis                                                          |
| M332  | Polymyositis                                                                   |
| M339  | Dermatopolymyositis, unspecified                                               |
| M34   | Systemic sclerosis                                                             |
| M340  | Progressive systemic sclerosis                                                 |
| M341  | CR(E)ST syndrome                                                               |
| M342  | Systemic sclerosis induced by drugs and chemicals                              |
| M348  | Other forms of systemic sclerosis                                              |
| M349  | Systemic sclerosis, unspecified                                                |
| M35   | Other systemic involvement of connective tissue                                |
| M350  | Sicca syndrome [Sjögren]                                                       |
| M351  | Other overlap syndromes                                                        |
| M352  | Behçet disease                                                                 |
| M352  | Behçet's disease                                                               |
| M353  | Polymyalgia rheumatica                                                         |
| M354  | Diffuse (eosinophilic) fasciitis                                               |
| M355  | Multifocal fibrosclerosis                                                      |
| M356  | Relapsing panniculitis [Weber-Christian]                                       |
| M357  | Hypermobility syndrome                                                         |
| M358  | Other specified systemic involvement of connective tissue                      |
| M359  | Systemic involvement of connective tissue, unspecified                         |
| M36   | Systemic disorders of connective tissue in diseases classified elsewhere       |
| M360  | Dermato(poly)myositis in neoplastic disease                                    |
| M361  | Arthropathy in neoplastic disease                                              |
| M362  | Haemophilic arthropathy                                                        |
| M363  | Arthropathy in other blood disorders                                           |
| M364  | Arthropathy in hypersensitivity reactions classified elsewhere                 |
| M368  | Systemic disorders of connective tissue in other diseases classified elsewhere |
| M40   | Kyphosis and lordosis                                                          |
| M400  | Postural kyphosis                                                              |
| M4000 | Postural kyphosis                                                              |
| M4001 | Postural kyphosis                                                              |
| M4002 | Postural kyphosis                                                              |
| M4003 | Postural kyphosis                                                              |
| M4004 | Postural kyphosis                                                              |
| M4005 | Postural kyphosis                                                              |
| M4006 | Postural kyphosis                                                              |
| M4007 | Postural kyphosis                                                              |
| M4008 | Postural kyphosis                                                              |
| M4009 | Postural kyphosis                                                              |
| M401  | Other secondary kyphosis                                                       |
| M4010 | Other secondary kyphosis                                                       |
| M4011 | Other secondary kyphosis                                                       |
| M4012 | Other secondary kyphosis                                                       |
| M4013 | Other secondary kyphosis                                                       |
| M4014 | Other secondary kyphosis                                                       |

|       |                                |
|-------|--------------------------------|
| M4015 | Other secondary kyphosis       |
| M4016 | Other secondary kyphosis       |
| M4017 | Other secondary kyphosis       |
| M4018 | Other secondary kyphosis       |
| M4019 | Other secondary kyphosis       |
| M402  | Other and unspecified kyphosis |
| M4020 | Other and unspecified kyphosis |
| M4021 | Other and unspecified kyphosis |
| M4022 | Other and unspecified kyphosis |
| M4023 | Other and unspecified kyphosis |
| M4024 | Other and unspecified kyphosis |
| M4025 | Other and unspecified kyphosis |
| M4026 | Other and unspecified kyphosis |
| M4027 | Other and unspecified kyphosis |
| M4028 | Other and unspecified kyphosis |
| M4029 | Other and unspecified kyphosis |
| M403  | Flatback syndrome              |
| M4030 | Flatback syndrome              |
| M4031 | Flatback syndrome              |
| M4032 | Flatback syndrome              |
| M4033 | Flatback syndrome              |
| M4034 | Flatback syndrome              |
| M4035 | Flatback syndrome              |
| M4036 | Flatback syndrome              |
| M4037 | Flatback syndrome              |
| M4038 | Flatback syndrome              |
| M4039 | Flatback syndrome              |
| M404  | Other lordosis                 |
| M4040 | Other lordosis                 |
| M4041 | Other lordosis                 |
| M4042 | Other lordosis                 |
| M4043 | Other lordosis                 |
| M4044 | Other lordosis                 |
| M4045 | Other lordosis                 |
| M4046 | Other lordosis                 |
| M4047 | Other lordosis                 |
| M4048 | Other lordosis                 |
| M4049 | Other lordosis                 |
| M405  | Lordosis, unspecified          |
| M4050 | Lordosis, unspecified          |
| M4051 | Lordosis, unspecified          |
| M4052 | Lordosis, unspecified          |
| M4053 | Lordosis, unspecified          |
| M4054 | Lordosis, unspecified          |
| M4055 | Lordosis, unspecified          |
| M4056 | Lordosis, unspecified          |
| M4057 | Lordosis, unspecified          |
| M4058 | Lordosis, unspecified          |

|       |                                |
|-------|--------------------------------|
| M4059 | Lordosis, unspecified          |
| M41   | Scoliosis                      |
| M410  | Infantile idiopathic scoliosis |
| M4100 | Infantile idiopathic scoliosis |
| M4101 | Infantile idiopathic scoliosis |
| M4102 | Infantile idiopathic scoliosis |
| M4103 | Infantile idiopathic scoliosis |
| M4104 | Infantile idiopathic scoliosis |
| M4105 | Infantile idiopathic scoliosis |
| M4106 | Infantile idiopathic scoliosis |
| M4107 | Infantile idiopathic scoliosis |
| M4108 | Infantile idiopathic scoliosis |
| M4109 | Infantile idiopathic scoliosis |
| M411  | Juvenile idiopathic scoliosis  |
| M4110 | Juvenile idiopathic scoliosis  |
| M4111 | Juvenile idiopathic scoliosis  |
| M4112 | Juvenile idiopathic scoliosis  |
| M4113 | Juvenile idiopathic scoliosis  |
| M4114 | Juvenile idiopathic scoliosis  |
| M4115 | Juvenile idiopathic scoliosis  |
| M4116 | Juvenile idiopathic scoliosis  |
| M4117 | Juvenile idiopathic scoliosis  |
| M4118 | Juvenile idiopathic scoliosis  |
| M4119 | Juvenile idiopathic scoliosis  |
| M412  | Other idiopathic scoliosis     |
| M4120 | Other idiopathic scoliosis     |
| M4121 | Other idiopathic scoliosis     |
| M4122 | Other idiopathic scoliosis     |
| M4123 | Other idiopathic scoliosis     |
| M4124 | Other idiopathic scoliosis     |
| M4125 | Other idiopathic scoliosis     |
| M4126 | Other idiopathic scoliosis     |
| M4127 | Other idiopathic scoliosis     |
| M4128 | Other idiopathic scoliosis     |
| M4129 | Other idiopathic scoliosis     |
| M413  | Thoracogenic scoliosis         |
| M4130 | Thoracogenic scoliosis         |
| M4133 | Thoracogenic scoliosis         |
| M4134 | Thoracogenic scoliosis         |
| M4135 | Thoracogenic scoliosis         |
| M414  | Neuromuscular scoliosis        |
| M4140 | Neuromuscular scoliosis        |
| M4141 | Neuromuscular scoliosis        |
| M4142 | Neuromuscular scoliosis        |
| M4143 | Neuromuscular scoliosis        |
| M4144 | Neuromuscular scoliosis        |
| M4145 | Neuromuscular scoliosis        |
| M4146 | Neuromuscular scoliosis        |



|       |                                   |
|-------|-----------------------------------|
| M4147 | Neuromuscular scoliosis           |
| M4148 | Neuromuscular scoliosis           |
| M4149 | Neuromuscular scoliosis           |
| M415  | Other secondary scoliosis         |
| M4150 | Other secondary scoliosis         |
| M4151 | Other secondary scoliosis         |
| M4152 | Other secondary scoliosis         |
| M4153 | Other secondary scoliosis         |
| M4154 | Other secondary scoliosis         |
| M4155 | Other secondary scoliosis         |
| M4156 | Other secondary scoliosis         |
| M4157 | Other secondary scoliosis         |
| M4158 | Other secondary scoliosis         |
| M4159 | Other secondary scoliosis         |
| M418  | Other forms of scoliosis          |
| M4180 | Other forms of scoliosis          |
| M4181 | Other forms of scoliosis          |
| M4182 | Other forms of scoliosis          |
| M4183 | Other forms of scoliosis          |
| M4184 | Other forms of scoliosis          |
| M4185 | Other forms of scoliosis          |
| M4186 | Other forms of scoliosis          |
| M4187 | Other forms of scoliosis          |
| M4188 | Other forms of scoliosis          |
| M4189 | Other forms of scoliosis          |
| M419  | Scoliosis, unspecified            |
| M4190 | Scoliosis, unspecified            |
| M4191 | Scoliosis, unspecified            |
| M4192 | Scoliosis, unspecified            |
| M4193 | Scoliosis, unspecified            |
| M4194 | Scoliosis, unspecified            |
| M4195 | Scoliosis, unspecified            |
| M4196 | Scoliosis, unspecified            |
| M4197 | Scoliosis, unspecified            |
| M4198 | Scoliosis, unspecified            |
| M4199 | Scoliosis, unspecified            |
| M42   | Spinal osteochondrosis            |
| M420  | Juvenile osteochondrosis of spine |
| M4200 | Juvenile osteochondrosis of spine |
| M4201 | Juvenile osteochondrosis of spine |
| M4202 | Juvenile osteochondrosis of spine |
| M4203 | Juvenile osteochondrosis of spine |
| M4204 | Juvenile osteochondrosis of spine |
| M4205 | Juvenile osteochondrosis of spine |
| M4206 | Juvenile osteochondrosis of spine |
| M4207 | Juvenile osteochondrosis of spine |
| M4208 | Juvenile osteochondrosis of spine |
| M4209 | Juvenile osteochondrosis of spine |

|       |                                     |
|-------|-------------------------------------|
| M421  | Adult osteochondrosis of spine      |
| M4210 | Adult osteochondrosis of spine      |
| M4211 | Adult osteochondrosis of spine      |
| M4212 | Adult osteochondrosis of spine      |
| M4213 | Adult osteochondrosis of spine      |
| M4214 | Adult osteochondrosis of spine      |
| M4215 | Adult osteochondrosis of spine      |
| M4216 | Adult osteochondrosis of spine      |
| M4217 | Adult osteochondrosis of spine      |
| M4218 | Adult osteochondrosis of spine      |
| M4219 | Adult osteochondrosis of spine      |
| M429  | Spinal osteochondrosis, unspecified |
| M4290 | Spinal osteochondrosis, unspecified |
| M4291 | Spinal osteochondrosis, unspecified |
| M4292 | Spinal osteochondrosis, unspecified |
| M4293 | Spinal osteochondrosis, unspecified |
| M4294 | Spinal osteochondrosis, unspecified |
| M4295 | Spinal osteochondrosis, unspecified |
| M4296 | Spinal osteochondrosis, unspecified |
| M4297 | Spinal osteochondrosis, unspecified |
| M4298 | Spinal osteochondrosis, unspecified |
| M4299 | Spinal osteochondrosis, unspecified |
| M43   | Other deforming dorsopathies        |
| M430  | Spondylolysis                       |
| M4300 | Spondylolysis                       |
| M4301 | Spondylolysis                       |
| M4302 | Spondylolysis                       |
| M4303 | Spondylolysis                       |
| M4304 | Spondylolysis                       |
| M4305 | Spondylolysis                       |
| M4306 | Spondylolysis                       |
| M4307 | Spondylolysis                       |
| M4308 | Spondylolysis                       |
| M4309 | Spondylolysis                       |
| M431  | Spondylolisthesis                   |
| M4310 | Spondylolisthesis                   |
| M4311 | Spondylolisthesis                   |
| M4312 | Spondylolisthesis                   |
| M4313 | Spondylolisthesis                   |
| M4314 | Spondylolisthesis                   |
| M4315 | Spondylolisthesis                   |
| M4316 | Spondylolisthesis                   |
| M4317 | Spondylolisthesis                   |
| M4318 | Spondylolisthesis                   |
| M4319 | Spondylolisthesis                   |
| M432  | Other fusion of spine               |
| M4320 | Other fusion of spine               |
| M4321 | Other fusion of spine               |

|       |                                                    |
|-------|----------------------------------------------------|
| M4322 | Other fusion of spine                              |
| M4323 | Other fusion of spine                              |
| M4324 | Other fusion of spine                              |
| M4325 | Other fusion of spine                              |
| M4326 | Other fusion of spine                              |
| M4327 | Other fusion of spine                              |
| M4328 | Other fusion of spine                              |
| M4329 | Other fusion of spine                              |
| M433  | Recurrent atlantoaxial subluxation with myelopathy |
| M4330 | Recurrent atlantoaxial subluxation with myelopathy |
| M4331 | Recurrent atlantoaxial subluxation with myelopathy |
| M4332 | Recurrent atlantoaxial subluxation with myelopathy |
| M4333 | Recurrent atlantoaxial subluxation with myelopathy |
| M4334 | Recurrent atlantoaxial subluxation with myelopathy |
| M4335 | Recurrent atlantoaxial subluxation with myelopathy |
| M4336 | Recurrent atlantoaxial subluxation with myelopathy |
| M4337 | Recurrent atlantoaxial subluxation with myelopathy |
| M4338 | Recurrent atlantoaxial subluxation with myelopathy |
| M4339 | Recurrent atlantoaxial subluxation with myelopathy |
| M434  | Other recurrent atlantoaxial subluxation           |
| M435  | Other recurrent vertebral subluxation              |
| M4350 | Other recurrent vertebral subluxation              |
| M4352 | Other recurrent vertebral subluxation              |
| M4353 | Other recurrent vertebral subluxation              |
| M4354 | Other recurrent vertebral subluxation              |
| M4355 | Other recurrent vertebral subluxation              |
| M4356 | Other recurrent vertebral subluxation              |
| M4357 | Other recurrent vertebral subluxation              |
| M4358 | Other recurrent vertebral subluxation              |
| M4359 | Other recurrent vertebral subluxation              |
| M436  | Torticollis                                        |
| M438  | Other specified deforming dorsopathies             |
| M4380 | Other specified deforming dorsopathies             |
| M4381 | Other specified deforming dorsopathies             |
| M4382 | Other specified deforming dorsopathies             |
| M4383 | Other specified deforming dorsopathies             |
| M4384 | Other specified deforming dorsopathies             |
| M4385 | Other specified deforming dorsopathies             |
| M4386 | Other specified deforming dorsopathies             |
| M4387 | Other specified deforming dorsopathies             |
| M4388 | Other specified deforming dorsopathies             |
| M4389 | Other specified deforming dorsopathies             |
| M439  | Deforming dorsopathy, unspecified                  |
| M4390 | Deforming dorsopathy, unspecified                  |
| M4391 | Deforming dorsopathy, unspecified                  |
| M4392 | Deforming dorsopathy, unspecified                  |
| M4393 | Deforming dorsopathy, unspecified                  |
| M4394 | Deforming dorsopathy, unspecified                  |

|       |                                             |
|-------|---------------------------------------------|
| M4395 | Deforming dorsopathy, unspecified           |
| M4396 | Deforming dorsopathy, unspecified           |
| M4397 | Deforming dorsopathy, unspecified           |
| M4398 | Deforming dorsopathy, unspecified           |
| M4399 | Deforming dorsopathy, unspecified           |
| M45X  | Ankylosing spondylitis                      |
| M45X0 | Ankylosing spondylitis                      |
| M45X1 | Ankylosing spondylitis                      |
| M45X2 | Ankylosing spondylitis                      |
| M45X3 | Ankylosing spondylitis                      |
| M45X4 | Ankylosing spondylitis                      |
| M45X5 | Ankylosing spondylitis                      |
| M45X6 | Ankylosing spondylitis                      |
| M45X7 | Ankylosing spondylitis                      |
| M45X8 | Ankylosing spondylitis                      |
| M45X9 | Ankylosing spondylitis                      |
| M46   | Other inflammatory spondylopathies          |
| M460  | Spinal enthesopathy                         |
| M4600 | Spinal enthesopathy                         |
| M4601 | Spinal enthesopathy                         |
| M4602 | Spinal enthesopathy                         |
| M4603 | Spinal enthesopathy                         |
| M4604 | Spinal enthesopathy                         |
| M4605 | Spinal enthesopathy                         |
| M4606 | Spinal enthesopathy                         |
| M4607 | Spinal enthesopathy                         |
| M4608 | Spinal enthesopathy                         |
| M4609 | Spinal enthesopathy                         |
| M461  | Sacroiliitis, not elsewhere classified      |
| M462  | Osteomyelitis of vertebra                   |
| M4620 | Osteomyelitis of vertebra                   |
| M4621 | Osteomyelitis of vertebra                   |
| M4622 | Osteomyelitis of vertebra                   |
| M4623 | Osteomyelitis of vertebra                   |
| M4624 | Osteomyelitis of vertebra                   |
| M4625 | Osteomyelitis of vertebra                   |
| M4626 | Osteomyelitis of vertebra                   |
| M4627 | Osteomyelitis of vertebra                   |
| M4628 | Osteomyelitis of vertebra                   |
| M4629 | Osteomyelitis of vertebra                   |
| M463  | Infection of intervertebral disc (pyogenic) |
| M4630 | Infection of intervertebral disc (pyogenic) |
| M4631 | Infection of intervertebral disc (pyogenic) |
| M4632 | Infection of intervertebral disc (pyogenic) |
| M4633 | Infection of intervertebral disc (pyogenic) |
| M4634 | Infection of intervertebral disc (pyogenic) |
| M4635 | Infection of intervertebral disc (pyogenic) |
| M4636 | Infection of intervertebral disc (pyogenic) |

|       |                                              |
|-------|----------------------------------------------|
| M4637 | Infection of intervertebral disc (pyogenic)  |
| M4638 | Infection of intervertebral disc (pyogenic)  |
| M4639 | Infection of intervertebral disc (pyogenic)  |
| M464  | Discitis, unspecified                        |
| M4640 | Discitis, unspecified                        |
| M4641 | Discitis, unspecified                        |
| M4642 | Discitis, unspecified                        |
| M4643 | Discitis, unspecified                        |
| M4644 | Discitis, unspecified                        |
| M4645 | Discitis, unspecified                        |
| M4646 | Discitis, unspecified                        |
| M4647 | Discitis, unspecified                        |
| M4648 | Discitis, unspecified                        |
| M4649 | Discitis, unspecified                        |
| M465  | Other infective spondylopathies              |
| M4650 | Other infective spondylopathies              |
| M4651 | Other infective spondylopathies              |
| M4652 | Other infective spondylopathies              |
| M4653 | Other infective spondylopathies              |
| M4654 | Other infective spondylopathies              |
| M4655 | Other infective spondylopathies              |
| M4656 | Other infective spondylopathies              |
| M4657 | Other infective spondylopathies              |
| M4658 | Other infective spondylopathies              |
| M4659 | Other infective spondylopathies              |
| M468  | Other specified inflammatory spondylopathies |
| M4680 | Other specified inflammatory spondylopathies |
| M4681 | Other specified inflammatory spondylopathies |
| M4682 | Other specified inflammatory spondylopathies |
| M4683 | Other specified inflammatory spondylopathies |
| M4684 | Other specified inflammatory spondylopathies |
| M4685 | Other specified inflammatory spondylopathies |
| M4686 | Other specified inflammatory spondylopathies |
| M4687 | Other specified inflammatory spondylopathies |
| M4688 | Other specified inflammatory spondylopathies |
| M4689 | Other specified inflammatory spondylopathies |
| M469  | Inflammatory spondylopathy, unspecified      |
| M4690 | Inflammatory spondylopathy, unspecified      |
| M4691 | Inflammatory spondylopathy, unspecified      |
| M4692 | Inflammatory spondylopathy, unspecified      |
| M4693 | Inflammatory spondylopathy, unspecified      |
| M4694 | Inflammatory spondylopathy, unspecified      |
| M4695 | Inflammatory spondylopathy, unspecified      |
| M4696 | Inflammatory spondylopathy, unspecified      |
| M4697 | Inflammatory spondylopathy, unspecified      |
| M4698 | Inflammatory spondylopathy, unspecified      |
| M4699 | Inflammatory spondylopathy, unspecified      |
| M47   | Spondylosis                                  |

|       |                                                            |
|-------|------------------------------------------------------------|
| M470  | Anterior spinal and vertebral artery compression syndromes |
| M4700 | Anterior spinal and vertebral artery compression syndromes |
| M4701 | Anterior spinal and vertebral artery compression syndromes |
| M4702 | Anterior spinal and vertebral artery compression syndromes |
| M4703 | Anterior spinal and vertebral artery compression syndromes |
| M4704 | Anterior spinal and vertebral artery compression syndromes |
| M4705 | Anterior spinal and vertebral artery compression syndromes |
| M4706 | Anterior spinal and vertebral artery compression syndromes |
| M4707 | Anterior spinal and vertebral artery compression syndromes |
| M4708 | Anterior spinal and vertebral artery compression syndromes |
| M4709 | Anterior spinal and vertebral artery compression syndromes |
| M471  | Other spondylosis with myelopathy                          |
| M4710 | Other spondylosis with myelopathy                          |
| M4711 | Other spondylosis with myelopathy                          |
| M4712 | Other spondylosis with myelopathy                          |
| M4713 | Other spondylosis with myelopathy                          |
| M4714 | Other spondylosis with myelopathy                          |
| M4715 | Other spondylosis with myelopathy                          |
| M4716 | Other spondylosis with myelopathy                          |
| M4717 | Other spondylosis with myelopathy                          |
| M4718 | Other spondylosis with myelopathy                          |
| M4719 | Other spondylosis with myelopathy                          |
| M472  | Other spondylosis with radiculopathy                       |
| M4720 | Other spondylosis with radiculopathy                       |
| M4721 | Other spondylosis with radiculopathy                       |
| M4722 | Other spondylosis with radiculopathy                       |
| M4723 | Other spondylosis with radiculopathy                       |
| M4724 | Other spondylosis with radiculopathy                       |
| M4725 | Other spondylosis with radiculopathy                       |
| M4726 | Other spondylosis with radiculopathy                       |
| M4727 | Other spondylosis with radiculopathy                       |
| M4728 | Other spondylosis with radiculopathy                       |
| M4729 | Other spondylosis with radiculopathy                       |
| M478  | Other spondylosis                                          |
| M4780 | Other spondylosis                                          |
| M4781 | Other spondylosis                                          |
| M4782 | Other spondylosis                                          |
| M4783 | Other spondylosis                                          |
| M4784 | Other spondylosis                                          |
| M4785 | Other spondylosis                                          |
| M4786 | Other spondylosis                                          |
| M4787 | Other spondylosis                                          |
| M4788 | Other spondylosis                                          |
| M4789 | Other spondylosis                                          |
| M479  | Spondylosis, unspecified                                   |
| M4790 | Spondylosis, unspecified                                   |
| M4791 | Spondylosis, unspecified                                   |
| M4792 | Spondylosis, unspecified                                   |

|       |                                     |
|-------|-------------------------------------|
| M4793 | Spondylosis, unspecified            |
| M4794 | Spondylosis, unspecified            |
| M4795 | Spondylosis, unspecified            |
| M4796 | Spondylosis, unspecified            |
| M4797 | Spondylosis, unspecified            |
| M4798 | Spondylosis, unspecified            |
| M4799 | Spondylosis, unspecified            |
| M48   | Other spondylopathies               |
| M480  | Spinal stenosis                     |
| M4800 | Spinal stenosis                     |
| M4801 | Spinal stenosis                     |
| M4802 | Spinal stenosis                     |
| M4803 | Spinal stenosis                     |
| M4804 | Spinal stenosis                     |
| M4805 | Spinal stenosis                     |
| M4806 | Spinal stenosis                     |
| M4807 | Spinal stenosis                     |
| M4808 | Spinal stenosis                     |
| M4809 | Spinal stenosis                     |
| M481  | Ankylosing hyperostosis [Forestier] |
| M4810 | Ankylosing hyperostosis [Forestier] |
| M4811 | Ankylosing hyperostosis [Forestier] |
| M4812 | Ankylosing hyperostosis [Forestier] |
| M4813 | Ankylosing hyperostosis [Forestier] |
| M4814 | Ankylosing hyperostosis [Forestier] |
| M4815 | Ankylosing hyperostosis [Forestier] |
| M4816 | Ankylosing hyperostosis [Forestier] |
| M4817 | Ankylosing hyperostosis [Forestier] |
| M4818 | Ankylosing hyperostosis [Forestier] |
| M4819 | Ankylosing hyperostosis [Forestier] |
| M482  | Kissing spine                       |
| M4820 | Kissing spine                       |
| M4821 | Kissing spine                       |
| M4822 | Kissing spine                       |
| M4823 | Kissing spine                       |
| M4824 | Kissing spine                       |
| M4825 | Kissing spine                       |
| M4826 | Kissing spine                       |
| M4827 | Kissing spine                       |
| M4828 | Kissing spine                       |
| M4829 | Kissing spine                       |
| M483  | Traumatic spondylopathy             |
| M4830 | Traumatic spondylopathy             |
| M4831 | Traumatic spondylopathy             |
| M4832 | Traumatic spondylopathy             |
| M4833 | Traumatic spondylopathy             |
| M4834 | Traumatic spondylopathy             |
| M4835 | Traumatic spondylopathy             |

|       |                                              |
|-------|----------------------------------------------|
| M4836 | Traumatic spondylopathy                      |
| M4837 | Traumatic spondylopathy                      |
| M4838 | Traumatic spondylopathy                      |
| M4839 | Traumatic spondylopathy                      |
| M484  | Fatigue fracture of vertebra                 |
| M4840 | Fatigue fracture of vertebra                 |
| M4841 | Fatigue fracture of vertebra                 |
| M4842 | Fatigue fracture of vertebra                 |
| M4843 | Fatigue fracture of vertebra                 |
| M4844 | Fatigue fracture of vertebra                 |
| M4845 | Fatigue fracture of vertebra                 |
| M4846 | Fatigue fracture of vertebra                 |
| M4847 | Fatigue fracture of vertebra                 |
| M4848 | Fatigue fracture of vertebra                 |
| M4849 | Fatigue fracture of vertebra                 |
| M485  | Collapsed vertebra, not elsewhere classified |
| M4850 | Collapsed vertebra, not elsewhere classified |
| M4851 | Collapsed vertebra, not elsewhere classified |
| M4852 | Collapsed vertebra, not elsewhere classified |
| M4853 | Collapsed vertebra, not elsewhere classified |
| M4854 | Collapsed vertebra, not elsewhere classified |
| M4855 | Collapsed vertebra, not elsewhere classified |
| M4856 | Collapsed vertebra, not elsewhere classified |
| M4857 | Collapsed vertebra, not elsewhere classified |
| M4858 | Collapsed vertebra, not elsewhere classified |
| M4859 | Collapsed vertebra, not elsewhere classified |
| M488  | Other specified spondylopathies              |
| M4880 | Other specified spondylopathies              |
| M4881 | Other specified spondylopathies              |
| M4882 | Other specified spondylopathies              |
| M4883 | Other specified spondylopathies              |
| M4884 | Other specified spondylopathies              |
| M4885 | Other specified spondylopathies              |
| M4886 | Other specified spondylopathies              |
| M4887 | Other specified spondylopathies              |
| M4888 | Other specified spondylopathies              |
| M4889 | Other specified spondylopathies              |
| M489  | Spondylopathy, unspecified                   |
| M4890 | Spondylopathy, unspecified                   |
| M4891 | Spondylopathy, unspecified                   |
| M4892 | Spondylopathy, unspecified                   |
| M4893 | Spondylopathy, unspecified                   |
| M4894 | Spondylopathy, unspecified                   |
| M4895 | Spondylopathy, unspecified                   |
| M4896 | Spondylopathy, unspecified                   |
| M4897 | Spondylopathy, unspecified                   |
| M4898 | Spondylopathy, unspecified                   |
| M4899 | Spondylopathy, unspecified                   |



|       |                                                                               |
|-------|-------------------------------------------------------------------------------|
| M49   | Spondylopathies in diseases classified elsewhere                              |
| M490  | Tuberculosis of spine                                                         |
| M4900 | Tuberculosis of spine                                                         |
| M4901 | Tuberculosis of spine                                                         |
| M4902 | Tuberculosis of spine                                                         |
| M4903 | Tuberculosis of spine                                                         |
| M4904 | Tuberculosis of spine                                                         |
| M4905 | Tuberculosis of spine                                                         |
| M4906 | Tuberculosis of spine                                                         |
| M4907 | Tuberculosis of spine                                                         |
| M4908 | Tuberculosis of spine                                                         |
| M4909 | Tuberculosis of spine                                                         |
| M491  | Brucella spondylitis                                                          |
| M4910 | Brucella spondylitis                                                          |
| M4911 | Brucella spondylitis                                                          |
| M4912 | Brucella spondylitis                                                          |
| M4913 | Brucella spondylitis                                                          |
| M4914 | Brucella spondylitis                                                          |
| M4915 | Brucella spondylitis                                                          |
| M4916 | Brucella spondylitis                                                          |
| M4917 | Brucella spondylitis                                                          |
| M4918 | Brucella spondylitis                                                          |
| M4919 | Brucella spondylitis                                                          |
| M492  | Enterobacterial spondylitis                                                   |
| M4920 | Enterobacterial spondylitis                                                   |
| M4921 | Enterobacterial spondylitis                                                   |
| M4922 | Enterobacterial spondylitis                                                   |
| M4923 | Enterobacterial spondylitis                                                   |
| M4924 | Enterobacterial spondylitis                                                   |
| M4925 | Enterobacterial spondylitis                                                   |
| M4926 | Enterobacterial spondylitis                                                   |
| M4927 | Enterobacterial spondylitis                                                   |
| M4928 | Enterobacterial spondylitis                                                   |
| M4929 | Enterobacterial spondylitis                                                   |
| M493  | Spondylopathy in other infectious and parasitic diseases classified elsewhere |
| M4930 | Spondylopathy in other infectious and parasitic diseases classified elsewhere |
| M4931 | Spondylopathy in other infectious and parasitic diseases classified elsewhere |
| M4932 | Spondylopathy in other infectious and parasitic diseases classified elsewhere |
| M4933 | Spondylopathy in other infectious and parasitic diseases classified elsewhere |
| M4934 | Spondylopathy in other infectious and parasitic diseases classified elsewhere |
| M4935 | Spondylopathy in other infectious and parasitic diseases classified elsewhere |
| M4936 | Spondylopathy in other infectious and parasitic diseases classified elsewhere |
| M4937 | Spondylopathy in other infectious and parasitic diseases classified elsewhere |
| M4938 | Spondylopathy in other infectious and parasitic diseases classified elsewhere |
| M4939 | Spondylopathy in other infectious and parasitic diseases classified elsewhere |
| M494  | Neuropathic spondylopathy                                                     |
| M4940 | Neuropathic spondylopathy                                                     |
| M4941 | Neuropathic spondylopathy                                                     |

|       |                                                                   |
|-------|-------------------------------------------------------------------|
| M4942 | Neuropathic spondylopathy                                         |
| M4943 | Neuropathic spondylopathy                                         |
| M4944 | Neuropathic spondylopathy                                         |
| M4945 | Neuropathic spondylopathy                                         |
| M4946 | Neuropathic spondylopathy                                         |
| M4947 | Neuropathic spondylopathy                                         |
| M4948 | Neuropathic spondylopathy                                         |
| M4949 | Neuropathic spondylopathy                                         |
| M495  | Collapsed vertebra in diseases classified elsewhere               |
| M4950 | Collapsed vertebra in diseases classified elsewhere               |
| M4951 | Collapsed vertebra in diseases classified elsewhere               |
| M4952 | Collapsed vertebra in diseases classified elsewhere               |
| M4953 | Collapsed vertebra in diseases classified elsewhere               |
| M4954 | Collapsed vertebra in diseases classified elsewhere               |
| M4955 | Collapsed vertebra in diseases classified elsewhere               |
| M4956 | Collapsed vertebra in diseases classified elsewhere               |
| M4957 | Collapsed vertebra in diseases classified elsewhere               |
| M4958 | Collapsed vertebra in diseases classified elsewhere               |
| M4959 | Collapsed vertebra in diseases classified elsewhere               |
| M498  | Spondylopathy in other diseases classified elsewhere              |
| M4980 | Spondylopathy in other diseases classified elsewhere              |
| M4981 | Spondylopathy in other diseases classified elsewhere              |
| M4982 | Spondylopathy in other diseases classified elsewhere              |
| M4983 | Spondylopathy in other diseases classified elsewhere              |
| M4984 | Spondylopathy in other diseases classified elsewhere              |
| M4985 | Spondylopathy in other diseases classified elsewhere              |
| M4986 | Spondylopathy in other diseases classified elsewhere              |
| M4987 | Spondylopathy in other diseases classified elsewhere              |
| M4988 | Spondylopathy in other diseases classified elsewhere              |
| M4989 | Spondylopathy in other diseases classified elsewhere              |
| M50   | Cervical disc disorders                                           |
| M500  | Cervical disc disorder with myelopathy                            |
| M501  | Cervical disc disorder with radiculopathy                         |
| M502  | Other cervical disc displacement                                  |
| M503  | Other cervical disc degeneration                                  |
| M508  | Other cervical disc disorders                                     |
| M509  | Cervical disc disorder, unspecified                               |
| M51   | Other intervertebral disc disorders                               |
| M510  | Lumbar and other intervertebral disc disorders with myelopathy    |
| M511  | Lumbar and other intervertebral disc disorders with radiculopathy |
| M512  | Other specified intervertebral disc displacement                  |
| M513  | Other specified intervertebral disc degeneration                  |
| M514  | Schmorl nodes                                                     |
| M514  | Schmorl's nodes                                                   |
| M518  | Other specified intervertebral disc disorders                     |
| M519  | Intervertebral disc disorder, unspecified                         |
| M53   | Other dorsopathies, not elsewhere classified                      |
| M530  | Cervicocranial syndrome                                           |

|       |                                                    |
|-------|----------------------------------------------------|
| M5300 | Cervicocranial syndrome                            |
| M5301 | Cervicocranial syndrome                            |
| M5302 | Cervicocranial syndrome                            |
| M5303 | Cervicocranial syndrome                            |
| M531  | Cervicobrachial syndrome                           |
| M5310 | Cervicobrachial syndrome                           |
| M5311 | Cervicobrachial syndrome                           |
| M5312 | Cervicobrachial syndrome                           |
| M5313 | Cervicobrachial syndrome                           |
| M532  | Spinal instabilities                               |
| M5320 | Spinal instabilities                               |
| M5321 | Spinal instabilities                               |
| M5322 | Spinal instabilities                               |
| M5323 | Spinal instabilities                               |
| M5324 | Spinal instabilities                               |
| M5325 | Spinal instabilities                               |
| M5326 | Spinal instabilities                               |
| M5327 | Spinal instabilities                               |
| M5328 | Spinal instabilities                               |
| M5329 | Spinal instabilities                               |
| M533  | Sacrococcygeal disorders, not elsewhere classified |
| M538  | Other specified dorsopathies                       |
| M5380 | Other specified dorsopathies                       |
| M5381 | Other specified dorsopathies                       |
| M5382 | Other specified dorsopathies                       |
| M5383 | Other specified dorsopathies                       |
| M5384 | Other specified dorsopathies                       |
| M5385 | Other specified dorsopathies                       |
| M5386 | Other specified dorsopathies                       |
| M5387 | Other specified dorsopathies                       |
| M5388 | Other specified dorsopathies                       |
| M5389 | Other specified dorsopathies                       |
| M539  | Dorsopathy, unspecified                            |
| M5390 | Dorsopathy, unspecified                            |
| M5391 | Dorsopathy, unspecified                            |
| M5392 | Dorsopathy, unspecified                            |
| M5393 | Dorsopathy, unspecified                            |
| M5394 | Dorsopathy, unspecified                            |
| M5395 | Dorsopathy, unspecified                            |
| M5396 | Dorsopathy, unspecified                            |
| M5397 | Dorsopathy, unspecified                            |
| M5398 | Dorsopathy, unspecified                            |
| M5399 | Dorsopathy, unspecified                            |
| M54   | Dorsalgia                                          |
| M540  | Panniculitis affecting regions of neck and back    |
| M5400 | Panniculitis affecting regions of neck and back    |
| M5401 | Panniculitis affecting regions of neck and back    |
| M5402 | Panniculitis affecting regions of neck and back    |

|       |                                                 |
|-------|-------------------------------------------------|
| M5403 | Panniculitis affecting regions of neck and back |
| M5404 | Panniculitis affecting regions of neck and back |
| M5405 | Panniculitis affecting regions of neck and back |
| M5406 | Panniculitis affecting regions of neck and back |
| M5407 | Panniculitis affecting regions of neck and back |
| M5408 | Panniculitis affecting regions of neck and back |
| M5409 | Panniculitis affecting regions of neck and back |
| M541  | Radiculopathy                                   |
| M5410 | Radiculopathy                                   |
| M5411 | Radiculopathy                                   |
| M5412 | Radiculopathy                                   |
| M5413 | Radiculopathy                                   |
| M5414 | Radiculopathy                                   |
| M5415 | Radiculopathy                                   |
| M5416 | Radiculopathy                                   |
| M5417 | Radiculopathy                                   |
| M5418 | Radiculopathy                                   |
| M5419 | Radiculopathy                                   |
| M542  | Cervicalgia                                     |
| M5421 | Cervicalgia                                     |
| M5422 | Cervicalgia                                     |
| M5423 | Cervicalgia                                     |
| M543  | Sciatica                                        |
| M5430 | Sciatica                                        |
| M5435 | Sciatica                                        |
| M5436 | Sciatica                                        |
| M5437 | Sciatica                                        |
| M5438 | Sciatica                                        |
| M5439 | Sciatica                                        |
| M544  | Lumbago with sciatica                           |
| M5440 | Lumbago with sciatica                           |
| M5445 | Lumbago with sciatica                           |
| M5446 | Lumbago with sciatica                           |
| M5447 | Lumbago with sciatica                           |
| M5448 | Lumbago with sciatica                           |
| M5449 | Lumbago with sciatica                           |
| M545  | Low back pain                                   |
| M5450 | Low back pain                                   |
| M5455 | Low back pain                                   |
| M5456 | Low back pain                                   |
| M5457 | Low back pain                                   |
| M5458 | Low back pain                                   |
| M5459 | Low back pain                                   |
| M546  | Pain in thoracic spine                          |
| M5460 | Pain in thoracic spine                          |
| M5463 | Pain in thoracic spine                          |
| M5464 | Pain in thoracic spine                          |
| M5465 | Pain in thoracic spine                          |

|       |                                                                 |
|-------|-----------------------------------------------------------------|
| M548  | Other dorsalgia                                                 |
| M5480 | Other dorsalgia                                                 |
| M5481 | Other dorsalgia                                                 |
| M5482 | Other dorsalgia                                                 |
| M5483 | Other dorsalgia                                                 |
| M5484 | Other dorsalgia                                                 |
| M5485 | Other dorsalgia                                                 |
| M5486 | Other dorsalgia                                                 |
| M5487 | Other dorsalgia                                                 |
| M5488 | Other dorsalgia                                                 |
| M5489 | Other dorsalgia                                                 |
| M549  | Dorsalgia, unspecified                                          |
| M5490 | Dorsalgia, unspecified                                          |
| M5491 | Dorsalgia, unspecified                                          |
| M5492 | Dorsalgia, unspecified                                          |
| M5493 | Dorsalgia, unspecified                                          |
| M5494 | Dorsalgia, unspecified                                          |
| M5495 | Dorsalgia, unspecified                                          |
| M5496 | Dorsalgia, unspecified                                          |
| M5497 | Dorsalgia, unspecified                                          |
| M5498 | Dorsalgia, unspecified                                          |
| M5499 | Dorsalgia, unspecified                                          |
| M60   | Myositis                                                        |
| M600  | Infective myositis                                              |
| M6000 | Infective myositis                                              |
| M6001 | Infective myositis                                              |
| M6002 | Infective myositis                                              |
| M6003 | Infective myositis                                              |
| M6004 | Infective myositis                                              |
| M6005 | Infective myositis                                              |
| M6006 | Infective myositis                                              |
| M6007 | Infective myositis                                              |
| M6008 | Infective myositis                                              |
| M6009 | Infective myositis                                              |
| M601  | Interstitial myositis                                           |
| M6010 | Interstitial myositis                                           |
| M6011 | Interstitial myositis                                           |
| M6012 | Interstitial myositis                                           |
| M6013 | Interstitial myositis                                           |
| M6014 | Interstitial myositis                                           |
| M6015 | Interstitial myositis                                           |
| M6016 | Interstitial myositis                                           |
| M6017 | Interstitial myositis                                           |
| M6018 | Interstitial myositis                                           |
| M6019 | Interstitial myositis                                           |
| M602  | Foreign body granuloma of soft tissue, not elsewhere classified |
| M6020 | Foreign body granuloma of soft tissue, not elsewhere classified |
| M6021 | Foreign body granuloma of soft tissue, not elsewhere classified |

|       |                                                                 |
|-------|-----------------------------------------------------------------|
| M6022 | Foreign body granuloma of soft tissue, not elsewhere classified |
| M6023 | Foreign body granuloma of soft tissue, not elsewhere classified |
| M6024 | Foreign body granuloma of soft tissue, not elsewhere classified |
| M6025 | Foreign body granuloma of soft tissue, not elsewhere classified |
| M6026 | Foreign body granuloma of soft tissue, not elsewhere classified |
| M6027 | Foreign body granuloma of soft tissue, not elsewhere classified |
| M6028 | Foreign body granuloma of soft tissue, not elsewhere classified |
| M6029 | Foreign body granuloma of soft tissue, not elsewhere classified |
| M608  | Other myositis                                                  |
| M6080 | Other myositis                                                  |
| M6081 | Other myositis                                                  |
| M6082 | Other myositis                                                  |
| M6083 | Other myositis                                                  |
| M6084 | Other myositis                                                  |
| M6085 | Other myositis                                                  |
| M6086 | Other myositis                                                  |
| M6087 | Other myositis                                                  |
| M6088 | Other myositis                                                  |
| M6089 | Other myositis                                                  |
| M609  | Myositis, unspecified                                           |
| M6090 | Myositis, unspecified                                           |
| M6091 | Myositis, unspecified                                           |
| M6092 | Myositis, unspecified                                           |
| M6093 | Myositis, unspecified                                           |
| M6094 | Myositis, unspecified                                           |
| M6095 | Myositis, unspecified                                           |
| M6096 | Myositis, unspecified                                           |
| M6097 | Myositis, unspecified                                           |
| M6098 | Myositis, unspecified                                           |
| M6099 | Myositis, unspecified                                           |
| M61   | Calcification and ossification of muscle                        |
| M610  | Myositis ossificans traumatica                                  |
| M6100 | Myositis ossificans traumatica                                  |
| M6101 | Myositis ossificans traumatica                                  |
| M6102 | Myositis ossificans traumatica                                  |
| M6103 | Myositis ossificans traumatica                                  |
| M6104 | Myositis ossificans traumatica                                  |
| M6105 | Myositis ossificans traumatica                                  |
| M6106 | Myositis ossificans traumatica                                  |
| M6107 | Myositis ossificans traumatica                                  |
| M6108 | Myositis ossificans traumatica                                  |
| M6109 | Myositis ossificans traumatica                                  |
| M611  | Myositis ossificans progressiva                                 |
| M6110 | Myositis ossificans progressiva                                 |
| M6111 | Myositis ossificans progressiva                                 |
| M6112 | Myositis ossificans progressiva                                 |
| M6113 | Myositis ossificans progressiva                                 |
| M6114 | Myositis ossificans progressiva                                 |

|       |                                                                 |
|-------|-----------------------------------------------------------------|
| M6115 | Myositis ossificans progressiva                                 |
| M6116 | Myositis ossificans progressiva                                 |
| M6117 | Myositis ossificans progressiva                                 |
| M6118 | Myositis ossificans progressiva                                 |
| M6119 | Myositis ossificans progressiva                                 |
| M612  | Paralytic calcification and ossification of muscle              |
| M6120 | Paralytic calcification and ossification of muscle              |
| M6121 | Paralytic calcification and ossification of muscle              |
| M6122 | Paralytic calcification and ossification of muscle              |
| M6123 | Paralytic calcification and ossification of muscle              |
| M6124 | Paralytic calcification and ossification of muscle              |
| M6125 | Paralytic calcification and ossification of muscle              |
| M6126 | Paralytic calcification and ossification of muscle              |
| M6127 | Paralytic calcification and ossification of muscle              |
| M6128 | Paralytic calcification and ossification of muscle              |
| M6129 | Paralytic calcification and ossification of muscle              |
| M613  | Calcification and ossification of muscles associated with burns |
| M6130 | Calcification and ossification of muscles associated with burns |
| M6131 | Calcification and ossification of muscles associated with burns |
| M6132 | Calcification and ossification of muscles associated with burns |
| M6133 | Calcification and ossification of muscles associated with burns |
| M6134 | Calcification and ossification of muscles associated with burns |
| M6135 | Calcification and ossification of muscles associated with burns |
| M6136 | Calcification and ossification of muscles associated with burns |
| M6137 | Calcification and ossification of muscles associated with burns |
| M6138 | Calcification and ossification of muscles associated with burns |
| M6139 | Calcification and ossification of muscles associated with burns |
| M614  | Other calcification of muscle                                   |
| M6140 | Other calcification of muscle                                   |
| M6141 | Other calcification of muscle                                   |
| M6142 | Other calcification of muscle                                   |
| M6143 | Other calcification of muscle                                   |
| M6144 | Other calcification of muscle                                   |
| M6145 | Other calcification of muscle                                   |
| M6146 | Other calcification of muscle                                   |
| M6147 | Other calcification of muscle                                   |
| M6148 | Other calcification of muscle                                   |
| M6149 | Other calcification of muscle                                   |
| M615  | Other ossification of muscle                                    |
| M6150 | Other ossification of muscle                                    |
| M6151 | Other ossification of muscle                                    |
| M6152 | Other ossification of muscle                                    |
| M6153 | Other ossification of muscle                                    |
| M6154 | Other ossification of muscle                                    |
| M6155 | Other ossification of muscle                                    |
| M6156 | Other ossification of muscle                                    |
| M6157 | Other ossification of muscle                                    |
| M6158 | Other ossification of muscle                                    |

|       |                                                       |
|-------|-------------------------------------------------------|
| M6159 | Other ossification of muscle                          |
| M619  | Calcification and ossification of muscle, unspecified |
| M6190 | Calcification and ossification of muscle, unspecified |
| M6191 | Calcification and ossification of muscle, unspecified |
| M6192 | Calcification and ossification of muscle, unspecified |
| M6193 | Calcification and ossification of muscle, unspecified |
| M6194 | Calcification and ossification of muscle, unspecified |
| M6195 | Calcification and ossification of muscle, unspecified |
| M6196 | Calcification and ossification of muscle, unspecified |
| M6197 | Calcification and ossification of muscle, unspecified |
| M6198 | Calcification and ossification of muscle, unspecified |
| M6199 | Calcification and ossification of muscle, unspecified |
| M62   | Other disorders of muscle                             |
| M620  | Diastasis of muscle                                   |
| M6200 | Diastasis of muscle                                   |
| M6201 | Diastasis of muscle                                   |
| M6202 | Diastasis of muscle                                   |
| M6203 | Diastasis of muscle                                   |
| M6204 | Diastasis of muscle                                   |
| M6205 | Diastasis of muscle                                   |
| M6206 | Diastasis of muscle                                   |
| M6207 | Diastasis of muscle                                   |
| M6208 | Diastasis of muscle                                   |
| M6209 | Diastasis of muscle                                   |
| M621  | Other rupture of muscle (nontraumatic)                |
| M6210 | Other rupture of muscle (nontraumatic)                |
| M6211 | Other rupture of muscle (nontraumatic)                |
| M6212 | Other rupture of muscle (nontraumatic)                |
| M6213 | Other rupture of muscle (nontraumatic)                |
| M6214 | Other rupture of muscle (nontraumatic)                |
| M6215 | Other rupture of muscle (nontraumatic)                |
| M6216 | Other rupture of muscle (nontraumatic)                |
| M6217 | Other rupture of muscle (nontraumatic)                |
| M6218 | Other rupture of muscle (nontraumatic)                |
| M6219 | Other rupture of muscle (nontraumatic)                |
| M622  | Ischaemic infarction of muscle                        |
| M6220 | Ischaemic infarction of muscle                        |
| M6221 | Ischaemic infarction of muscle                        |
| M6222 | Ischaemic infarction of muscle                        |
| M6223 | Ischaemic infarction of muscle                        |
| M6224 | Ischaemic infarction of muscle                        |
| M6225 | Ischaemic infarction of muscle                        |
| M6226 | Ischaemic infarction of muscle                        |
| M6227 | Ischaemic infarction of muscle                        |
| M6228 | Ischaemic infarction of muscle                        |
| M6229 | Ischaemic infarction of muscle                        |
| M623  | Immobility syndrome (paraplegic)                      |
| M6230 | Immobility syndrome (paraplegic)                      |



|       |                                                      |
|-------|------------------------------------------------------|
| M6231 | Immobility syndrome (paraplegic)                     |
| M6232 | Immobility syndrome (paraplegic)                     |
| M6233 | Immobility syndrome (paraplegic)                     |
| M6234 | Immobility syndrome (paraplegic)                     |
| M6235 | Immobility syndrome (paraplegic)                     |
| M6236 | Immobility syndrome (paraplegic)                     |
| M6237 | Immobility syndrome (paraplegic)                     |
| M6238 | Immobility syndrome (paraplegic)                     |
| M6239 | Immobility syndrome (paraplegic)                     |
| M624  | Contracture of muscle                                |
| M6240 | Contracture of muscle                                |
| M6241 | Contracture of muscle                                |
| M6242 | Contracture of muscle                                |
| M6243 | Contracture of muscle                                |
| M6244 | Contracture of muscle                                |
| M6245 | Contracture of muscle                                |
| M6246 | Contracture of muscle                                |
| M6247 | Contracture of muscle                                |
| M6248 | Contracture of muscle                                |
| M6249 | Contracture of muscle                                |
| M625  | Muscle wasting and atrophy, not elsewhere classified |
| M6250 | Muscle wasting and atrophy, not elsewhere classified |
| M6251 | Muscle wasting and atrophy, not elsewhere classified |
| M6252 | Muscle wasting and atrophy, not elsewhere classified |
| M6253 | Muscle wasting and atrophy, not elsewhere classified |
| M6254 | Muscle wasting and atrophy, not elsewhere classified |
| M6255 | Muscle wasting and atrophy, not elsewhere classified |
| M6256 | Muscle wasting and atrophy, not elsewhere classified |
| M6257 | Muscle wasting and atrophy, not elsewhere classified |
| M6258 | Muscle wasting and atrophy, not elsewhere classified |
| M6259 | Muscle wasting and atrophy, not elsewhere classified |
| M626  | Muscle strain                                        |
| M6260 | Muscle strain                                        |
| M6261 | Muscle strain                                        |
| M6262 | Muscle strain                                        |
| M6263 | Muscle strain                                        |
| M6264 | Muscle strain                                        |
| M6265 | Muscle strain                                        |
| M6266 | Muscle strain                                        |
| M6267 | Muscle strain                                        |
| M6268 | Muscle strain                                        |
| M6269 | Muscle strain                                        |
| M628  | Other specified disorders of muscle                  |
| M6280 | Other specified disorders of muscle                  |
| M6281 | Other specified disorders of muscle                  |
| M6282 | Other specified disorders of muscle                  |
| M6283 | Other specified disorders of muscle                  |
| M6284 | Other specified disorders of muscle                  |

|       |                                                                     |
|-------|---------------------------------------------------------------------|
| M6285 | Other specified disorders of muscle                                 |
| M6286 | Other specified disorders of muscle                                 |
| M6287 | Other specified disorders of muscle                                 |
| M6288 | Other specified disorders of muscle                                 |
| M6289 | Other specified disorders of muscle                                 |
| M629  | Disorder of muscle, unspecified                                     |
| M6290 | Disorder of muscle, unspecified                                     |
| M6291 | Disorder of muscle, unspecified                                     |
| M6292 | Disorder of muscle, unspecified                                     |
| M6293 | Disorder of muscle, unspecified                                     |
| M6294 | Disorder of muscle, unspecified                                     |
| M6295 | Disorder of muscle, unspecified                                     |
| M6296 | Disorder of muscle, unspecified                                     |
| M6297 | Disorder of muscle, unspecified                                     |
| M6298 | Disorder of muscle, unspecified                                     |
| M6299 | Disorder of muscle, unspecified                                     |
| M63   | Disorders of muscle in diseases classified elsewhere                |
| M630  | Myositis in bacterial diseases classified elsewhere                 |
| M631  | Myositis in protozoal and parasitic infections classified elsewhere |
| M632  | Myositis in other infectious diseases classified elsewhere          |
| M633  | Myositis in sarcoidosis                                             |
| M638  | Other disorders of muscle in diseases classified elsewhere          |
| M65   | Synovitis and tenosynovitis                                         |
| M650  | Abscess of tendon sheath                                            |
| M6500 | Abscess of tendon sheath                                            |
| M6501 | Abscess of tendon sheath                                            |
| M6502 | Abscess of tendon sheath                                            |
| M6503 | Abscess of tendon sheath                                            |
| M6504 | Abscess of tendon sheath                                            |
| M6505 | Abscess of tendon sheath                                            |
| M6506 | Abscess of tendon sheath                                            |
| M6507 | Abscess of tendon sheath                                            |
| M6508 | Abscess of tendon sheath                                            |
| M6509 | Abscess of tendon sheath                                            |
| M651  | Other infective (teno)synovitis                                     |
| M6510 | Other infective (teno)synovitis                                     |
| M6511 | Other infective (teno)synovitis                                     |
| M6512 | Other infective (teno)synovitis                                     |
| M6513 | Other infective (teno)synovitis                                     |
| M6514 | Other infective (teno)synovitis                                     |
| M6515 | Other infective (teno)synovitis                                     |
| M6516 | Other infective (teno)synovitis                                     |
| M6517 | Other infective (teno)synovitis                                     |
| M6518 | Other infective (teno)synovitis                                     |
| M6519 | Other infective (teno)synovitis                                     |
| M652  | Calcific tendinitis                                                 |
| M6520 | Calcific tendinitis                                                 |
| M6521 | Calcific tendinitis                                                 |

|       |                                            |
|-------|--------------------------------------------|
| M6522 | Calcific tendinitis                        |
| M6523 | Calcific tendinitis                        |
| M6524 | Calcific tendinitis                        |
| M6525 | Calcific tendinitis                        |
| M6526 | Calcific tendinitis                        |
| M6527 | Calcific tendinitis                        |
| M6528 | Calcific tendinitis                        |
| M6529 | Calcific tendinitis                        |
| M653  | Trigger finger                             |
| M654  | Radial styloid tenosynovitis [de Quervain] |
| M6540 | Radial styloid tenosynovitis [de Quervain] |
| M6543 | Radial styloid tenosynovitis [de Quervain] |
| M6544 | Radial styloid tenosynovitis [de Quervain] |
| M658  | Other synovitis and tenosynovitis          |
| M6580 | Other synovitis and tenosynovitis          |
| M6581 | Other synovitis and tenosynovitis          |
| M6582 | Other synovitis and tenosynovitis          |
| M6583 | Other synovitis and tenosynovitis          |
| M6584 | Other synovitis and tenosynovitis          |
| M6585 | Other synovitis and tenosynovitis          |
| M6586 | Other synovitis and tenosynovitis          |
| M6587 | Other synovitis and tenosynovitis          |
| M6588 | Other synovitis and tenosynovitis          |
| M6589 | Other synovitis and tenosynovitis          |
| M659  | Synovitis and tenosynovitis, unspecified   |
| M6590 | Synovitis and tenosynovitis, unspecified   |
| M6591 | Synovitis and tenosynovitis, unspecified   |
| M6592 | Synovitis and tenosynovitis, unspecified   |
| M6593 | Synovitis and tenosynovitis, unspecified   |
| M6594 | Synovitis and tenosynovitis, unspecified   |
| M6595 | Synovitis and tenosynovitis, unspecified   |
| M6596 | Synovitis and tenosynovitis, unspecified   |
| M6597 | Synovitis and tenosynovitis, unspecified   |
| M6598 | Synovitis and tenosynovitis, unspecified   |
| M6599 | Synovitis and tenosynovitis, unspecified   |
| M66   | Spontaneous rupture of synovium and tendon |
| M660  | Rupture of popliteal cyst                  |
| M661  | Rupture of synovium                        |
| M6610 | Rupture of synovium                        |
| M6611 | Rupture of synovium                        |
| M6612 | Rupture of synovium                        |
| M6613 | Rupture of synovium                        |
| M6614 | Rupture of synovium                        |
| M6615 | Rupture of synovium                        |
| M6616 | Rupture of synovium                        |
| M6617 | Rupture of synovium                        |
| M6618 | Rupture of synovium                        |
| M6619 | Rupture of synovium                        |

|       |                                                |
|-------|------------------------------------------------|
| M662  | Spontaneous rupture of extensor tendons        |
| M6620 | Spontaneous rupture of extensor tendons        |
| M6621 | Spontaneous rupture of extensor tendons        |
| M6622 | Spontaneous rupture of extensor tendons        |
| M6623 | Spontaneous rupture of extensor tendons        |
| M6624 | Spontaneous rupture of extensor tendons        |
| M6625 | Spontaneous rupture of extensor tendons        |
| M6626 | Spontaneous rupture of extensor tendons        |
| M6627 | Spontaneous rupture of extensor tendons        |
| M6629 | Spontaneous rupture of extensor tendons        |
| M663  | Spontaneous rupture of flexor tendons          |
| M6630 | Spontaneous rupture of flexor tendons          |
| M6631 | Spontaneous rupture of flexor tendons          |
| M6632 | Spontaneous rupture of flexor tendons          |
| M6633 | Spontaneous rupture of flexor tendons          |
| M6634 | Spontaneous rupture of flexor tendons          |
| M6635 | Spontaneous rupture of flexor tendons          |
| M6636 | Spontaneous rupture of flexor tendons          |
| M6637 | Spontaneous rupture of flexor tendons          |
| M6638 | Spontaneous rupture of flexor tendons          |
| M6639 | Spontaneous rupture of flexor tendons          |
| M664  | Spontaneous rupture of other tendons           |
| M6640 | Spontaneous rupture of other tendons           |
| M6641 | Spontaneous rupture of other tendons           |
| M6642 | Spontaneous rupture of other tendons           |
| M6643 | Spontaneous rupture of other tendons           |
| M6644 | Spontaneous rupture of other tendons           |
| M6645 | Spontaneous rupture of other tendons           |
| M6646 | Spontaneous rupture of other tendons           |
| M6647 | Spontaneous rupture of other tendons           |
| M6648 | Spontaneous rupture of other tendons           |
| M6649 | Spontaneous rupture of other tendons           |
| M665  | Spontaneous rupture of unspecified tendon      |
| M6650 | Spontaneous rupture of unspecified tendon      |
| M6651 | Spontaneous rupture of unspecified tendon      |
| M6652 | Spontaneous rupture of unspecified tendon      |
| M6653 | Spontaneous rupture of unspecified tendon      |
| M6654 | Spontaneous rupture of unspecified tendon      |
| M6655 | Spontaneous rupture of unspecified tendon      |
| M6656 | Spontaneous rupture of unspecified tendon      |
| M6657 | Spontaneous rupture of unspecified tendon      |
| M6658 | Spontaneous rupture of unspecified tendon      |
| M6659 | Spontaneous rupture of unspecified tendon      |
| M67   | Other disorders of synovium and tendon         |
| M670  | Short Achilles tendon (acquired)               |
| M671  | Other contracture of tendon (sheath)           |
| M672  | Synovial hypertrophy, not elsewhere classified |
| M673  | Transient synovitis                            |

|       |                                                                         |
|-------|-------------------------------------------------------------------------|
| M674  | Ganglion                                                                |
| M678  | Other specified disorders of synovium and tendon                        |
| M679  | Disorder of synovium and tendon, unspecified                            |
| M68   | Disorders of synovium and tendon in diseases classified elsewhere       |
| M680  | Synovitis and tenosynovitis in bacterial diseases classified elsewhere  |
| M688  | Other disorders of synovium and tendon in diseases classified elsewhere |
| M70   | Soft tissue disorders related to use, overuse and pressure              |
| M700  | Chronic crepitant synovitis of hand and wrist                           |
| M7000 | Chronic crepitant synovitis of hand and wrist                           |
| M7003 | Chronic crepitant synovitis of hand and wrist                           |
| M7004 | Chronic crepitant synovitis of hand and wrist                           |
| M701  | Bursitis of hand                                                        |
| M702  | Olecranon bursitis                                                      |
| M703  | Other bursitis of elbow                                                 |
| M704  | Prepatellar bursitis                                                    |
| M705  | Other bursitis of knee                                                  |
| M706  | Trochanteric bursitis                                                   |
| M707  | Other bursitis of hip                                                   |
| M708  | Other soft tissue disorders related to use, overuse and pressure        |
| M7080 | Other soft tissue disorders related to use, overuse and pressure        |
| M7081 | Other soft tissue disorders related to use, overuse and pressure        |
| M7082 | Other soft tissue disorders related to use, overuse and pressure        |
| M7083 | Other soft tissue disorders related to use, overuse and pressure        |
| M7084 | Other soft tissue disorders related to use, overuse and pressure        |
| M7085 | Other soft tissue disorders related to use, overuse and pressure        |
| M7086 | Other soft tissue disorders related to use, overuse and pressure        |
| M7087 | Other soft tissue disorders related to use, overuse and pressure        |
| M7088 | Other soft tissue disorders related to use, overuse and pressure        |
| M7089 | Other soft tissue disorders related to use, overuse and pressure        |
| M709  | Unspecified soft tissue disorder related to use, overuse and pressure   |
| M7090 | Unspecified soft tissue disorder related to use, overuse and pressure   |
| M7091 | Unspecified soft tissue disorder related to use, overuse and pressure   |
| M7092 | Unspecified soft tissue disorder related to use, overuse and pressure   |
| M7093 | Unspecified soft tissue disorder related to use, overuse and pressure   |
| M7094 | Unspecified soft tissue disorder related to use, overuse and pressure   |
| M7095 | Unspecified soft tissue disorder related to use, overuse and pressure   |
| M7096 | Unspecified soft tissue disorder related to use, overuse and pressure   |
| M7097 | Unspecified soft tissue disorder related to use, overuse and pressure   |
| M7098 | Unspecified soft tissue disorder related to use, overuse and pressure   |
| M7099 | Unspecified soft tissue disorder related to use, overuse and pressure   |
| M71   | Other bursopathies                                                      |
| M710  | Abscess of bursa                                                        |
| M7100 | Abscess of bursa                                                        |
| M7101 | Abscess of bursa                                                        |
| M7102 | Abscess of bursa                                                        |
| M7103 | Abscess of bursa                                                        |
| M7104 | Abscess of bursa                                                        |
| M7105 | Abscess of bursa                                                        |

|       |                                          |
|-------|------------------------------------------|
| M7106 | Abscess of bursa                         |
| M7107 | Abscess of bursa                         |
| M7108 | Abscess of bursa                         |
| M7109 | Abscess of bursa                         |
| M711  | Other infective bursitis                 |
| M7110 | Other infective bursitis                 |
| M7111 | Other infective bursitis                 |
| M7112 | Other infective bursitis                 |
| M7113 | Other infective bursitis                 |
| M7114 | Other infective bursitis                 |
| M7115 | Other infective bursitis                 |
| M7116 | Other infective bursitis                 |
| M7117 | Other infective bursitis                 |
| M7118 | Other infective bursitis                 |
| M7119 | Other infective bursitis                 |
| M712  | Synovial cyst of popliteal space [Baker] |
| M713  | Other bursal cyst                        |
| M7130 | Other bursal cyst                        |
| M7131 | Other bursal cyst                        |
| M7132 | Other bursal cyst                        |
| M7133 | Other bursal cyst                        |
| M7134 | Other bursal cyst                        |
| M7135 | Other bursal cyst                        |
| M7136 | Other bursal cyst                        |
| M7137 | Other bursal cyst                        |
| M7138 | Other bursal cyst                        |
| M7139 | Other bursal cyst                        |
| M714  | Calcium deposit in bursa                 |
| M7140 | Calcium deposit in bursa                 |
| M7141 | Calcium deposit in bursa                 |
| M7142 | Calcium deposit in bursa                 |
| M7143 | Calcium deposit in bursa                 |
| M7144 | Calcium deposit in bursa                 |
| M7145 | Calcium deposit in bursa                 |
| M7146 | Calcium deposit in bursa                 |
| M7147 | Calcium deposit in bursa                 |
| M7148 | Calcium deposit in bursa                 |
| M7149 | Calcium deposit in bursa                 |
| M715  | Other bursitis, not elsewhere classified |
| M7150 | Other bursitis, not elsewhere classified |
| M7151 | Other bursitis, not elsewhere classified |
| M7152 | Other bursitis, not elsewhere classified |
| M7153 | Other bursitis, not elsewhere classified |
| M7154 | Other bursitis, not elsewhere classified |
| M7155 | Other bursitis, not elsewhere classified |
| M7156 | Other bursitis, not elsewhere classified |
| M7157 | Other bursitis, not elsewhere classified |
| M7158 | Other bursitis, not elsewhere classified |

|       |                                          |
|-------|------------------------------------------|
| M7159 | Other bursitis, not elsewhere classified |
| M718  | Other specified bursopathies             |
| M7180 | Other specified bursopathies             |
| M7181 | Other specified bursopathies             |
| M7182 | Other specified bursopathies             |
| M7183 | Other specified bursopathies             |
| M7184 | Other specified bursopathies             |
| M7185 | Other specified bursopathies             |
| M7186 | Other specified bursopathies             |
| M7187 | Other specified bursopathies             |
| M7188 | Other specified bursopathies             |
| M7189 | Other specified bursopathies             |
| M719  | Bursopathy, unspecified                  |
| M7190 | Bursopathy, unspecified                  |
| M7191 | Bursopathy, unspecified                  |
| M7192 | Bursopathy, unspecified                  |
| M7193 | Bursopathy, unspecified                  |
| M7194 | Bursopathy, unspecified                  |
| M7195 | Bursopathy, unspecified                  |
| M7196 | Bursopathy, unspecified                  |
| M7197 | Bursopathy, unspecified                  |
| M7198 | Bursopathy, unspecified                  |
| M7199 | Bursopathy, unspecified                  |
| M72   | Fibroblastic disorders                   |
| M720  | Palmar fascial fibromatosis [Dupuytren]  |
| M721  | Knuckle pads                             |
| M7210 | Knuckle pads                             |
| M7214 | Knuckle pads                             |
| M7217 | Knuckle pads                             |
| M7219 | Knuckle pads                             |
| M722  | Plantar fascial fibromatosis             |
| M723  | Nodular fasciitis                        |
| M7230 | Nodular fasciitis                        |
| M7231 | Nodular fasciitis                        |
| M7232 | Nodular fasciitis                        |
| M7233 | Nodular fasciitis                        |
| M7234 | Nodular fasciitis                        |
| M7235 | Nodular fasciitis                        |
| M7236 | Nodular fasciitis                        |
| M7237 | Nodular fasciitis                        |
| M7238 | Nodular fasciitis                        |
| M724  | Pseudosarcomatous fibromatosis           |
| M7240 | Pseudosarcomatous fibromatosis           |
| M7241 | Pseudosarcomatous fibromatosis           |
| M7242 | Pseudosarcomatous fibromatosis           |
| M7243 | Pseudosarcomatous fibromatosis           |
| M7244 | Pseudosarcomatous fibromatosis           |
| M7245 | Pseudosarcomatous fibromatosis           |

|       |                                     |
|-------|-------------------------------------|
| M7246 | Pseudosarcomatous fibromatosis      |
| M7247 | Pseudosarcomatous fibromatosis      |
| M7248 | Pseudosarcomatous fibromatosis      |
| M7249 | Pseudosarcomatous fibromatosis      |
| M725  | Fasciitis, not elsewhere classified |
| M7250 | Fasciitis, not elsewhere classified |
| M7251 | Fasciitis, not elsewhere classified |
| M7252 | Fasciitis, not elsewhere classified |
| M7253 | Fasciitis, not elsewhere classified |
| M7254 | Fasciitis, not elsewhere classified |
| M7255 | Fasciitis, not elsewhere classified |
| M7256 | Fasciitis, not elsewhere classified |
| M7257 | Fasciitis, not elsewhere classified |
| M7258 | Fasciitis, not elsewhere classified |
| M7259 | Fasciitis, not elsewhere classified |
| M726  | Necrotizing fasciitis               |
| M7260 | Necrotizing fasciitis               |
| M7261 | Necrotizing fasciitis               |
| M7262 | Necrotizing fasciitis               |
| M7263 | Necrotizing fasciitis               |
| M7264 | Necrotizing fasciitis               |
| M7265 | Necrotizing fasciitis               |
| M7266 | Necrotizing fasciitis               |
| M7267 | Necrotizing fasciitis               |
| M7268 | Necrotizing fasciitis               |
| M7269 | Necrotizing fasciitis               |
| M728  | Other fibroblastic disorders        |
| M7280 | Other fibroblastic disorders        |
| M7281 | Other fibroblastic disorders        |
| M7282 | Other fibroblastic disorders        |
| M7283 | Other fibroblastic disorders        |
| M7284 | Other fibroblastic disorders        |
| M7285 | Other fibroblastic disorders        |
| M7286 | Other fibroblastic disorders        |
| M7287 | Other fibroblastic disorders        |
| M7288 | Other fibroblastic disorders        |
| M7289 | Other fibroblastic disorders        |
| M729  | Fibroblastic disorder, unspecified  |
| M7290 | Fibroblastic disorder, unspecified  |
| M7291 | Fibroblastic disorder, unspecified  |
| M7292 | Fibroblastic disorder, unspecified  |
| M7293 | Fibroblastic disorder, unspecified  |
| M7294 | Fibroblastic disorder, unspecified  |
| M7295 | Fibroblastic disorder, unspecified  |
| M7296 | Fibroblastic disorder, unspecified  |
| M7297 | Fibroblastic disorder, unspecified  |
| M7298 | Fibroblastic disorder, unspecified  |
| M7299 | Fibroblastic disorder, unspecified  |



|       |                                                              |
|-------|--------------------------------------------------------------|
| M73   | Soft tissue disorders in diseases classified elsewhere       |
| M730  | Gonococcal bursitis                                          |
| M7300 | Gonococcal bursitis                                          |
| M7301 | Gonococcal bursitis                                          |
| M7302 | Gonococcal bursitis                                          |
| M7303 | Gonococcal bursitis                                          |
| M7304 | Gonococcal bursitis                                          |
| M7305 | Gonococcal bursitis                                          |
| M7306 | Gonococcal bursitis                                          |
| M7307 | Gonococcal bursitis                                          |
| M7308 | Gonococcal bursitis                                          |
| M7309 | Gonococcal bursitis                                          |
| M731  | Syphilitic bursitis                                          |
| M7310 | Syphilitic bursitis                                          |
| M7311 | Syphilitic bursitis                                          |
| M7312 | Syphilitic bursitis                                          |
| M7313 | Syphilitic bursitis                                          |
| M7314 | Syphilitic bursitis                                          |
| M7315 | Syphilitic bursitis                                          |
| M7316 | Syphilitic bursitis                                          |
| M7317 | Syphilitic bursitis                                          |
| M7318 | Syphilitic bursitis                                          |
| M7319 | Syphilitic bursitis                                          |
| M738  | Other soft tissue disorders in diseases classified elsewhere |
| M7380 | Other soft tissue disorders in diseases classified elsewhere |
| M7381 | Other soft tissue disorders in diseases classified elsewhere |
| M7382 | Other soft tissue disorders in diseases classified elsewhere |
| M7383 | Other soft tissue disorders in diseases classified elsewhere |
| M7384 | Other soft tissue disorders in diseases classified elsewhere |
| M7385 | Other soft tissue disorders in diseases classified elsewhere |
| M7386 | Other soft tissue disorders in diseases classified elsewhere |
| M7387 | Other soft tissue disorders in diseases classified elsewhere |
| M7388 | Other soft tissue disorders in diseases classified elsewhere |
| M7389 | Other soft tissue disorders in diseases classified elsewhere |
| M75   | Shoulder lesions                                             |
| M750  | Adhesive capsulitis of shoulder                              |
| M751  | Rotator cuff syndrome                                        |
| M752  | Bicipital tendinitis                                         |
| M753  | Calcific tendinitis of shoulder                              |
| M754  | Impingement syndrome of shoulder                             |
| M755  | Bursitis of shoulder                                         |
| M758  | Other shoulder lesions                                       |
| M759  | Shoulder lesion, unspecified                                 |
| M76   | Enthesopathies of lower limb, excluding foot                 |
| M760  | Gluteal tendinitis                                           |
| M7600 | Gluteal tendinitis                                           |
| M7605 | Gluteal tendinitis                                           |
| M761  | Psoas tendinitis                                             |

|       |                                                    |
|-------|----------------------------------------------------|
| M7610 | Psoas tendinitis                                   |
| M7615 | Psoas tendinitis                                   |
| M762  | Iliac crest spur                                   |
| M763  | Iliotibial band syndrome                           |
| M7630 | Iliotibial band syndrome                           |
| M7635 | Iliotibial band syndrome                           |
| M7636 | Iliotibial band syndrome                           |
| M764  | Tibial collateral bursitis [Pellegrini-Stieda]     |
| M765  | Patellar tendinitis                                |
| M766  | Achilles tendinitis                                |
| M7660 | Achilles tendinitis                                |
| M7666 | Achilles tendinitis                                |
| M7667 | Achilles tendinitis                                |
| M767  | Peroneal tendinitis                                |
| M7670 | Peroneal tendinitis                                |
| M7676 | Peroneal tendinitis                                |
| M7677 | Peroneal tendinitis                                |
| M768  | Other enthesopathies of lower limb, excluding foot |
| M7680 | Other enthesopathies of lower limb, excluding foot |
| M7685 | Other enthesopathies of lower limb, excluding foot |
| M7686 | Other enthesopathies of lower limb, excluding foot |
| M7687 | Other enthesopathies of lower limb, excluding foot |
| M769  | Enthesopathy of lower limb, unspecified            |
| M7690 | Enthesopathy of lower limb, unspecified            |
| M7695 | Enthesopathy of lower limb, unspecified            |
| M7696 | Enthesopathy of lower limb, unspecified            |
| M7697 | Enthesopathy of lower limb, unspecified            |
| M7698 | Enthesopathy of lower limb, unspecified            |
| M7699 | Enthesopathy of lower limb, unspecified            |
| M77   | Other enthesopathies                               |
| M770  | Medial epicondylitis                               |
| M7700 | Medial epicondylitis                               |
| M7702 | Medial epicondylitis                               |
| M7705 | Medial epicondylitis                               |
| M7706 | Medial epicondylitis                               |
| M7709 | Medial epicondylitis                               |
| M771  | Lateral epicondylitis                              |
| M7710 | Lateral epicondylitis                              |
| M7712 | Lateral epicondylitis                              |
| M7715 | Lateral epicondylitis                              |
| M7716 | Lateral epicondylitis                              |
| M7719 | Lateral epicondylitis                              |
| M772  | Periarthritis of wrist                             |
| M773  | Calcaneal spur                                     |
| M774  | Metatarsalgia                                      |
| M775  | Other enthesopathy of foot                         |
| M778  | Other enthesopathies, not elsewhere classified     |
| M7780 | Other enthesopathies, not elsewhere classified     |

|       |                                                       |
|-------|-------------------------------------------------------|
| M7781 | Other enthesopathies, not elsewhere classified        |
| M7782 | Other enthesopathies, not elsewhere classified        |
| M7783 | Other enthesopathies, not elsewhere classified        |
| M7784 | Other enthesopathies, not elsewhere classified        |
| M7785 | Other enthesopathies, not elsewhere classified        |
| M7786 | Other enthesopathies, not elsewhere classified        |
| M7787 | Other enthesopathies, not elsewhere classified        |
| M7788 | Other enthesopathies, not elsewhere classified        |
| M7789 | Other enthesopathies, not elsewhere classified        |
| M779  | Enthesopathy, unspecified                             |
| M7790 | Enthesopathy, unspecified                             |
| M7791 | Enthesopathy, unspecified                             |
| M7792 | Enthesopathy, unspecified                             |
| M7793 | Enthesopathy, unspecified                             |
| M7794 | Enthesopathy, unspecified                             |
| M7795 | Enthesopathy, unspecified                             |
| M7796 | Enthesopathy, unspecified                             |
| M7797 | Enthesopathy, unspecified                             |
| M7798 | Enthesopathy, unspecified                             |
| M7799 | Enthesopathy, unspecified                             |
| M79   | Other soft tissue disorders, not elsewhere classified |
| M790  | Rheumatism, unspecified                               |
| M7900 | Rheumatism, unspecified                               |
| M7901 | Rheumatism, unspecified                               |
| M7902 | Rheumatism, unspecified                               |
| M7903 | Rheumatism, unspecified                               |
| M7904 | Rheumatism, unspecified                               |
| M7905 | Rheumatism, unspecified                               |
| M7906 | Rheumatism, unspecified                               |
| M7907 | Rheumatism, unspecified                               |
| M7908 | Rheumatism, unspecified                               |
| M7909 | Rheumatism, unspecified                               |
| M791  | Myalgia                                               |
| M7910 | Myalgia                                               |
| M7911 | Myalgia                                               |
| M7912 | Myalgia                                               |
| M7913 | Myalgia                                               |
| M7914 | Myalgia                                               |
| M7915 | Myalgia                                               |
| M7916 | Myalgia                                               |
| M7917 | Myalgia                                               |
| M7918 | Myalgia                                               |
| M7919 | Myalgia                                               |
| M792  | Neuralgia and neuritis, unspecified                   |
| M7920 | Neuralgia and neuritis, unspecified                   |
| M7921 | Neuralgia and neuritis, unspecified                   |
| M7922 | Neuralgia and neuritis, unspecified                   |
| M7923 | Neuralgia and neuritis, unspecified                   |

|       |                                        |
|-------|----------------------------------------|
| M7924 | Neuralgia and neuritis, unspecified    |
| M7925 | Neuralgia and neuritis, unspecified    |
| M7926 | Neuralgia and neuritis, unspecified    |
| M7927 | Neuralgia and neuritis, unspecified    |
| M7928 | Neuralgia and neuritis, unspecified    |
| M7929 | Neuralgia and neuritis, unspecified    |
| M793  | Panniculitis, unspecified              |
| M7930 | Panniculitis, unspecified              |
| M7931 | Panniculitis, unspecified              |
| M7932 | Panniculitis, unspecified              |
| M7933 | Panniculitis, unspecified              |
| M7934 | Panniculitis, unspecified              |
| M7935 | Panniculitis, unspecified              |
| M7936 | Panniculitis, unspecified              |
| M7937 | Panniculitis, unspecified              |
| M7938 | Panniculitis, unspecified              |
| M7939 | Panniculitis, unspecified              |
| M794  | Hypertrophy of (infrapatellar) fat pad |
| M7940 | Hypertrophy of (infrapatellar) fat pad |
| M7941 | Hypertrophy of (infrapatellar) fat pad |
| M7942 | Hypertrophy of (infrapatellar) fat pad |
| M7943 | Hypertrophy of (infrapatellar) fat pad |
| M7944 | Hypertrophy of (infrapatellar) fat pad |
| M7945 | Hypertrophy of (infrapatellar) fat pad |
| M7946 | Hypertrophy of (infrapatellar) fat pad |
| M7947 | Hypertrophy of (infrapatellar) fat pad |
| M7948 | Hypertrophy of (infrapatellar) fat pad |
| M795  | Residual foreign body in soft tissue   |
| M7950 | Residual foreign body in soft tissue   |
| M7951 | Residual foreign body in soft tissue   |
| M7952 | Residual foreign body in soft tissue   |
| M7953 | Residual foreign body in soft tissue   |
| M7954 | Residual foreign body in soft tissue   |
| M7955 | Residual foreign body in soft tissue   |
| M7956 | Residual foreign body in soft tissue   |
| M7957 | Residual foreign body in soft tissue   |
| M7958 | Residual foreign body in soft tissue   |
| M7959 | Residual foreign body in soft tissue   |
| M796  | Pain in limb                           |
| M7960 | Pain in limb                           |
| M7961 | Pain in limb                           |
| M7962 | Pain in limb                           |
| M7963 | Pain in limb                           |
| M7964 | Pain in limb                           |
| M7965 | Pain in limb                           |
| M7966 | Pain in limb                           |
| M7967 | Pain in limb                           |
| M7968 | Pain in limb                           |

|       |                                                         |
|-------|---------------------------------------------------------|
| M7969 | Pain in limb                                            |
| M797  | Fibromyalgia                                            |
| M7970 | Fibromyalgia                                            |
| M7971 | Fibromyalgia                                            |
| M7972 | Fibromyalgia                                            |
| M7973 | Fibromyalgia                                            |
| M7974 | Fibromyalgia                                            |
| M7975 | Fibromyalgia                                            |
| M7976 | Fibromyalgia                                            |
| M7977 | Fibromyalgia                                            |
| M7978 | Fibromyalgia                                            |
| M7979 | Fibromyalgia                                            |
| M798  | Other specified soft tissue disorders                   |
| M7980 | Other specified soft tissue disorders                   |
| M7981 | Other specified soft tissue disorders                   |
| M7982 | Other specified soft tissue disorders                   |
| M7983 | Other specified soft tissue disorders                   |
| M7984 | Other specified soft tissue disorders                   |
| M7985 | Other specified soft tissue disorders                   |
| M7986 | Other specified soft tissue disorders                   |
| M7987 | Other specified soft tissue disorders                   |
| M7988 | Other specified soft tissue disorders                   |
| M7989 | Other specified soft tissue disorders                   |
| M799  | Soft tissue disorder, unspecified                       |
| M7990 | Soft tissue disorder, unspecified                       |
| M7991 | Soft tissue disorder, unspecified                       |
| M7992 | Soft tissue disorder, unspecified                       |
| M7993 | Soft tissue disorder, unspecified                       |
| M7994 | Soft tissue disorder, unspecified                       |
| M7995 | Soft tissue disorder, unspecified                       |
| M7996 | Soft tissue disorder, unspecified                       |
| M7997 | Soft tissue disorder, unspecified                       |
| M7998 | Soft tissue disorder, unspecified                       |
| M7999 | Soft tissue disorder, unspecified                       |
| M80   | Osteoporosis with pathological fracture                 |
| M800  | Postmenopausal osteoporosis with pathological fracture  |
| M8000 | Postmenopausal osteoporosis with pathological fracture  |
| M8001 | Postmenopausal osteoporosis with pathological fracture  |
| M8002 | Postmenopausal osteoporosis with pathological fracture  |
| M8003 | Postmenopausal osteoporosis with pathological fracture  |
| M8004 | Postmenopausal osteoporosis with pathological fracture  |
| M8005 | Postmenopausal osteoporosis with pathological fracture  |
| M8006 | Postmenopausal osteoporosis with pathological fracture  |
| M8007 | Postmenopausal osteoporosis with pathological fracture  |
| M8008 | Postmenopausal osteoporosis with pathological fracture  |
| M8009 | Postmenopausal osteoporosis with pathological fracture  |
| M801  | Postophorectomy osteoporosis with pathological fracture |
| M8010 | Postophorectomy osteoporosis with pathological fracture |

|       |                                                                    |
|-------|--------------------------------------------------------------------|
| M8011 | Postoophorectomy osteoporosis with pathological fracture           |
| M8012 | Postoophorectomy osteoporosis with pathological fracture           |
| M8013 | Postoophorectomy osteoporosis with pathological fracture           |
| M8014 | Postoophorectomy osteoporosis with pathological fracture           |
| M8015 | Postoophorectomy osteoporosis with pathological fracture           |
| M8016 | Postoophorectomy osteoporosis with pathological fracture           |
| M8017 | Postoophorectomy osteoporosis with pathological fracture           |
| M8018 | Postoophorectomy osteoporosis with pathological fracture           |
| M8019 | Postoophorectomy osteoporosis with pathological fracture           |
| M802  | Osteoporosis of disuse with pathological fracture                  |
| M8020 | Osteoporosis of disuse with pathological fracture                  |
| M8021 | Osteoporosis of disuse with pathological fracture                  |
| M8022 | Osteoporosis of disuse with pathological fracture                  |
| M8023 | Osteoporosis of disuse with pathological fracture                  |
| M8024 | Osteoporosis of disuse with pathological fracture                  |
| M8025 | Osteoporosis of disuse with pathological fracture                  |
| M8026 | Osteoporosis of disuse with pathological fracture                  |
| M8027 | Osteoporosis of disuse with pathological fracture                  |
| M8028 | Osteoporosis of disuse with pathological fracture                  |
| M8029 | Osteoporosis of disuse with pathological fracture                  |
| M803  | Postsurgical malabsorption osteoporosis with pathological fracture |
| M8030 | Postsurgical malabsorption osteoporosis with pathological fracture |
| M8031 | Postsurgical malabsorption osteoporosis with pathological fracture |
| M8032 | Postsurgical malabsorption osteoporosis with pathological fracture |
| M8033 | Postsurgical malabsorption osteoporosis with pathological fracture |
| M8034 | Postsurgical malabsorption osteoporosis with pathological fracture |
| M8035 | Postsurgical malabsorption osteoporosis with pathological fracture |
| M8036 | Postsurgical malabsorption osteoporosis with pathological fracture |
| M8037 | Postsurgical malabsorption osteoporosis with pathological fracture |
| M8038 | Postsurgical malabsorption osteoporosis with pathological fracture |
| M8039 | Postsurgical malabsorption osteoporosis with pathological fracture |
| M804  | Drug-induced osteoporosis with pathological fracture               |
| M8040 | Drug-induced osteoporosis with pathological fracture               |
| M8041 | Drug-induced osteoporosis with pathological fracture               |
| M8042 | Drug-induced osteoporosis with pathological fracture               |
| M8043 | Drug-induced osteoporosis with pathological fracture               |
| M8044 | Drug-induced osteoporosis with pathological fracture               |
| M8045 | Drug-induced osteoporosis with pathological fracture               |
| M8046 | Drug-induced osteoporosis with pathological fracture               |
| M8047 | Drug-induced osteoporosis with pathological fracture               |
| M8048 | Drug-induced osteoporosis with pathological fracture               |
| M8049 | Drug-induced osteoporosis with pathological fracture               |
| M805  | Idiopathic osteoporosis with pathological fracture                 |
| M8050 | Idiopathic osteoporosis with pathological fracture                 |
| M8051 | Idiopathic osteoporosis with pathological fracture                 |
| M8052 | Idiopathic osteoporosis with pathological fracture                 |
| M8053 | Idiopathic osteoporosis with pathological fracture                 |
| M8054 | Idiopathic osteoporosis with pathological fracture                 |

|       |                                                     |
|-------|-----------------------------------------------------|
| M8055 | Idiopathic osteoporosis with pathological fracture  |
| M8056 | Idiopathic osteoporosis with pathological fracture  |
| M8057 | Idiopathic osteoporosis with pathological fracture  |
| M8058 | Idiopathic osteoporosis with pathological fracture  |
| M8059 | Idiopathic osteoporosis with pathological fracture  |
| M808  | Other osteoporosis with pathological fracture       |
| M8080 | Other osteoporosis with pathological fracture       |
| M8081 | Other osteoporosis with pathological fracture       |
| M8082 | Other osteoporosis with pathological fracture       |
| M8083 | Other osteoporosis with pathological fracture       |
| M8084 | Other osteoporosis with pathological fracture       |
| M8085 | Other osteoporosis with pathological fracture       |
| M8086 | Other osteoporosis with pathological fracture       |
| M8087 | Other osteoporosis with pathological fracture       |
| M8088 | Other osteoporosis with pathological fracture       |
| M8089 | Other osteoporosis with pathological fracture       |
| M809  | Unspecified osteoporosis with pathological fracture |
| M8090 | Unspecified osteoporosis with pathological fracture |
| M8091 | Unspecified osteoporosis with pathological fracture |
| M8092 | Unspecified osteoporosis with pathological fracture |
| M8093 | Unspecified osteoporosis with pathological fracture |
| M8094 | Unspecified osteoporosis with pathological fracture |
| M8095 | Unspecified osteoporosis with pathological fracture |
| M8096 | Unspecified osteoporosis with pathological fracture |
| M8097 | Unspecified osteoporosis with pathological fracture |
| M8098 | Unspecified osteoporosis with pathological fracture |
| M8099 | Unspecified osteoporosis with pathological fracture |
| M81   | Osteoporosis without pathological fracture          |
| M810  | Postmenopausal osteoporosis                         |
| M8100 | Postmenopausal osteoporosis                         |
| M8101 | Postmenopausal osteoporosis                         |
| M8102 | Postmenopausal osteoporosis                         |
| M8103 | Postmenopausal osteoporosis                         |
| M8104 | Postmenopausal osteoporosis                         |
| M8105 | Postmenopausal osteoporosis                         |
| M8106 | Postmenopausal osteoporosis                         |
| M8107 | Postmenopausal osteoporosis                         |
| M8108 | Postmenopausal osteoporosis                         |
| M8109 | Postmenopausal osteoporosis                         |
| M811  | Postoophorectomy osteoporosis                       |
| M8110 | Postoophorectomy osteoporosis                       |
| M8111 | Postoophorectomy osteoporosis                       |
| M8112 | Postoophorectomy osteoporosis                       |
| M8113 | Postoophorectomy osteoporosis                       |
| M8114 | Postoophorectomy osteoporosis                       |
| M8115 | Postoophorectomy osteoporosis                       |
| M8116 | Postoophorectomy osteoporosis                       |
| M8117 | Postoophorectomy osteoporosis                       |

|       |                                         |
|-------|-----------------------------------------|
| M8118 | Postoophorectomy osteoporosis           |
| M8119 | Postoophorectomy osteoporosis           |
| M812  | Osteoporosis of disuse                  |
| M8120 | Osteoporosis of disuse                  |
| M8121 | Osteoporosis of disuse                  |
| M8122 | Osteoporosis of disuse                  |
| M8123 | Osteoporosis of disuse                  |
| M8124 | Osteoporosis of disuse                  |
| M8125 | Osteoporosis of disuse                  |
| M8126 | Osteoporosis of disuse                  |
| M8127 | Osteoporosis of disuse                  |
| M8128 | Osteoporosis of disuse                  |
| M8129 | Osteoporosis of disuse                  |
| M813  | Postsurgical malabsorption osteoporosis |
| M8130 | Postsurgical malabsorption osteoporosis |
| M8131 | Postsurgical malabsorption osteoporosis |
| M8132 | Postsurgical malabsorption osteoporosis |
| M8133 | Postsurgical malabsorption osteoporosis |
| M8134 | Postsurgical malabsorption osteoporosis |
| M8135 | Postsurgical malabsorption osteoporosis |
| M8136 | Postsurgical malabsorption osteoporosis |
| M8137 | Postsurgical malabsorption osteoporosis |
| M8138 | Postsurgical malabsorption osteoporosis |
| M8139 | Postsurgical malabsorption osteoporosis |
| M814  | Drug-induced osteoporosis               |
| M8140 | Drug-induced osteoporosis               |
| M8141 | Drug-induced osteoporosis               |
| M8142 | Drug-induced osteoporosis               |
| M8143 | Drug-induced osteoporosis               |
| M8144 | Drug-induced osteoporosis               |
| M8145 | Drug-induced osteoporosis               |
| M8146 | Drug-induced osteoporosis               |
| M8147 | Drug-induced osteoporosis               |
| M8148 | Drug-induced osteoporosis               |
| M8149 | Drug-induced osteoporosis               |
| M815  | Idiopathic osteoporosis                 |
| M8150 | Idiopathic osteoporosis                 |
| M8151 | Idiopathic osteoporosis                 |
| M8152 | Idiopathic osteoporosis                 |
| M8153 | Idiopathic osteoporosis                 |
| M8154 | Idiopathic osteoporosis                 |
| M8155 | Idiopathic osteoporosis                 |
| M8156 | Idiopathic osteoporosis                 |
| M8157 | Idiopathic osteoporosis                 |
| M8158 | Idiopathic osteoporosis                 |
| M8159 | Idiopathic osteoporosis                 |
| M816  | Localized osteoporosis [Lequesne]       |
| M8160 | Localized osteoporosis [Lequesne]       |



|       |                                               |
|-------|-----------------------------------------------|
| M8161 | Localized osteoporosis [Lequesne]             |
| M8162 | Localized osteoporosis [Lequesne]             |
| M8163 | Localized osteoporosis [Lequesne]             |
| M8164 | Localized osteoporosis [Lequesne]             |
| M8165 | Localized osteoporosis [Lequesne]             |
| M8166 | Localized osteoporosis [Lequesne]             |
| M8167 | Localized osteoporosis [Lequesne]             |
| M8168 | Localized osteoporosis [Lequesne]             |
| M8169 | Localized osteoporosis [Lequesne]             |
| M818  | Other osteoporosis                            |
| M8180 | Other osteoporosis                            |
| M8181 | Other osteoporosis                            |
| M8182 | Other osteoporosis                            |
| M8183 | Other osteoporosis                            |
| M8184 | Other osteoporosis                            |
| M8185 | Other osteoporosis                            |
| M8186 | Other osteoporosis                            |
| M8187 | Other osteoporosis                            |
| M8188 | Other osteoporosis                            |
| M8189 | Other osteoporosis                            |
| M819  | Osteoporosis, unspecified                     |
| M8190 | Osteoporosis, unspecified                     |
| M8191 | Osteoporosis, unspecified                     |
| M8192 | Osteoporosis, unspecified                     |
| M8193 | Osteoporosis, unspecified                     |
| M8194 | Osteoporosis, unspecified                     |
| M8195 | Osteoporosis, unspecified                     |
| M8196 | Osteoporosis, unspecified                     |
| M8197 | Osteoporosis, unspecified                     |
| M8198 | Osteoporosis, unspecified                     |
| M8199 | Osteoporosis, unspecified                     |
| M82   | Osteoporosis in diseases classified elsewhere |
| M820  | Osteoporosis in multiple myelomatosis         |
| M8200 | Osteoporosis in multiple myelomatosis         |
| M8201 | Osteoporosis in multiple myelomatosis         |
| M8202 | Osteoporosis in multiple myelomatosis         |
| M8203 | Osteoporosis in multiple myelomatosis         |
| M8204 | Osteoporosis in multiple myelomatosis         |
| M8205 | Osteoporosis in multiple myelomatosis         |
| M8206 | Osteoporosis in multiple myelomatosis         |
| M8207 | Osteoporosis in multiple myelomatosis         |
| M8208 | Osteoporosis in multiple myelomatosis         |
| M8209 | Osteoporosis in multiple myelomatosis         |
| M821  | Osteoporosis in endocrine disorders           |
| M8210 | Osteoporosis in endocrine disorders           |
| M8211 | Osteoporosis in endocrine disorders           |
| M8212 | Osteoporosis in endocrine disorders           |
| M8213 | Osteoporosis in endocrine disorders           |

|       |                                                     |
|-------|-----------------------------------------------------|
| M8214 | Osteoporosis in endocrine disorders                 |
| M8215 | Osteoporosis in endocrine disorders                 |
| M8216 | Osteoporosis in endocrine disorders                 |
| M8217 | Osteoporosis in endocrine disorders                 |
| M8218 | Osteoporosis in endocrine disorders                 |
| M8219 | Osteoporosis in endocrine disorders                 |
| M828  | Osteoporosis in other diseases classified elsewhere |
| M8280 | Osteoporosis in other diseases classified elsewhere |
| M8281 | Osteoporosis in other diseases classified elsewhere |
| M8282 | Osteoporosis in other diseases classified elsewhere |
| M8283 | Osteoporosis in other diseases classified elsewhere |
| M8284 | Osteoporosis in other diseases classified elsewhere |
| M8285 | Osteoporosis in other diseases classified elsewhere |
| M8286 | Osteoporosis in other diseases classified elsewhere |
| M8287 | Osteoporosis in other diseases classified elsewhere |
| M8288 | Osteoporosis in other diseases classified elsewhere |
| M8289 | Osteoporosis in other diseases classified elsewhere |
| M83   | Adult osteomalacia                                  |
| M830  | Puerperal osteomalacia                              |
| M8300 | Puerperal osteomalacia                              |
| M8301 | Puerperal osteomalacia                              |
| M8302 | Puerperal osteomalacia                              |
| M8303 | Puerperal osteomalacia                              |
| M8304 | Puerperal osteomalacia                              |
| M8305 | Puerperal osteomalacia                              |
| M8306 | Puerperal osteomalacia                              |
| M8307 | Puerperal osteomalacia                              |
| M8308 | Puerperal osteomalacia                              |
| M8309 | Puerperal osteomalacia                              |
| M831  | Senile osteomalacia                                 |
| M8310 | Senile osteomalacia                                 |
| M8311 | Senile osteomalacia                                 |
| M8312 | Senile osteomalacia                                 |
| M8313 | Senile osteomalacia                                 |
| M8314 | Senile osteomalacia                                 |
| M8315 | Senile osteomalacia                                 |
| M8316 | Senile osteomalacia                                 |
| M8317 | Senile osteomalacia                                 |
| M8318 | Senile osteomalacia                                 |
| M8319 | Senile osteomalacia                                 |
| M832  | Adult osteomalacia due to malabsorption             |
| M8320 | Adult osteomalacia due to malabsorption             |
| M8321 | Adult osteomalacia due to malabsorption             |
| M8322 | Adult osteomalacia due to malabsorption             |
| M8323 | Adult osteomalacia due to malabsorption             |
| M8324 | Adult osteomalacia due to malabsorption             |
| M8325 | Adult osteomalacia due to malabsorption             |
| M8326 | Adult osteomalacia due to malabsorption             |

|       |                                           |
|-------|-------------------------------------------|
| M8327 | Adult osteomalacia due to malabsorption   |
| M8328 | Adult osteomalacia due to malabsorption   |
| M8329 | Adult osteomalacia due to malabsorption   |
| M833  | Adult osteomalacia due to malnutrition    |
| M8330 | Adult osteomalacia due to malnutrition    |
| M8331 | Adult osteomalacia due to malnutrition    |
| M8332 | Adult osteomalacia due to malnutrition    |
| M8333 | Adult osteomalacia due to malnutrition    |
| M8334 | Adult osteomalacia due to malnutrition    |
| M8335 | Adult osteomalacia due to malnutrition    |
| M8336 | Adult osteomalacia due to malnutrition    |
| M8337 | Adult osteomalacia due to malnutrition    |
| M8338 | Adult osteomalacia due to malnutrition    |
| M8339 | Adult osteomalacia due to malnutrition    |
| M834  | Aluminium bone disease                    |
| M8340 | Aluminium bone disease                    |
| M8341 | Aluminium bone disease                    |
| M8342 | Aluminium bone disease                    |
| M8343 | Aluminium bone disease                    |
| M8344 | Aluminium bone disease                    |
| M8345 | Aluminium bone disease                    |
| M8346 | Aluminium bone disease                    |
| M8347 | Aluminium bone disease                    |
| M8348 | Aluminium bone disease                    |
| M8349 | Aluminium bone disease                    |
| M835  | Other drug-induced osteomalacia in adults |
| M8350 | Other drug-induced osteomalacia in adults |
| M8351 | Other drug-induced osteomalacia in adults |
| M8352 | Other drug-induced osteomalacia in adults |
| M8353 | Other drug-induced osteomalacia in adults |
| M8354 | Other drug-induced osteomalacia in adults |
| M8355 | Other drug-induced osteomalacia in adults |
| M8356 | Other drug-induced osteomalacia in adults |
| M8357 | Other drug-induced osteomalacia in adults |
| M8358 | Other drug-induced osteomalacia in adults |
| M8359 | Other drug-induced osteomalacia in adults |
| M838  | Other adult osteomalacia                  |
| M8380 | Other adult osteomalacia                  |
| M8381 | Other adult osteomalacia                  |
| M8382 | Other adult osteomalacia                  |
| M8383 | Other adult osteomalacia                  |
| M8384 | Other adult osteomalacia                  |
| M8385 | Other adult osteomalacia                  |
| M8386 | Other adult osteomalacia                  |
| M8387 | Other adult osteomalacia                  |
| M8388 | Other adult osteomalacia                  |
| M8389 | Other adult osteomalacia                  |
| M839  | Adult osteomalacia, unspecified           |

|       |                                           |
|-------|-------------------------------------------|
| M8390 | Adult osteomalacia, unspecified           |
| M8391 | Adult osteomalacia, unspecified           |
| M8392 | Adult osteomalacia, unspecified           |
| M8393 | Adult osteomalacia, unspecified           |
| M8394 | Adult osteomalacia, unspecified           |
| M8395 | Adult osteomalacia, unspecified           |
| M8396 | Adult osteomalacia, unspecified           |
| M8397 | Adult osteomalacia, unspecified           |
| M8398 | Adult osteomalacia, unspecified           |
| M8399 | Adult osteomalacia, unspecified           |
| M84   | Disorders of continuity of bone           |
| M840  | Malunion of fracture                      |
| M8400 | Malunion of fracture                      |
| M8401 | Malunion of fracture                      |
| M8402 | Malunion of fracture                      |
| M8403 | Malunion of fracture                      |
| M8404 | Malunion of fracture                      |
| M8405 | Malunion of fracture                      |
| M8406 | Malunion of fracture                      |
| M8407 | Malunion of fracture                      |
| M8408 | Malunion of fracture                      |
| M8409 | Malunion of fracture                      |
| M841  | Nonunion of fracture [pseudarthrosis]     |
| M8410 | Nonunion of fracture [pseudarthrosis]     |
| M8411 | Nonunion of fracture [pseudarthrosis]     |
| M8412 | Nonunion of fracture [pseudarthrosis]     |
| M8413 | Nonunion of fracture [pseudarthrosis]     |
| M8414 | Nonunion of fracture [pseudarthrosis]     |
| M8415 | Nonunion of fracture [pseudarthrosis]     |
| M8416 | Nonunion of fracture [pseudarthrosis]     |
| M8417 | Nonunion of fracture [pseudarthrosis]     |
| M8418 | Nonunion of fracture [pseudarthrosis]     |
| M8419 | Nonunion of fracture [pseudarthrosis]     |
| M842  | Delayed union of fracture                 |
| M8420 | Delayed union of fracture                 |
| M8421 | Delayed union of fracture                 |
| M8422 | Delayed union of fracture                 |
| M8423 | Delayed union of fracture                 |
| M8424 | Delayed union of fracture                 |
| M8425 | Delayed union of fracture                 |
| M8426 | Delayed union of fracture                 |
| M8427 | Delayed union of fracture                 |
| M8428 | Delayed union of fracture                 |
| M8429 | Delayed union of fracture                 |
| M843  | Stress fracture, not elsewhere classified |
| M8430 | Stress fracture, not elsewhere classified |
| M8431 | Stress fracture, not elsewhere classified |
| M8432 | Stress fracture, not elsewhere classified |

|       |                                                 |
|-------|-------------------------------------------------|
| M8433 | Stress fracture, not elsewhere classified       |
| M8434 | Stress fracture, not elsewhere classified       |
| M8435 | Stress fracture, not elsewhere classified       |
| M8436 | Stress fracture, not elsewhere classified       |
| M8437 | Stress fracture, not elsewhere classified       |
| M8438 | Stress fracture, not elsewhere classified       |
| M8439 | Stress fracture, not elsewhere classified       |
| M844  | Pathological fracture, not elsewhere classified |
| M8440 | Pathological fracture, not elsewhere classified |
| M8441 | Pathological fracture, not elsewhere classified |
| M8442 | Pathological fracture, not elsewhere classified |
| M8443 | Pathological fracture, not elsewhere classified |
| M8444 | Pathological fracture, not elsewhere classified |
| M8445 | Pathological fracture, not elsewhere classified |
| M8446 | Pathological fracture, not elsewhere classified |
| M8447 | Pathological fracture, not elsewhere classified |
| M8448 | Pathological fracture, not elsewhere classified |
| M8449 | Pathological fracture, not elsewhere classified |
| M848  | Other disorders of continuity of bone           |
| M8480 | Other disorders of continuity of bone           |
| M8481 | Other disorders of continuity of bone           |
| M8482 | Other disorders of continuity of bone           |
| M8483 | Other disorders of continuity of bone           |
| M8484 | Other disorders of continuity of bone           |
| M8485 | Other disorders of continuity of bone           |
| M8486 | Other disorders of continuity of bone           |
| M8487 | Other disorders of continuity of bone           |
| M8488 | Other disorders of continuity of bone           |
| M8489 | Other disorders of continuity of bone           |
| M849  | Disorder of continuity of bone, unspecified     |
| M8490 | Disorder of continuity of bone, unspecified     |
| M8491 | Disorder of continuity of bone, unspecified     |
| M8492 | Disorder of continuity of bone, unspecified     |
| M8493 | Disorder of continuity of bone, unspecified     |
| M8494 | Disorder of continuity of bone, unspecified     |
| M8495 | Disorder of continuity of bone, unspecified     |
| M8496 | Disorder of continuity of bone, unspecified     |
| M8497 | Disorder of continuity of bone, unspecified     |
| M8498 | Disorder of continuity of bone, unspecified     |
| M8499 | Disorder of continuity of bone, unspecified     |
| M85   | Other disorders of bone density and structure   |
| M850  | Fibrous dysplasia (monostotic)                  |
| M8500 | Fibrous dysplasia (monostotic)                  |
| M8501 | Fibrous dysplasia (monostotic)                  |
| M8502 | Fibrous dysplasia (monostotic)                  |
| M8503 | Fibrous dysplasia (monostotic)                  |
| M8504 | Fibrous dysplasia (monostotic)                  |
| M8505 | Fibrous dysplasia (monostotic)                  |

|       |                                |
|-------|--------------------------------|
| M8506 | Fibrous dysplasia (monostotic) |
| M8507 | Fibrous dysplasia (monostotic) |
| M8508 | Fibrous dysplasia (monostotic) |
| M8509 | Fibrous dysplasia (monostotic) |
| M851  | Skeletal fluorosis             |
| M8510 | Skeletal fluorosis             |
| M8511 | Skeletal fluorosis             |
| M8512 | Skeletal fluorosis             |
| M8513 | Skeletal fluorosis             |
| M8514 | Skeletal fluorosis             |
| M8515 | Skeletal fluorosis             |
| M8516 | Skeletal fluorosis             |
| M8517 | Skeletal fluorosis             |
| M8518 | Skeletal fluorosis             |
| M8519 | Skeletal fluorosis             |
| M852  | Hyperostosis of skull          |
| M853  | Osteitis condensans            |
| M8530 | Osteitis condensans            |
| M8531 | Osteitis condensans            |
| M8532 | Osteitis condensans            |
| M8533 | Osteitis condensans            |
| M8534 | Osteitis condensans            |
| M8535 | Osteitis condensans            |
| M8536 | Osteitis condensans            |
| M8537 | Osteitis condensans            |
| M8538 | Osteitis condensans            |
| M8539 | Osteitis condensans            |
| M854  | Solitary bone cyst             |
| M8540 | Solitary bone cyst             |
| M8541 | Solitary bone cyst             |
| M8542 | Solitary bone cyst             |
| M8543 | Solitary bone cyst             |
| M8544 | Solitary bone cyst             |
| M8545 | Solitary bone cyst             |
| M8546 | Solitary bone cyst             |
| M8547 | Solitary bone cyst             |
| M8548 | Solitary bone cyst             |
| M8549 | Solitary bone cyst             |
| M855  | Aneurysmal bone cyst           |
| M8550 | Aneurysmal bone cyst           |
| M8551 | Aneurysmal bone cyst           |
| M8552 | Aneurysmal bone cyst           |
| M8553 | Aneurysmal bone cyst           |
| M8554 | Aneurysmal bone cyst           |
| M8555 | Aneurysmal bone cyst           |
| M8556 | Aneurysmal bone cyst           |
| M8557 | Aneurysmal bone cyst           |
| M8558 | Aneurysmal bone cyst           |

|       |                                                         |
|-------|---------------------------------------------------------|
| M8559 | Aneurysmal bone cyst                                    |
| M856  | Other cyst of bone                                      |
| M8560 | Other cyst of bone                                      |
| M8561 | Other cyst of bone                                      |
| M8562 | Other cyst of bone                                      |
| M8563 | Other cyst of bone                                      |
| M8564 | Other cyst of bone                                      |
| M8565 | Other cyst of bone                                      |
| M8566 | Other cyst of bone                                      |
| M8567 | Other cyst of bone                                      |
| M8568 | Other cyst of bone                                      |
| M8569 | Other cyst of bone                                      |
| M858  | Other specified disorders of bone density and structure |
| M8580 | Other specified disorders of bone density and structure |
| M8581 | Other specified disorders of bone density and structure |
| M8582 | Other specified disorders of bone density and structure |
| M8583 | Other specified disorders of bone density and structure |
| M8584 | Other specified disorders of bone density and structure |
| M8585 | Other specified disorders of bone density and structure |
| M8586 | Other specified disorders of bone density and structure |
| M8587 | Other specified disorders of bone density and structure |
| M8588 | Other specified disorders of bone density and structure |
| M8589 | Other specified disorders of bone density and structure |
| M859  | Disorder of bone density and structure, unspecified     |
| M8590 | Disorder of bone density and structure, unspecified     |
| M8591 | Disorder of bone density and structure, unspecified     |
| M8592 | Disorder of bone density and structure, unspecified     |
| M8593 | Disorder of bone density and structure, unspecified     |
| M8594 | Disorder of bone density and structure, unspecified     |
| M8595 | Disorder of bone density and structure, unspecified     |
| M8596 | Disorder of bone density and structure, unspecified     |
| M8597 | Disorder of bone density and structure, unspecified     |
| M8598 | Disorder of bone density and structure, unspecified     |
| M8599 | Disorder of bone density and structure, unspecified     |
| M86   | Osteomyelitis                                           |
| M860  | Acute haematogenous osteomyelitis                       |
| M8600 | Acute haematogenous osteomyelitis                       |
| M8601 | Acute haematogenous osteomyelitis                       |
| M8602 | Acute haematogenous osteomyelitis                       |
| M8603 | Acute haematogenous osteomyelitis                       |
| M8604 | Acute haematogenous osteomyelitis                       |
| M8605 | Acute haematogenous osteomyelitis                       |
| M8606 | Acute haematogenous osteomyelitis                       |
| M8607 | Acute haematogenous osteomyelitis                       |
| M8608 | Acute haematogenous osteomyelitis                       |
| M8609 | Acute haematogenous osteomyelitis                       |
| M861  | Other acute osteomyelitis                               |
| M8610 | Other acute osteomyelitis                               |

|       |                                           |
|-------|-------------------------------------------|
| M8611 | Other acute osteomyelitis                 |
| M8612 | Other acute osteomyelitis                 |
| M8613 | Other acute osteomyelitis                 |
| M8614 | Other acute osteomyelitis                 |
| M8615 | Other acute osteomyelitis                 |
| M8616 | Other acute osteomyelitis                 |
| M8617 | Other acute osteomyelitis                 |
| M8618 | Other acute osteomyelitis                 |
| M8619 | Other acute osteomyelitis                 |
| M862  | Subacute osteomyelitis                    |
| M8620 | Subacute osteomyelitis                    |
| M8621 | Subacute osteomyelitis                    |
| M8622 | Subacute osteomyelitis                    |
| M8623 | Subacute osteomyelitis                    |
| M8624 | Subacute osteomyelitis                    |
| M8625 | Subacute osteomyelitis                    |
| M8626 | Subacute osteomyelitis                    |
| M8627 | Subacute osteomyelitis                    |
| M8628 | Subacute osteomyelitis                    |
| M8629 | Subacute osteomyelitis                    |
| M863  | Chronic multifocal osteomyelitis          |
| M8630 | Chronic multifocal osteomyelitis          |
| M8631 | Chronic multifocal osteomyelitis          |
| M8632 | Chronic multifocal osteomyelitis          |
| M8633 | Chronic multifocal osteomyelitis          |
| M8634 | Chronic multifocal osteomyelitis          |
| M8635 | Chronic multifocal osteomyelitis          |
| M8636 | Chronic multifocal osteomyelitis          |
| M8637 | Chronic multifocal osteomyelitis          |
| M8638 | Chronic multifocal osteomyelitis          |
| M8639 | Chronic multifocal osteomyelitis          |
| M864  | Chronic osteomyelitis with draining sinus |
| M8640 | Chronic osteomyelitis with draining sinus |
| M8641 | Chronic osteomyelitis with draining sinus |
| M8642 | Chronic osteomyelitis with draining sinus |
| M8643 | Chronic osteomyelitis with draining sinus |
| M8644 | Chronic osteomyelitis with draining sinus |
| M8645 | Chronic osteomyelitis with draining sinus |
| M8646 | Chronic osteomyelitis with draining sinus |
| M8647 | Chronic osteomyelitis with draining sinus |
| M8648 | Chronic osteomyelitis with draining sinus |
| M8649 | Chronic osteomyelitis with draining sinus |
| M865  | Other chronic haematogenous osteomyelitis |
| M8650 | Other chronic haematogenous osteomyelitis |
| M8651 | Other chronic haematogenous osteomyelitis |
| M8652 | Other chronic haematogenous osteomyelitis |
| M8653 | Other chronic haematogenous osteomyelitis |
| M8654 | Other chronic haematogenous osteomyelitis |



|       |                                           |
|-------|-------------------------------------------|
| M8655 | Other chronic haematogenous osteomyelitis |
| M8656 | Other chronic haematogenous osteomyelitis |
| M8657 | Other chronic haematogenous osteomyelitis |
| M8658 | Other chronic haematogenous osteomyelitis |
| M8659 | Other chronic haematogenous osteomyelitis |
| M866  | Other chronic osteomyelitis               |
| M8660 | Other chronic osteomyelitis               |
| M8661 | Other chronic osteomyelitis               |
| M8662 | Other chronic osteomyelitis               |
| M8663 | Other chronic osteomyelitis               |
| M8664 | Other chronic osteomyelitis               |
| M8665 | Other chronic osteomyelitis               |
| M8666 | Other chronic osteomyelitis               |
| M8667 | Other chronic osteomyelitis               |
| M8668 | Other chronic osteomyelitis               |
| M8669 | Other chronic osteomyelitis               |
| M868  | Other osteomyelitis                       |
| M8680 | Other osteomyelitis                       |
| M8681 | Other osteomyelitis                       |
| M8682 | Other osteomyelitis                       |
| M8683 | Other osteomyelitis                       |
| M8684 | Other osteomyelitis                       |
| M8685 | Other osteomyelitis                       |
| M8686 | Other osteomyelitis                       |
| M8687 | Other osteomyelitis                       |
| M8688 | Other osteomyelitis                       |
| M8689 | Other osteomyelitis                       |
| M869  | Osteomyelitis, unspecified                |
| M8690 | Osteomyelitis, unspecified                |
| M8691 | Osteomyelitis, unspecified                |
| M8692 | Osteomyelitis, unspecified                |
| M8693 | Osteomyelitis, unspecified                |
| M8694 | Osteomyelitis, unspecified                |
| M8695 | Osteomyelitis, unspecified                |
| M8696 | Osteomyelitis, unspecified                |
| M8697 | Osteomyelitis, unspecified                |
| M8698 | Osteomyelitis, unspecified                |
| M8699 | Osteomyelitis, unspecified                |
| M87   | Osteonecrosis                             |
| M870  | Idiopathic aseptic necrosis of bone       |
| M8700 | Idiopathic aseptic necrosis of bone       |
| M8701 | Idiopathic aseptic necrosis of bone       |
| M8702 | Idiopathic aseptic necrosis of bone       |
| M8703 | Idiopathic aseptic necrosis of bone       |
| M8704 | Idiopathic aseptic necrosis of bone       |
| M8705 | Idiopathic aseptic necrosis of bone       |
| M8706 | Idiopathic aseptic necrosis of bone       |
| M8707 | Idiopathic aseptic necrosis of bone       |

|       |                                      |
|-------|--------------------------------------|
| M8708 | Idiopathic aseptic necrosis of bone  |
| M8709 | Idiopathic aseptic necrosis of bone  |
| M871  | Osteonecrosis due to drugs           |
| M8710 | Osteonecrosis due to drugs           |
| M8711 | Osteonecrosis due to drugs           |
| M8712 | Osteonecrosis due to drugs           |
| M8713 | Osteonecrosis due to drugs           |
| M8714 | Osteonecrosis due to drugs           |
| M8715 | Osteonecrosis due to drugs           |
| M8716 | Osteonecrosis due to drugs           |
| M8717 | Osteonecrosis due to drugs           |
| M8718 | Osteonecrosis due to drugs           |
| M8719 | Osteonecrosis due to drugs           |
| M872  | Osteonecrosis due to previous trauma |
| M8720 | Osteonecrosis due to previous trauma |
| M8721 | Osteonecrosis due to previous trauma |
| M8722 | Osteonecrosis due to previous trauma |
| M8723 | Osteonecrosis due to previous trauma |
| M8724 | Osteonecrosis due to previous trauma |
| M8725 | Osteonecrosis due to previous trauma |
| M8726 | Osteonecrosis due to previous trauma |
| M8727 | Osteonecrosis due to previous trauma |
| M8728 | Osteonecrosis due to previous trauma |
| M8729 | Osteonecrosis due to previous trauma |
| M873  | Other secondary osteonecrosis        |
| M8730 | Other secondary osteonecrosis        |
| M8731 | Other secondary osteonecrosis        |
| M8732 | Other secondary osteonecrosis        |
| M8733 | Other secondary osteonecrosis        |
| M8734 | Other secondary osteonecrosis        |
| M8735 | Other secondary osteonecrosis        |
| M8736 | Other secondary osteonecrosis        |
| M8737 | Other secondary osteonecrosis        |
| M8738 | Other secondary osteonecrosis        |
| M8739 | Other secondary osteonecrosis        |
| M878  | Other osteonecrosis                  |
| M8780 | Other osteonecrosis                  |
| M8781 | Other osteonecrosis                  |
| M8782 | Other osteonecrosis                  |
| M8783 | Other osteonecrosis                  |
| M8784 | Other osteonecrosis                  |
| M8785 | Other osteonecrosis                  |
| M8786 | Other osteonecrosis                  |
| M8787 | Other osteonecrosis                  |
| M8788 | Other osteonecrosis                  |
| M8789 | Other osteonecrosis                  |
| M879  | Osteonecrosis, unspecified           |
| M8790 | Osteonecrosis, unspecified           |

|       |                                              |
|-------|----------------------------------------------|
| M8791 | Osteonecrosis, unspecified                   |
| M8792 | Osteonecrosis, unspecified                   |
| M8793 | Osteonecrosis, unspecified                   |
| M8794 | Osteonecrosis, unspecified                   |
| M8795 | Osteonecrosis, unspecified                   |
| M8796 | Osteonecrosis, unspecified                   |
| M8797 | Osteonecrosis, unspecified                   |
| M8798 | Osteonecrosis, unspecified                   |
| M8799 | Osteonecrosis, unspecified                   |
| M88   | Paget disease of bone [osteitis deformans]   |
| M88   | Paget's disease of bone [osteitis deformans] |
| M880  | Paget disease of skull                       |
| M880  | Paget's disease of skull                     |
| M888  | Paget disease of other bones                 |
| M888  | Paget's disease of other bones               |
| M8880 | Paget disease of other bones                 |
| M8880 | Paget's disease of other bones               |
| M8881 | Paget disease of other bones                 |
| M8881 | Paget's disease of other bones               |
| M8882 | Paget disease of other bones                 |
| M8882 | Paget's disease of other bones               |
| M8883 | Paget disease of other bones                 |
| M8883 | Paget's disease of other bones               |
| M8884 | Paget disease of other bones                 |
| M8884 | Paget's disease of other bones               |
| M8885 | Paget disease of other bones                 |
| M8885 | Paget's disease of other bones               |
| M8886 | Paget disease of other bones                 |
| M8886 | Paget's disease of other bones               |
| M8887 | Paget disease of other bones                 |
| M8887 | Paget's disease of other bones               |
| M8888 | Paget disease of other bones                 |
| M8888 | Paget's disease of other bones               |
| M8889 | Paget disease of other bones                 |
| M8889 | Paget's disease of other bones               |
| M889  | Paget disease of bone, unspecified           |
| M889  | Paget's disease of bone, unspecified         |
| M8890 | Paget disease of bone, unspecified           |
| M8890 | Paget's disease of bone, unspecified         |
| M8891 | Paget disease of bone, unspecified           |
| M8891 | Paget's disease of bone, unspecified         |
| M8892 | Paget disease of bone, unspecified           |
| M8892 | Paget's disease of bone, unspecified         |
| M8893 | Paget disease of bone, unspecified           |
| M8893 | Paget's disease of bone, unspecified         |
| M8894 | Paget disease of bone, unspecified           |
| M8894 | Paget's disease of bone, unspecified         |
| M8895 | Paget disease of bone, unspecified           |

|       |                                                |
|-------|------------------------------------------------|
| M8895 | Paget's disease of bone, unspecified           |
| M8896 | Paget disease of bone, unspecified             |
| M8896 | Paget's disease of bone, unspecified           |
| M8897 | Paget disease of bone, unspecified             |
| M8897 | Paget's disease of bone, unspecified           |
| M8898 | Paget disease of bone, unspecified             |
| M8898 | Paget's disease of bone, unspecified           |
| M8899 | Paget disease of bone, unspecified             |
| M8899 | Paget's disease of bone, unspecified           |
| M89   | Other disorders of bone                        |
| M890  | Algoneurodystrophy                             |
| M8900 | Algoneurodystrophy                             |
| M8901 | Algoneurodystrophy                             |
| M8902 | Algoneurodystrophy                             |
| M8903 | Algoneurodystrophy                             |
| M8904 | Algoneurodystrophy                             |
| M8905 | Algoneurodystrophy                             |
| M8906 | Algoneurodystrophy                             |
| M8907 | Algoneurodystrophy                             |
| M8908 | Algoneurodystrophy                             |
| M8909 | Algoneurodystrophy                             |
| M891  | Epiphyseal arrest                              |
| M8910 | Epiphyseal arrest                              |
| M8911 | Epiphyseal arrest                              |
| M8912 | Epiphyseal arrest                              |
| M8913 | Epiphyseal arrest                              |
| M8914 | Epiphyseal arrest                              |
| M8915 | Epiphyseal arrest                              |
| M8916 | Epiphyseal arrest                              |
| M8917 | Epiphyseal arrest                              |
| M8918 | Epiphyseal arrest                              |
| M8919 | Epiphyseal arrest                              |
| M892  | Other disorders of bone development and growth |
| M8920 | Other disorders of bone development and growth |
| M8921 | Other disorders of bone development and growth |
| M8922 | Other disorders of bone development and growth |
| M8923 | Other disorders of bone development and growth |
| M8924 | Other disorders of bone development and growth |
| M8925 | Other disorders of bone development and growth |
| M8926 | Other disorders of bone development and growth |
| M8927 | Other disorders of bone development and growth |
| M8928 | Other disorders of bone development and growth |
| M8929 | Other disorders of bone development and growth |
| M893  | Hypertrophy of bone                            |
| M8930 | Hypertrophy of bone                            |
| M8931 | Hypertrophy of bone                            |
| M8932 | Hypertrophy of bone                            |
| M8933 | Hypertrophy of bone                            |

|       |                                     |
|-------|-------------------------------------|
| M8934 | Hypertrophy of bone                 |
| M8935 | Hypertrophy of bone                 |
| M8936 | Hypertrophy of bone                 |
| M8937 | Hypertrophy of bone                 |
| M8938 | Hypertrophy of bone                 |
| M8939 | Hypertrophy of bone                 |
| M894  | Other hypertrophic osteoarthropathy |
| M8940 | Other hypertrophic osteoarthropathy |
| M8941 | Other hypertrophic osteoarthropathy |
| M8942 | Other hypertrophic osteoarthropathy |
| M8943 | Other hypertrophic osteoarthropathy |
| M8944 | Other hypertrophic osteoarthropathy |
| M8945 | Other hypertrophic osteoarthropathy |
| M8946 | Other hypertrophic osteoarthropathy |
| M8947 | Other hypertrophic osteoarthropathy |
| M8948 | Other hypertrophic osteoarthropathy |
| M8949 | Other hypertrophic osteoarthropathy |
| M895  | Osteolysis                          |
| M8950 | Osteolysis                          |
| M8951 | Osteolysis                          |
| M8952 | Osteolysis                          |
| M8953 | Osteolysis                          |
| M8954 | Osteolysis                          |
| M8955 | Osteolysis                          |
| M8956 | Osteolysis                          |
| M8957 | Osteolysis                          |
| M8958 | Osteolysis                          |
| M8959 | Osteolysis                          |
| M896  | Osteopathy after poliomyelitis      |
| M8960 | Osteopathy after poliomyelitis      |
| M8961 | Osteopathy after poliomyelitis      |
| M8962 | Osteopathy after poliomyelitis      |
| M8963 | Osteopathy after poliomyelitis      |
| M8964 | Osteopathy after poliomyelitis      |
| M8965 | Osteopathy after poliomyelitis      |
| M8966 | Osteopathy after poliomyelitis      |
| M8967 | Osteopathy after poliomyelitis      |
| M8968 | Osteopathy after poliomyelitis      |
| M8969 | Osteopathy after poliomyelitis      |
| M898  | Other specified disorders of bone   |
| M8980 | Other specified disorders of bone   |
| M8981 | Other specified disorders of bone   |
| M8982 | Other specified disorders of bone   |
| M8983 | Other specified disorders of bone   |
| M8984 | Other specified disorders of bone   |
| M8985 | Other specified disorders of bone   |
| M8986 | Other specified disorders of bone   |
| M8987 | Other specified disorders of bone   |

|       |                                                               |
|-------|---------------------------------------------------------------|
| M8988 | Other specified disorders of bone                             |
| M8989 | Other specified disorders of bone                             |
| M899  | Disorder of bone, unspecified                                 |
| M8990 | Disorder of bone, unspecified                                 |
| M8991 | Disorder of bone, unspecified                                 |
| M8992 | Disorder of bone, unspecified                                 |
| M8993 | Disorder of bone, unspecified                                 |
| M8994 | Disorder of bone, unspecified                                 |
| M8995 | Disorder of bone, unspecified                                 |
| M8996 | Disorder of bone, unspecified                                 |
| M8997 | Disorder of bone, unspecified                                 |
| M8998 | Disorder of bone, unspecified                                 |
| M8999 | Disorder of bone, unspecified                                 |
| M90   | Osteopathies in diseases classified elsewhere                 |
| M900  | Tuberculosis of bone                                          |
| M9000 | Tuberculosis of bone                                          |
| M9001 | Tuberculosis of bone                                          |
| M9002 | Tuberculosis of bone                                          |
| M9003 | Tuberculosis of bone                                          |
| M9004 | Tuberculosis of bone                                          |
| M9005 | Tuberculosis of bone                                          |
| M9006 | Tuberculosis of bone                                          |
| M9007 | Tuberculosis of bone                                          |
| M9008 | Tuberculosis of bone                                          |
| M9009 | Tuberculosis of bone                                          |
| M901  | Periostitis in other infectious diseases classified elsewhere |
| M9010 | Periostitis in other infectious diseases classified elsewhere |
| M9011 | Periostitis in other infectious diseases classified elsewhere |
| M9012 | Periostitis in other infectious diseases classified elsewhere |
| M9013 | Periostitis in other infectious diseases classified elsewhere |
| M9014 | Periostitis in other infectious diseases classified elsewhere |
| M9015 | Periostitis in other infectious diseases classified elsewhere |
| M9016 | Periostitis in other infectious diseases classified elsewhere |
| M9017 | Periostitis in other infectious diseases classified elsewhere |
| M9018 | Periostitis in other infectious diseases classified elsewhere |
| M9019 | Periostitis in other infectious diseases classified elsewhere |
| M902  | Osteopathy in other infectious diseases classified elsewhere  |
| M9020 | Osteopathy in other infectious diseases classified elsewhere  |
| M9021 | Osteopathy in other infectious diseases classified elsewhere  |
| M9022 | Osteopathy in other infectious diseases classified elsewhere  |
| M9023 | Osteopathy in other infectious diseases classified elsewhere  |
| M9024 | Osteopathy in other infectious diseases classified elsewhere  |
| M9025 | Osteopathy in other infectious diseases classified elsewhere  |
| M9026 | Osteopathy in other infectious diseases classified elsewhere  |
| M9027 | Osteopathy in other infectious diseases classified elsewhere  |
| M9028 | Osteopathy in other infectious diseases classified elsewhere  |
| M9029 | Osteopathy in other infectious diseases classified elsewhere  |
| M903  | Osteonecrosis in caisson disease                              |

|       |                                                      |
|-------|------------------------------------------------------|
| M9030 | Osteonecrosis in caisson disease                     |
| M9031 | Osteonecrosis in caisson disease                     |
| M9032 | Osteonecrosis in caisson disease                     |
| M9033 | Osteonecrosis in caisson disease                     |
| M9034 | Osteonecrosis in caisson disease                     |
| M9035 | Osteonecrosis in caisson disease                     |
| M9036 | Osteonecrosis in caisson disease                     |
| M9037 | Osteonecrosis in caisson disease                     |
| M9038 | Osteonecrosis in caisson disease                     |
| M9039 | Osteonecrosis in caisson disease                     |
| M904  | Osteonecrosis due to haemoglobinopathy               |
| M9040 | Osteonecrosis due to haemoglobinopathy               |
| M9041 | Osteonecrosis due to haemoglobinopathy               |
| M9042 | Osteonecrosis due to haemoglobinopathy               |
| M9043 | Osteonecrosis due to haemoglobinopathy               |
| M9044 | Osteonecrosis due to haemoglobinopathy               |
| M9045 | Osteonecrosis due to haemoglobinopathy               |
| M9046 | Osteonecrosis due to haemoglobinopathy               |
| M9047 | Osteonecrosis due to haemoglobinopathy               |
| M9048 | Osteonecrosis due to haemoglobinopathy               |
| M9049 | Osteonecrosis due to haemoglobinopathy               |
| M905  | Osteonecrosis in other diseases classified elsewhere |
| M9050 | Osteonecrosis in other diseases classified elsewhere |
| M9051 | Osteonecrosis in other diseases classified elsewhere |
| M9052 | Osteonecrosis in other diseases classified elsewhere |
| M9053 | Osteonecrosis in other diseases classified elsewhere |
| M9054 | Osteonecrosis in other diseases classified elsewhere |
| M9055 | Osteonecrosis in other diseases classified elsewhere |
| M9056 | Osteonecrosis in other diseases classified elsewhere |
| M9057 | Osteonecrosis in other diseases classified elsewhere |
| M9058 | Osteonecrosis in other diseases classified elsewhere |
| M9059 | Osteonecrosis in other diseases classified elsewhere |
| M906  | Osteitis deformans in neoplastic disease             |
| M9060 | Osteitis deformans in neoplastic disease             |
| M9061 | Osteitis deformans in neoplastic disease             |
| M9062 | Osteitis deformans in neoplastic disease             |
| M9063 | Osteitis deformans in neoplastic disease             |
| M9064 | Osteitis deformans in neoplastic disease             |
| M9065 | Osteitis deformans in neoplastic disease             |
| M9066 | Osteitis deformans in neoplastic disease             |
| M9067 | Osteitis deformans in neoplastic disease             |
| M9068 | Osteitis deformans in neoplastic disease             |
| M9069 | Osteitis deformans in neoplastic disease             |
| M907  | Fracture of bone in neoplastic disease               |
| M9070 | Fracture of bone in neoplastic disease               |
| M9071 | Fracture of bone in neoplastic disease               |
| M9072 | Fracture of bone in neoplastic disease               |
| M9073 | Fracture of bone in neoplastic disease               |

|       |                                                                |
|-------|----------------------------------------------------------------|
| M9074 | Fracture of bone in neoplastic disease                         |
| M9075 | Fracture of bone in neoplastic disease                         |
| M9076 | Fracture of bone in neoplastic disease                         |
| M9077 | Fracture of bone in neoplastic disease                         |
| M9078 | Fracture of bone in neoplastic disease                         |
| M9079 | Fracture of bone in neoplastic disease                         |
| M908  | Osteopathy in other diseases classified elsewhere              |
| M9080 | Osteopathy in other diseases classified elsewhere              |
| M9081 | Osteopathy in other diseases classified elsewhere              |
| M9082 | Osteopathy in other diseases classified elsewhere              |
| M9083 | Osteopathy in other diseases classified elsewhere              |
| M9084 | Osteopathy in other diseases classified elsewhere              |
| M9085 | Osteopathy in other diseases classified elsewhere              |
| M9086 | Osteopathy in other diseases classified elsewhere              |
| M9087 | Osteopathy in other diseases classified elsewhere              |
| M9088 | Osteopathy in other diseases classified elsewhere              |
| M9089 | Osteopathy in other diseases classified elsewhere              |
| M91   | Juvenile osteochondrosis of hip and pelvis                     |
| M910  | Juvenile osteochondrosis of pelvis                             |
| M911  | Juvenile osteochondrosis of head of femur [Legg-Calv,-Perthes] |
| M912  | Coxa plana                                                     |
| M913  | Pseudocoxalgia                                                 |
| M918  | Other juvenile osteochondrosis of hip and pelvis               |
| M9180 | Other juvenile osteochondrosis of hip and pelvis               |
| M919  | Juvenile osteochondrosis of hip and pelvis, unspecified        |
| M9190 | Juvenile osteochondrosis of hip and pelvis, unspecified        |
| M92   | Other juvenile osteochondrosis                                 |
| M920  | Juvenile osteochondrosis of humerus                            |
| M921  | Juvenile osteochondrosis of radius and ulna                    |
| M922  | Juvenile osteochondrosis of hand                               |
| M923  | Other juvenile osteochondrosis of upper limb                   |
| M924  | Juvenile osteochondrosis of patella                            |
| M925  | Juvenile osteochondrosis of tibia and fibula                   |
| M926  | Juvenile osteochondrosis of tarsus                             |
| M927  | Juvenile osteochondrosis of metatarsus                         |
| M928  | Other specified juvenile osteochondrosis                       |
| M929  | Juvenile osteochondrosis, unspecified                          |
| M93   | Other osteochondropathies                                      |
| M930  | Slipped upper femoral epiphysis (nontraumatic)                 |
| M931  | Kienbock disease of adults                                     |
| M931  | Kienbock's disease of adults                                   |
| M932  | Osteochondritis dissecans                                      |
| M938  | Other specified osteochondropathies                            |
| M939  | Osteochondropathy, unspecified                                 |
| M94   | Other disorders of cartilage                                   |
| M940  | Chondrocostal junction syndrome [Tietze]                       |
| M941  | Relapsing polychondritis                                       |
| M9410 | Relapsing polychondritis                                       |



|       |                                        |
|-------|----------------------------------------|
| M9411 | Relapsing polychondritis               |
| M9412 | Relapsing polychondritis               |
| M9413 | Relapsing polychondritis               |
| M9414 | Relapsing polychondritis               |
| M9415 | Relapsing polychondritis               |
| M9416 | Relapsing polychondritis               |
| M9417 | Relapsing polychondritis               |
| M9418 | Relapsing polychondritis               |
| M9419 | Relapsing polychondritis               |
| M942  | Chondromalacia                         |
| M9420 | Chondromalacia                         |
| M9421 | Chondromalacia                         |
| M9422 | Chondromalacia                         |
| M9423 | Chondromalacia                         |
| M9424 | Chondromalacia                         |
| M9425 | Chondromalacia                         |
| M9426 | Chondromalacia                         |
| M9427 | Chondromalacia                         |
| M9428 | Chondromalacia                         |
| M9429 | Chondromalacia                         |
| M943  | Chondrolysis                           |
| M9430 | Chondrolysis                           |
| M9431 | Chondrolysis                           |
| M9432 | Chondrolysis                           |
| M9433 | Chondrolysis                           |
| M9434 | Chondrolysis                           |
| M9435 | Chondrolysis                           |
| M9436 | Chondrolysis                           |
| M9437 | Chondrolysis                           |
| M9438 | Chondrolysis                           |
| M9439 | Chondrolysis                           |
| M948  | Other specified disorders of cartilage |
| M9480 | Other specified disorders of cartilage |
| M9481 | Other specified disorders of cartilage |
| M9482 | Other specified disorders of cartilage |
| M9483 | Other specified disorders of cartilage |
| M9484 | Other specified disorders of cartilage |
| M9485 | Other specified disorders of cartilage |
| M9486 | Other specified disorders of cartilage |
| M9487 | Other specified disorders of cartilage |
| M9488 | Other specified disorders of cartilage |
| M9489 | Other specified disorders of cartilage |
| M949  | Disorder of cartilage, unspecified     |
| M9490 | Disorder of cartilage, unspecified     |
| M9491 | Disorder of cartilage, unspecified     |
| M9492 | Disorder of cartilage, unspecified     |
| M9493 | Disorder of cartilage, unspecified     |
| M9494 | Disorder of cartilage, unspecified     |

|       |                                                                                              |
|-------|----------------------------------------------------------------------------------------------|
| M9495 | Disorder of cartilage, unspecified                                                           |
| M9496 | Disorder of cartilage, unspecified                                                           |
| M9497 | Disorder of cartilage, unspecified                                                           |
| M9498 | Disorder of cartilage, unspecified                                                           |
| M9499 | Disorder of cartilage, unspecified                                                           |
| M95   | Other acquired deformities of musculoskeletal system and connective tissue                   |
| M950  | Acquired deformity of nose                                                                   |
| M951  | Cauliflower ear                                                                              |
| M952  | Other acquired deformity of head                                                             |
| M953  | Acquired deformity of neck                                                                   |
| M954  | Acquired deformity of chest and rib                                                          |
| M955  | Acquired deformity of pelvis                                                                 |
| M958  | Other specified acquired deformities of musculoskeletal system                               |
| M959  | Acquired deformity of musculoskeletal system, unspecified                                    |
| M96   | Postprocedural musculoskeletal disorders, not elsewhere classified                           |
| M960  | Pseudarthrosis after fusion or arthrodesis                                                   |
| M961  | Postlaminectomy syndrome, not elsewhere classified                                           |
| M962  | Postradiation kyphosis                                                                       |
| M963  | Postlaminectomy kyphosis                                                                     |
| M964  | Postsurgical lordosis                                                                        |
| M965  | Postradiation scoliosis                                                                      |
| M966  | Fracture of bone following insertion of orthopaedic implant, joint prosthesis, or bone plate |
| M968  | Other postprocedural musculoskeletal disorders                                               |
| M969  | Postprocedural musculoskeletal disorder, unspecified                                         |
| M99   | Biomechanical lesions, not elsewhere classified                                              |
| M990  | Segmental and somatic dysfunction                                                            |
| M9900 | Segmental and somatic dysfunction                                                            |
| M9901 | Segmental and somatic dysfunction                                                            |
| M9902 | Segmental and somatic dysfunction                                                            |
| M9903 | Segmental and somatic dysfunction                                                            |
| M9904 | Segmental and somatic dysfunction                                                            |
| M9905 | Segmental and somatic dysfunction                                                            |
| M9906 | Segmental and somatic dysfunction                                                            |
| M9907 | Segmental and somatic dysfunction                                                            |
| M9908 | Segmental and somatic dysfunction                                                            |
| M9909 | Segmental and somatic dysfunction                                                            |
| M991  | Subluxation complex (vertebral)                                                              |
| M9910 | Subluxation complex (vertebral)                                                              |
| M9911 | Subluxation complex (vertebral)                                                              |
| M9912 | Subluxation complex (vertebral)                                                              |
| M9913 | Subluxation complex (vertebral)                                                              |
| M9914 | Subluxation complex (vertebral)                                                              |
| M9915 | Subluxation complex (vertebral)                                                              |
| M9916 | Subluxation complex (vertebral)                                                              |
| M9917 | Subluxation complex (vertebral)                                                              |
| M9918 | Subluxation complex (vertebral)                                                              |
| M9919 | Subluxation complex (vertebral)                                                              |

|       |                                                                |
|-------|----------------------------------------------------------------|
| M992  | Subluxation stenosis of neural canal                           |
| M9920 | Subluxation stenosis of neural canal                           |
| M9921 | Subluxation stenosis of neural canal                           |
| M9922 | Subluxation stenosis of neural canal                           |
| M9923 | Subluxation stenosis of neural canal                           |
| M9924 | Subluxation stenosis of neural canal                           |
| M9925 | Subluxation stenosis of neural canal                           |
| M993  | Osseous stenosis of neural canal                               |
| M9930 | Osseous stenosis of neural canal                               |
| M9931 | Osseous stenosis of neural canal                               |
| M9932 | Osseous stenosis of neural canal                               |
| M9933 | Osseous stenosis of neural canal                               |
| M9934 | Osseous stenosis of neural canal                               |
| M9935 | Osseous stenosis of neural canal                               |
| M994  | Connective tissue stenosis of neural canal                     |
| M9940 | Connective tissue stenosis of neural canal                     |
| M9941 | Connective tissue stenosis of neural canal                     |
| M9942 | Connective tissue stenosis of neural canal                     |
| M9943 | Connective tissue stenosis of neural canal                     |
| M9944 | Connective tissue stenosis of neural canal                     |
| M9945 | Connective tissue stenosis of neural canal                     |
| M995  | Intervertebral disc stenosis of neural canal                   |
| M9950 | Intervertebral disc stenosis of neural canal                   |
| M9951 | Intervertebral disc stenosis of neural canal                   |
| M9952 | Intervertebral disc stenosis of neural canal                   |
| M9953 | Intervertebral disc stenosis of neural canal                   |
| M9954 | Intervertebral disc stenosis of neural canal                   |
| M9955 | Intervertebral disc stenosis of neural canal                   |
| M996  | Osseous and subluxation stenosis of intervertebral foramina    |
| M9960 | Osseous and subluxation stenosis of intervertebral foramina    |
| M9961 | Osseous and subluxation stenosis of intervertebral foramina    |
| M9962 | Osseous and subluxation stenosis of intervertebral foramina    |
| M9963 | Osseous and subluxation stenosis of intervertebral foramina    |
| M9964 | Osseous and subluxation stenosis of intervertebral foramina    |
| M9965 | Osseous and subluxation stenosis of intervertebral foramina    |
| M997  | Connective tissue and disc stenosis of intervertebral foramina |
| M9970 | Connective tissue and disc stenosis of intervertebral foramina |
| M9971 | Connective tissue and disc stenosis of intervertebral foramina |
| M9972 | Connective tissue and disc stenosis of intervertebral foramina |
| M9973 | Connective tissue and disc stenosis of intervertebral foramina |
| M9974 | Connective tissue and disc stenosis of intervertebral foramina |
| M9975 | Connective tissue and disc stenosis of intervertebral foramina |
| M998  | Other biomechanical lesions                                    |
| M9980 | Other biomechanical lesions                                    |
| M9981 | Other biomechanical lesions                                    |
| M9982 | Other biomechanical lesions                                    |
| M9983 | Other biomechanical lesions                                    |
| M9984 | Other biomechanical lesions                                    |

|       |                                   |
|-------|-----------------------------------|
| M9985 | Other biomechanical lesions       |
| M9986 | Other biomechanical lesions       |
| M9987 | Other biomechanical lesions       |
| M9988 | Other biomechanical lesions       |
| M9989 | Other biomechanical lesions       |
| M999  | Biomechanical lesion, unspecified |
| M9990 | Biomechanical lesion, unspecified |
| M9991 | Biomechanical lesion, unspecified |
| M9992 | Biomechanical lesion, unspecified |
| M9993 | Biomechanical lesion, unspecified |
| M9994 | Biomechanical lesion, unspecified |
| M9995 | Biomechanical lesion, unspecified |
| M9996 | Biomechanical lesion, unspecified |
| M9997 | Biomechanical lesion, unspecified |
| M9998 | Biomechanical lesion, unspecified |
| M9999 | Biomechanical lesion, unspecified |

#### Epilepsy (GP)

| READ_COD |                                                    |
|----------|----------------------------------------------------|
| E        | READ_DESC                                          |
| 1030.    | Epilepsy confirmed                                 |
| F25..    | Epilepsy                                           |
| F250.    | Generalised nonconvulsive epilepsy                 |
| F2500    | Petit mal (minor) epilepsy                         |
| F2501    | Pykno-epilepsy                                     |
| F2502    | Epileptic seizures - atonic                        |
| F2503    | Epileptic seizures - akinetic                      |
| F2504    | Juvenile absence epilepsy                          |
| F2505    | Lennox-Gastaut syndrome                            |
| F250y    | Other specified generalised nonconvulsive epilepsy |
| F250z    | Generalised nonconvulsive epilepsy NOS             |
| F251.    | Generalised convulsive epilepsy                    |
| F2510    | Grand mal (major) epilepsy                         |
| F2511    | Neonatal myoclonic epilepsy                        |
| F2512    | Epileptic seizures - clonic                        |
| F2513    | Epileptic seizures - myoclonic                     |
| F2514    | Epileptic seizures - tonic                         |
| F2515    | Tonic-clonic epilepsy                              |
| F2516    | Grand mal seizure                                  |
| F251y    | Other specified generalised convulsive epilepsy    |
| F251z    | Generalised convulsive epilepsy NOS                |
| F252.    | Petit mal status                                   |
| F253.    | Grand mal status                                   |
| F254.    | Partial epilepsy with impairment of consciousness  |
| F2540    | Temporal lobe epilepsy                             |
| F2541    | Psychomotor epilepsy                               |

|       |                                                                                                                  |
|-------|------------------------------------------------------------------------------------------------------------------|
| F2542 | Psychosensory epilepsy                                                                                           |
| F2543 | Limbic system epilepsy                                                                                           |
| F2544 | Epileptic automatism                                                                                             |
| F2545 | Complex partial epileptic seizure                                                                                |
| F254z | Partial epilepsy with impairment of consciousness NOS                                                            |
| F255. | Partial epilepsy without mention of impairment of consciousness                                                  |
| F2550 | Jacksonian, focal or motor epilepsy                                                                              |
| F2551 | Sensory induced epilepsy                                                                                         |
| F2552 | Somatosensory epilepsy                                                                                           |
| F2553 | Visceral reflex epilepsy                                                                                         |
| F2554 | Visual reflex epilepsy                                                                                           |
| F2555 | Unilateral epilepsy                                                                                              |
| F2556 | Simple partial epileptic seizure                                                                                 |
| F255y | Other specified partial epilepsy without mention of impairment of consciousness                                  |
| F255z | Partial epilepsy without mention of impairment of consciousness NOS                                              |
| F256. | Infantile spasms                                                                                                 |
| F2560 | Hypsarrhythmia                                                                                                   |
| F2561 | Salaam attacks                                                                                                   |
| F256z | Infantile spasms NOS                                                                                             |
| F257. | Kojevnikov's epilepsy                                                                                            |
| F258. | Post-ictal state                                                                                                 |
| F259. | Early infantile epileptic encephalopathy with suppression bursts                                                 |
| F25A. | Juvenile myoclonic epilepsy                                                                                      |
| F25B. | Alcohol-induced epilepsy                                                                                         |
| F25C. | Drug-induced epilepsy                                                                                            |
| F25D. | Menstrual epilepsy                                                                                               |
| F25E. | Stress-induced epilepsy                                                                                          |
| F25F. | Photosensitive epilepsy                                                                                          |
| F25G. | Severe myoclonic epilepsy in infancy                                                                             |
| F25H. | Generalised seizure                                                                                              |
| F25X. | Status epilepticus, unspecified                                                                                  |
| F25y. | Other forms of epilepsy                                                                                          |
| F25y0 | Cursive (running) epilepsy                                                                                       |
| F25y1 | Gelastic epilepsy                                                                                                |
| F25y2 | Localization-related(focal)(partial)idiopathic epilepsy and epileptic syndromes with seizures of localised onset |
| F25y3 | Complex partial status epilepticus                                                                               |
| F25y4 | Benign Rolandic epilepsy                                                                                         |
| F25y5 | Panayiotopoulos syndrome                                                                                         |
| F25yz | Other forms of epilepsy NOS                                                                                      |
| F25z. | Epilepsy NOS                                                                                                     |
| dn... | CONTROL OF EPILEPSY                                                                                              |
| dn1.. | ACETAZOLAMIDE [EPILEPSY]                                                                                         |
| dn11. | DIAMOX [EP] 500mg m/r capsules                                                                                   |
| dn12. | DIAMOX [EP] 250mg tablets                                                                                        |
| dn13. | DIAMOX [EP] 500mg injection                                                                                      |
| dn1x. | ACETAZOLAMIDE [EP] 500mg m/r capsules                                                                            |
| dn1y. | ACETAZOLAMIDE [EP] 250mg tablets                                                                                 |

|       |                                               |
|-------|-----------------------------------------------|
| dn1z. | ACETAZOLAMIDE [EP] 500mg injection            |
| dn2.. | *BECLAMIDE                                    |
| dn21. | *NYDRANE 500mg tablets                        |
| dn2z. | *BECLAMIDE 500mg tablets                      |
| dn3.. | CARBAMAZEPINE                                 |
| dn31. | CARBAMAZEPINE 100mg tablets                   |
| dn32. | CARBAMAZEPINE 200mg tablets                   |
| dn33. | CARBAMAZEPINE 400mg tablets                   |
| dn34. | TEGRETOL 100mg tablets                        |
| dn35. | TEGRETOL 200mg tablets                        |
| dn36. | TEGRETOL 400mg tablets                        |
| dn37. | TEGRETOL 100mg/5mL sugar free liquid          |
| dn38. | TEGRETOL RETARD 200mg m/r tabs                |
| dn39. | TEGRETOL RETARD 400mg m/r tabs                |
| dn3A. | *EPIMAZ 100mg tablets                         |
| dn3B. | *EPIMAZ 200mg tablets                         |
| dn3C. | *EPIMAZ 400mg tablets                         |
| dn3D. | TEGRETOL 125mg suppositories                  |
| dn3E. | TEGRETOL 250mg suppositories                  |
| dn3F. | TIMONIL RETARD 200mg m/r tablets              |
| dn3G. | TIMONIL RETARD 400mg m/r tablets              |
| dn3H. | *TERIL CR 200mg m/r tablets                   |
| dn3I. | *TERIL CR 400mg m/r tablets                   |
| dn3J. | CARBAGEN SR 200mg m/r tablets                 |
| dn3K. | CARBAGEN SR 400mg m/r tablets                 |
| dn3a. | CARBAMAZEPINE 200mg m/r tabs                  |
| dn3b. | CARBAMAZEPINE 400mg m/r tabs                  |
| dn3c. | TEGRETOL 100mg chewable tablets               |
| dn3c. | TEGRETOL 100mg chewable tablets               |
| dn3d. | TEGRETOL 200mg chewable tablets               |
| dn3d. | TEGRETOL 200mg chewable tablets               |
| dn3e. | *ARBIL MR 200mg m/r tablets                   |
| dn3f. | *ARBIL MR 400mg m/r tablets                   |
| dn3v. | CARBAMAZEPINE 125mg suppositories             |
| dn3w. | CARBAMAZEPINE 250mg suppositories             |
| dn3x. | CARBAMAZEPINE 200mg chewable tablets          |
| dn3x. | CARBAMAZEPINE 200mg chewable tablets          |
| dn3y. | CARBAMAZEPINE 100mg chewable tablets          |
| dn3y. | CARBAMAZEPINE 100mg chewable tablets          |
| dn3z. | CARBAMAZEPINE 100mg/5mL sugar free liquid     |
| dn4.. | CLONAZEPAM [EPILEPSY CONTROL]                 |
| dn41. | *RIVOTRIL 500mcg tablets                      |
| dn41. | RIVOTRIL 500micrograms tablets                |
| dn42. | RIVOTRIL 2mg tablets                          |
| dn42. | *RIVOTRIL 2mg tablets                         |
| dn4w. | CLONAZEPAM 0.5mg/5mL sugar free oral solution |
| dn4x. | CLONAZEPAM 2mg/5mL sugar free oral solution   |
| dn4y. | CLONAZEPAM 500microgram tablets               |

|       |                                          |
|-------|------------------------------------------|
| dn4z. | CLONAZEPAM 2mg tablets                   |
| dn5.. | ETHOSUXIMIDE                             |
| dn51. | *ETHOSUXIMIDE 250mg capsules             |
| dn52. | *ETHOSUXIMIDE 250mg/5mL elixir           |
| dn53. | *EMESIDE 250mg capsules                  |
| dn54. | EMESIDE 250mg/5mL syrup                  |
| dn55. | *ZARONTIN 250mg capsules                 |
| dn56. | ZARONTIN 250mg/5mL syrup                 |
| dn5x. | ETHOSUXIMIDE 250mg capsules              |
| dn5y. | *ETHOSUXIMIDE 250mg/5mL elixir           |
| dn5z. | ETHOSUXIMIDE 250mg/5mL syrup             |
| dn6.. | METHYLPHENOBARBITAL                      |
| dn61. | *PROMINAL 30mg tablets                   |
| dn62. | *PROMINAL 60mg tablets                   |
| dn63. | *PROMINAL 200mg tablets                  |
| dn6x. | METHYLPHENOBARBITONE 30mg tablets        |
| dn6y. | METHYLPHENOBARBITONE 60mg tablets        |
| dn6z. | METHYLPHENOBARBITONE 200mg tablets       |
| dn7.. | PHENOBARBITAL                            |
| dn71. | PHENOBARBITAL 15mg tablets               |
| dn72. | PHENOBARBITAL 30mg tablets               |
| dn73. | PHENOBARBITAL 60mg tablets               |
| dn74. | PHENOBARBITAL 100mg tablets              |
| dn75. | PHENOBARBITONE SODIUM 30mg tablets       |
| dn76. | PHENOBARBITONE SODIUM 60mg tablets       |
| dn77. | PHENOBARBITONE 15mg/10mL elixir          |
| dn78. | PHENOBARBITAL 200mg/1mL injection        |
| dn79. | *GARDENAL 200mg/1mL injection            |
| dn7a. | *LUMINAL 15mg tablets                    |
| dn7b. | *LUMINAL 30mg tablets                    |
| dn7c. | *LUMINAL 60mg tablets                    |
| dn7d. | PHENOBARBITAL 15mg/5mL elixir            |
| dn8.. | PHENYTOIN                                |
| dn81. | EPANUTIN 30mg/5mL suspension             |
| dn82. | EPANUTIN 50mg Infatabs                   |
| dn83. | PHENYTOIN 50mg chewable tablets          |
| dn8y. | PHENYTOIN 30mg/5mL suspension            |
| dn8z. | PHENYTOIN 90mg/5mL sugar free suspension |
| dn9.. | PHENYTOIN SODIUM                         |
| dn91. | PHENYTOIN 50mg tablets                   |
| dn92. | PHENYTOIN 100mg tablets                  |
| dn93. | EPANUTIN 25mg capsules                   |
| dn93. | *EPANUTIN 25mg capsules                  |
| dn94. | EPANUTIN 50mg capsules                   |
| dn94. | *EPANUTIN 50mg capsules                  |
| dn95. | EPANUTIN 100mg capsules                  |
| dn95. | *EPANUTIN 100mg capsules                 |
| dn96. | *EPANUTIN 300mg capsules                 |

|       |                                                   |
|-------|---------------------------------------------------|
| dn96. | EPANUTIN 300mg capsules                           |
| dn97. | *PENTRAN 50mg tablets                             |
| dn98. | *PENTRAN 100mg tablets                            |
| dn9w. | PHENYTOIN SODIUM 300mg capsules                   |
| dn9x. | PHENYTOIN SODIUM 25mg caps                        |
| dn9y. | PHENYTOIN SODIUM 50mg capsules                    |
| dn9z. | PHENYTOIN SODIUM 100mg capsules                   |
| dna.. | PRIMIDONE                                         |
| dna1. | MYSOLINE 250mg tablets                            |
| dna1. | *MYSOLINE 250mg tablets                           |
| dna2. | MYSOLINE 250mg/5mL oral suspension                |
| dna3. | *MYSOLINE 50mg tablets                            |
| dna3. | MYSOLINE 50mg tablets                             |
| dnax. | PRIMIDONE 50mg tablets                            |
| dnay. | PRIMIDONE 250mg tablets                           |
| dnaz. | PRIMIDONE 250mg/5mL oral suspension               |
| dnb.. | SODIUM VALPROATE                                  |
| dnb1. | EPILIM 100mg crushable tablets                    |
| dnb2. | EPILIM 200mg e/c tablets                          |
| dnb3. | EPILIM 500mg e/c tablets                          |
| dnb4. | EPILIM 200mg/5mL sugar free liquid                |
| dnb5. | EPILIM 200mg/5mL syrup                            |
| dnb6. | EPILIM IV 400mg/4mL injection                     |
| dnb7. | SODIUM VALPROATE 200mg e/c tablets                |
| dnb8. | SODIUM VALPROATE 500mg e/c tablets                |
| dnb9. | ORLEPT STARTER PACK 200mg e/c tablets x10         |
| dnbA. | ORLEPT 200mg/5mL sugar free liquid                |
| dnbB. | EPIVAL CR 300mg m/r tablets                       |
| dnbC. | EPIVAL CR 500mg m/r tablets                       |
| dnbD. | EPISENTA 300mg/3mL solution for injection         |
| dnbE. | SODIUM VALPROATE 300mg/3mL solution for injection |
| dnbF. | EPISENTA 150mg m/r capsules                       |
| dnbG. | EPISENTA 300mg m/r capsules                       |
| dnbH. | EPISENTA 500mg/sachet m/r granules                |
| dnbI. | EPISENTA 1g/sachet m/r granules                   |
| dnbJ. | SODIUM VALPROATE 150mg m/r capsules               |
| dnbK. | SODIUM VALPROATE 300mg m/r capsules               |
| dnbL. | SODIUM VALPROATE 500mg/sachet m/r granules        |
| dnbM. | SODIUM VALPROATE 1g/sachet m/r granules           |
| dnbN. | SODIUM VALPROATE 1g/10mL solution for injection   |
| dnbO. | EPISENTA 1g/10mL solution for injection           |
| dnbP. | EPILIM CHRONOSPHERE 50mg/sachet m/r granules      |
| dnbQ. | EPILIM CHRONOSPHERE 100mg/sachet m/r granules     |
| dnbR. | EPILIM CHRONOSPHERE 250mg/sachet m/r granules     |
| dnbS. | EPILIM CHRONOSPHERE 500mg/sachet m/r granules     |
| dnbT. | EPILIM CHRONOSPHERE 750mg/sachet m/r granules     |
| dnbU. | EPILIM CHRONOSPHERE 1g/sachet m/r granules        |
| dnba. | *ORLEPT 200mg e/c tablets                         |



|       |                                                 |
|-------|-------------------------------------------------|
| dnbb. | *ORLEPT 500mg e/c tablets                       |
| dnbc. | EPILIM CHRONO 200 m/r tablets                   |
| dnbd. | EPILIM CHRONO 300 m/r tablets                   |
| dnbe. | EPILIM CHRONO 500 m/r tablets                   |
| dnbn. | SODIUM VALPROATE 50mg/sachet m/r granules       |
| dnbo. | SODIUM VALPROATE 100mg/sachet m/r granules      |
| dnbp. | SODIUM VALPROATE 250mg/sachet m/r granules      |
| dnbq. | SODIUM VALPROATE 750mg/sachet m/r granules      |
| dnbr. | SODIUM VALPROATE 200mg m/r tablets              |
| dnbs. | SODIUM VALPROATE 300mg m/r tablets              |
| dnbt. | SODIUM VALPROATE 500mg m/r tablets              |
| dnbu. | SODIUM VALPROATE 400mg/4mL injection            |
| dnbv. | SODIUM VALPROATE 100mg crushable tablets        |
| dnbw. | SODIUM VALPROATE 200mg crushable tablets        |
| dnbx. | SODIUM VALPROATE 500mg tablets                  |
| dnby. | SODIUM VALPROATE 200mg/5mL sugar free liquid    |
| dnbz. | SODIUM VALPROATE 200mg/5mL syrup                |
| dnc.. | CLOBAZAM [EPILEPSY ONLY]                        |
| dnc1. | *CLOBAZAM SLS 10mg capsules                     |
| dne.. | VIGABATRIN                                      |
| dne1. | VIGABATRIN 500mg tablets                        |
| dne2. | SABRIL 500mg tablets                            |
| dne3. | VIGABATRIN 500mg powder sachets                 |
| dne4. | SABRIL 500mg powder sachets                     |
| dnf.. | LAMOTRIGINE                                     |
| dnf1. | LAMOTRIGINE 50mg tablets                        |
| dnf2. | LAMOTRIGINE 100mg tablets                       |
| dnf3. | LAMICTAL 50mg tablets                           |
| dnf4. | LAMICTAL 100mg tablets                          |
| dnf5. | LAMOTRIGINE 25mg tablets                        |
| dnf6. | LAMICTAL 25mg tablets                           |
| dnf7. | LAMICTAL 5mg dispersible tablets                |
| dnf8. | LAMICTAL 25mg dispersible tablets               |
| dnf9. | LAMICTAL 100mg dispersible tablets              |
| dnfA. | LAMOTRIGINE 5mg dispersible tablets             |
| dnfB. | LAMOTRIGINE 25mg dispersible tablets            |
| dnfC. | LAMOTRIGINE 100mg dispersible tablets           |
| dnfD. | LAMICTAL 200mg tablets                          |
| dnfE. | LAMOTRIGINE 200mg tablets                       |
| dnfF. | LAMICTAL MONOTHERAPY 25mg starter pack          |
| dnfG. | LAMICTAL VALPROATE ADD-ON 25mg starter pack     |
| dnfH. | LAMICTAL NON-VALPROATE ADD-ON 50mg starter pack |
| dnfJ. | LAMICTAL 2mg dispersible tablets                |
| dnfz. | LAMOTRIGINE 2mg dispersible tablets             |
| dng.. | PIRACETAM                                       |
| dng1. | NOOTROPIL 800mg tablets                         |
| dng2. | NOOTROPIL 1.2g tablets                          |
| dng3. | NOOTROPIL 33% oral solution                     |

|       |                                                        |
|-------|--------------------------------------------------------|
| dng4. | PIRACETAM 800mg tablets                                |
| dng5. | PIRACETAM 1.2g tablets                                 |
| dng6. | PIRACETAM 333.3mg/mL oral solution                     |
| dnh.. | VALPROIC ACID                                          |
| dnh1. | CONVULEX 150mg e/c capsules                            |
| dnh2. | CONVULEX 300mg e/c capsules                            |
| dnh3. | CONVULEX 500mg e/c capsules                            |
| dnh4. | VALPROIC ACID 150mg e/c capsules                       |
| dnh5. | VALPROIC ACID 300mg e/c capsules                       |
| dnh6. | VALPROIC ACID 500mg e/c capsules                       |
| dnh7. | DEPAKOTE 250mg e/c tablets                             |
| dnh8. | DEPAKOTE 500mg e/c tablets                             |
| dnhy. | VALPROIC ACID 500mg e/c tablets                        |
| dnhz. | VALPROIC ACID 250mg e/c tablets                        |
| dni.. | FOSPHENYTOIN SODIUM                                    |
| dni1. | FOSPHENYTOIN SODIUM 750mg/10mL injection concentrate   |
| dni2. | PRO-EPANUTIN 750mg/10mL injection concentrate          |
| dnj.. | GABAPENTIN                                             |
| dnj1. | GABAPENTIN 100mg capsules                              |
| dnj2. | GABAPENTIN 300mg capsules                              |
| dnj3. | GABAPENTIN 400mg capsules                              |
| dnj4. | NEURONTIN 100mg capsules                               |
| dnj5. | NEURONTIN 300mg capsules                               |
| dnj6. | NEURONTIN 400mg capsules                               |
| dnj7. | NEURONTIN 600mg tablets                                |
| dnj8. | NEURONTIN 800mg tablets                                |
| dnj9. | NEURONTIN 300mg capsules/600mg tablets titration pack  |
| dnjA. | GABAPENTIN 50mg/mL oral solution                       |
| dnjx. | GABAPENTIN 300mg capsules/600mg tablets titration pack |
| dnjy. | GABAPENTIN 600mg tablets                               |
| dnjz. | GABAPENTIN 800mg tablets                               |
| dnk.. | TOPIRAMATE                                             |
| dnk1. | TOPIRAMATE 50mg tablets                                |
| dnk2. | TOPIRAMATE 100mg tablets                               |
| dnk3. | TOPIRAMATE 200mg tablets                               |
| dnk4. | TOPAMAX 50mg tablets                                   |
| dnk5. | TOPAMAX 100mg tablets                                  |
| dnk6. | TOPAMAX 200mg tablets                                  |
| dnk7. | TOPIRAMATE 25mg tablets                                |
| dnk8. | TOPAMAX 25mg tablets                                   |
| dnk9. | TOPIRAMATE 15mg beads in capsules                      |
| dnkA. | TOPIRAMATE 25mg beads in capsules                      |
| dnkB. | TOPAMAX SPRINKLE 15mg capsules                         |
| dnkC. | TOPAMAX SPRINKLE 25mg capsules                         |
| dnkD. | TOPIRAMATE 50mg beads in capsules                      |
| dnkE. | TOPAMAX SPRINKLE 50mg capsules                         |
| dnl.. | TIAGABINE                                              |
| dnl1. | TIAGABINE 5mg tablets                                  |

|       |                                                           |
|-------|-----------------------------------------------------------|
| dnl2. | TIAGABINE 10mg tablets                                    |
| dnl3. | TIAGABINE 15mg tablets                                    |
| dnl4. | GABITRIL 5mg tablets                                      |
| dnl5. | GABITRIL 10mg tablets                                     |
| dnl6. | GABITRIL 15mg tablets                                     |
| dnm.. | OXCARBAZEPINE                                             |
| dnm1. | TRILEPTAL 150 tablets                                     |
| dnm2. | TRILEPTAL 300 tablets                                     |
| dnm3. | TRILEPTAL 600 tablets                                     |
| dnm4. | TRILEPTAL 60mg/mL sugar free oral suspension              |
| dnmw. | OXCARBAZEPINE 60mg/mL sugar free oral suspension          |
| dnmx. | OXCARBAZEPINE 150mg tablets                               |
| dnmy. | OXCARBAZEPINE 300mg tablets                               |
| dnmz. | OXCARBAZEPINE 600mg tablets                               |
| dno.. | LEVETIRACETAM                                             |
| dno1. | KEPPRA 250mg tablets                                      |
| dno2. | KEPPRA 500mg tablets                                      |
| dno3. | KEPPRA 1g tablets                                         |
| dno4. | KEPPRA 750mg tablets                                      |
| dno5. | KEPPRA 100mg/mL s/f oral solution                         |
| dno6. | KEPPRA 500mg/5mL solution for injection                   |
| dno7. | DESITREND 250mg/sachet granules                           |
| dno8. | DESITREND 500mg/sachet granules                           |
| dno9. | DESITREND 1g/sachet granules                              |
| dnoA. | DESITREND 100mg/mL oral solution                          |
| dnoB. | DESITREND 500mg/5mL concentrate for solution for infusion |
| dnor. | LEVETIRACETAM 1g/sachet granules                          |
| dnos. | LEVETIRACETAM 500mg/sachet granules                       |
| dnot. | LEVETIRACETAM 250mg/sachet granules                       |
| dnou. | LEVETIRACETAM 500mg/5mL solution for injection            |
| dnov. | LEVETIRACETAM 100mg/mL s/f oral solution                  |
| dnow. | LEVETIRACETAM 750mg tablets                               |
| dnox. | LEVETIRACETAM 1g tablets                                  |
| dnoy. | LEVETIRACETAM 500mg tablets                               |
| dnoz. | LEVETIRACETAM 250mg tablets                               |
| dnp.. | PREGABALIN                                                |
| dnp1. | LYRICA 25mg capsules                                      |
| dnp2. | LYRICA 50mg capsules                                      |
| dnp3. | LYRICA 75mg capsules                                      |
| dnp4. | LYRICA 100mg capsules                                     |
| dnp5. | LYRICA 150mg capsules                                     |
| dnp6. | LYRICA 200mg capsules                                     |
| dnp7. | LYRICA 300mg capsules                                     |
| dnp8. | LYRICA 225mg capsules                                     |
| dnp9. | LYRICA 20mg/1mL oral solution                             |
| dnpA. | LECAENT 25mg capsules                                     |
| dnpB. | LECAENT 50mg capsules                                     |
| dnpC. | LECAENT 75mg capsules                                     |

|       |                                                     |
|-------|-----------------------------------------------------|
| dnpD. | LECAENT 100mg capsules                              |
| dnpE. | LECAENT 150mg capsules                              |
| dnpF. | LECAENT 200mg capsules                              |
| dnpG. | LECAENT 225mg capsules                              |
| dnpH. | LECAENT 300mg capsules                              |
| dnpl. | REWISCA 25mg capsules                               |
| dnpJ. | REWISCA 50mg capsules                               |
| dnpK. | REWISCA 75mg capsules                               |
| dnpL. | REWISCA 100mg capsules                              |
| dnpM. | REWISCA 150mg capsules                              |
| dnpN. | REWISCA 200mg capsules                              |
| dnpO. | REWISCA 225mg capsules                              |
| dnpP. | REWISCA 300mg capsules                              |
| dnpr. | PREGABALIN 20mg/1mL oral solution                   |
| dnps. | PREGABALIN 225mg capsules                           |
| dnpt. | PREGABALIN 300mg capsules                           |
| dnpu. | PREGABALIN 200mg capsules                           |
| dnpv. | PREGABALIN 100mg capsules                           |
| dnpw. | PREGABALIN 150mg capsules                           |
| dnpX. | PREGABALIN 75mg capsules                            |
| dnpY. | PREGABALIN 50mg capsules                            |
| dnpz. | PREGABALIN 25mg capsules                            |
| dnq.. | ZONISAMIDE                                          |
| dnq1. | ZONISAMIDE 25mg capsules                            |
| dnq2. | ZONISAMIDE 50mg capsules                            |
| dnq3. | ZONISAMIDE 100mg capsules                           |
| dnq4. | ZONEGRAN 25mg capsules                              |
| dnq5. | ZONEGRAN 50mg capsules                              |
| dnq6. | ZONEGRAN 100mg capsules                             |
| dnr.. | RUFINAMIDE                                          |
| dnr1. | INOVELON 100mg tablets                              |
| dnr2. | INOVELON 200mg tablets                              |
| dnr3. | INOVELON 400mg tablets                              |
| dnr4. | INOVELON 40mg/mL oral suspension                    |
| dnrw. | RUFINAMIDE 40mg/mL oral suspension                  |
| dnrx. | RUFINAMIDE 400mg tablets                            |
| dnry. | RUFINAMIDE 200mg tablets                            |
| dnrz. | RUFINAMIDE 100mg tablets                            |
| dns.. | STIRIPENTOL                                         |
| dns1. | DIACOMIT 250mg capsules                             |
| dns2. | DIACOMIT 500mg capsules                             |
| dns3. | DIACOMIT 250mg/sachet powder for oral suspension    |
| dns4. | DIACOMIT 500mg/sachet powder for oral suspension    |
| dnsw. | STIRIPENDOL 500mg/sachet powder for oral suspension |
| dnsx. | STIRIPENTOL 250mg/sachet powder for oral suspension |
| dnsy. | STIRIPENTOL 500mg capsules                          |
| dnsz. | STIRIPENTOL 250mg capsules                          |
| dnt.. | LACOSAMIDE                                          |

|       |                                               |
|-------|-----------------------------------------------|
| dnt1. | VIMPAT 200mg/20mL solution for injection      |
| dnt2. | VIMPAT 15mg/1mL sugar free liquid             |
| dnt3. | VIMPAT 50mg tablets                           |
| dnt4. | VIMPAT 100mg tablets                          |
| dnt5. | VIMPAT 150mg tablets                          |
| dnt6. | VIMPAT 200mg tablets                          |
| dnt7. | LACOSAMIDE 200mg/20mL solution for injection  |
| dnt8. | LACOSAMIDE 15mg/1mL sugar free liquid         |
| dnt9. | LACOSAMIDE 50mg tablets                       |
| dntA. | LACOSAMIDE 100mg tablets                      |
| dntB. | LACOSAMIDE 150mg tablets                      |
| dntC. | LACOSAMIDE 200mg tablets                      |
| dntD. | VIMPAT 10mg/1mL syrup                         |
| dntE. | LACOSAMIDE 10mg/1mL sugar free liquid         |
| dnu.. | ESLICARBAZEPINE                               |
| dnu1. | ZEBINIX 800mg tablets                         |
| dnu2. | ESLICARBAZEPINE ACETATE 800mg tablets         |
| dnv.. | RETIGABINE                                    |
| dnv1. | TROBALT 50mg tablets                          |
| dnv2. | TROBALT 100mg tablets                         |
| dnv3. | TROBALT 200mg tablets                         |
| dnv4. | TROBALT 300mg tablets                         |
| dnv5. | TROBALT 400mg tablets                         |
| dnv6. | TROBALT tablets initiation pack               |
| dnv7. | RETIGABINE 50mg tablets                       |
| dnv8. | RETIGABINE 100mg tablets                      |
| dnv9. | RETIGABINE 200mg tablets                      |
| dnvA. | RETIGABINE 300mg tablets                      |
| dnvB. | RETIGABINE 400mg tablets                      |
| dnvC. | RETIGABINE 50mg+100mg tablets initiation pack |
| dnw.. | PERAMPANEL                                    |
| dnw1. | FYCOMPA 2mg tablets                           |
| dnw2. | FYCOMPA 4mg tablets                           |
| dnw3. | FYCOMPA 6mg tablets                           |
| dnw4. | FYCOMPA 8mg tablets                           |
| dnw5. | FYCOMPA 10mg tablets                          |
| dnw6. | FYCOMPA 12mg tablets                          |
| dnwu. | PERAMPANEL 12mg tablets                       |
| dnwv. | PERAMPANEL 10mg tablets                       |
| dnww. | PERAMPANEL 8mg tablets                        |
| dnwx. | PERAMPANEL 6mg tablets                        |
| dnwy. | PERAMPANEL 4mg tablets                        |
| dnwz. | PERAMPANEL 2mg tablets                        |
| do... | STATUS EPILEPTICUS DRUGS                      |
| do1.. | DIAZEPAM [EPILEPSY USE]                       |
| do11. | DIAZEMULS [EP] 10mg/2mL injection             |
| do12. | STESOLID [EP] 10mg/2mL injection              |
| do13. | *STESOLID 20mg/4mL injection                  |

|       |                                                      |
|-------|------------------------------------------------------|
| do14. | STESOLID 5mg/2.5mL rectal solution                   |
| do15. | STESOLID 10mg/2.5mL rectal solution                  |
| do16. | VALIUM [EP] 10mg/2mL injection                       |
| do17. | VALIUM [EP] 20mg/4mL injection                       |
| do18. | DIAZEPAM 5mg/2.5mL RecTubes                          |
| do19. | DIAZEPAM 10mg/2.5mL RecTubes                         |
| do1A. | DIAZEPAM 2.5mg/1.25mL RecTubes                       |
| do1B. | *DIAZEPAM 20mg/5mL RecTubes                          |
| do1t. | DIAZEPAM 2.5mg/1.25mL rectal solution                |
| do1u. | DIAZEPAM 20mg/5mL rectal solution                    |
| do1v. | DIAZEPAM 10mg/2mL emulsion injection                 |
| do1w. | DIAZEPAM 10mg/2mL injection                          |
| do1x. | DIAZEPAM 5mg/2.5mL rectal solution                   |
| do1y. | DIAZEPAM 10mg/2.5mL rectal solution                  |
| do1z. | *DIAZEPAM 20mg/4mL injection                         |
| do2.. | CLONAZEPAM [STATUS EPILEPSY]                         |
| do21. | *RIVOTRIL 1mg/1mL injection                          |
| do21. | RIVOTRIL 1mg/1mL injection                           |
| do2z. | CLONAZEPAM 1mg/1mL injection                         |
| do2z. | *CLONAZEPAM 1mg/1mL injection                        |
| do3.. | CLOMETHIAZOLE EDISYLATE [CENTRAL NERVOUS SYSTEM USE] |
| do31. | HEMINEVRIN [CNS] 8mg/mL intravenous infusion         |
| do3z. | CLOMETHIAZOLE EDISYLATE 8mg/mL intravenous infusion  |
| do4.. | LORAZEPAM [EPILEPSY]                                 |
| do41. | ATIVAN [EP] 4mg/mL injection                         |
| do5.. | PARALDEHYDE                                          |
| do51. | *PARALDEHYDE injection 5mL                           |
| do52. | *PARALDEHYDE injection 10mL                          |
| do6.. | PHENYTOIN SODIUM [STATUS EPILEPSY]                   |
| do61. | EPANUTIN [EP] 250mg/5mL injection                    |
| do6z. | PHENYTOIN SODIUM 250mg/5mL injection                 |

| ALT_CODE | DESCRIPTION                                                                                                        |
|----------|--------------------------------------------------------------------------------------------------------------------|
| G40      | Epilepsy                                                                                                           |
| G400     | Localization-related (focal)(partial) idiopathic epilepsy and epileptic syndromes with seizures of localized onset |
| G401     | Localization-related (focal)(partial) symptomatic epilepsy and epileptic syndromes with simple partial seizures    |
| G402     | Localization-related (focal)(partial) symptomatic epilepsy and epileptic syndromes with complex partial seizures   |
| G403     | Generalized idiopathic epilepsy and epileptic syndromes                                                            |
| G404     | Other generalized epilepsy and epileptic syndromes                                                                 |
| G405     | Special epileptic syndromes                                                                                        |
| G406     | Grand mal seizures, unspecified (with or without petit mal)                                                        |
| G407     | Petit mal, unspecified, without grand mal seizures                                                                 |
| G408     | Other epilepsy                                                                                                     |
| G409     | Epilepsy, unspecified                                                                                              |
| G41      | Status epilepticus                                                                                                 |

|      |                                    |
|------|------------------------------------|
| G410 | Grand mal status epilepticus       |
| G411 | Petit mal status epilepticus       |
| G412 | Complex partial status epilepticus |
| G418 | Other status epilepticus           |
| G419 | Status epilepticus, unspecified    |
